# Supplementary material for: Recent Development of Novel Aminoethyl-Substituted Chalcones as Potential Drug Candidates for the Treatment of Alzheimer’s Disease
Source: MDPI journal article supplement (doi:10.3390/molecules28186579), 2023-09-12
Supplement: s1 [file s1]

# Discovery and development of aminoethyl-O-chalcones as potential multifunctional agents against Alzheimer's disease

## PS1

I1H

1H\_8scan CDC13 {D:\Spectra} nmr 18

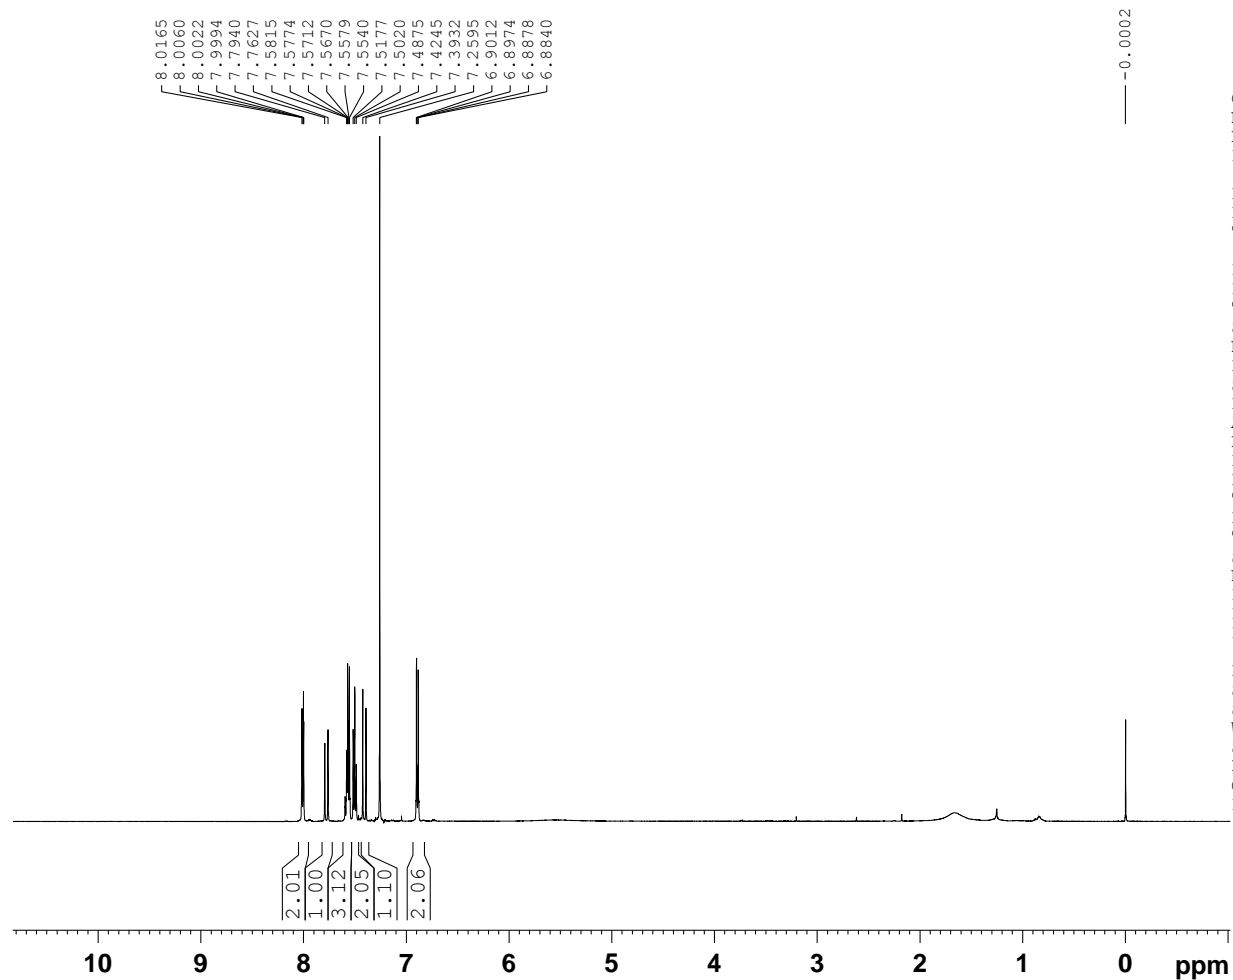

BRUKER  
AVANCE NEO  
500 MHz NMR  
SPECTROMETER  
SAIF, P.U.

Current Data Parameters  
NAME Nov25-2021  
EXPNO 180  
PROCNO 1

F2 - Acquisition Parameters  
Date\_ 20211125  
Time\_ 12.01 h  
INSTRUM Avance Neo 500  
PROBHD Z119470\_0333 (  
PULPROG zg30  
TD 65536  
SOLVENT CDC13  
NS 16  
DS 0  
SWH 14705.883 Hz  
FIDRES 0.448788 Hz  
AQ 2.2282240 sec  
RG 101  
DW 34.000 usec  
DE 6.79 usec  
TE 300.2 K  
D1 1.00000000 sec  
TD0 1  
SFO1 500.1730885 MHz  
NUC1 1H  
P0 3.33 usec  
P1 10.00 usec  
PLW1 20.93000031 W

F2 - Processing parameters  
SI 65536  
SF 500.1700125 MHz  
WDW EM  
SSB 0  
LB 0.30 Hz  
GB 0  
PC 1.00

11H  
1H\_8scan CDCl3 {D:\Spectra} nmr 18

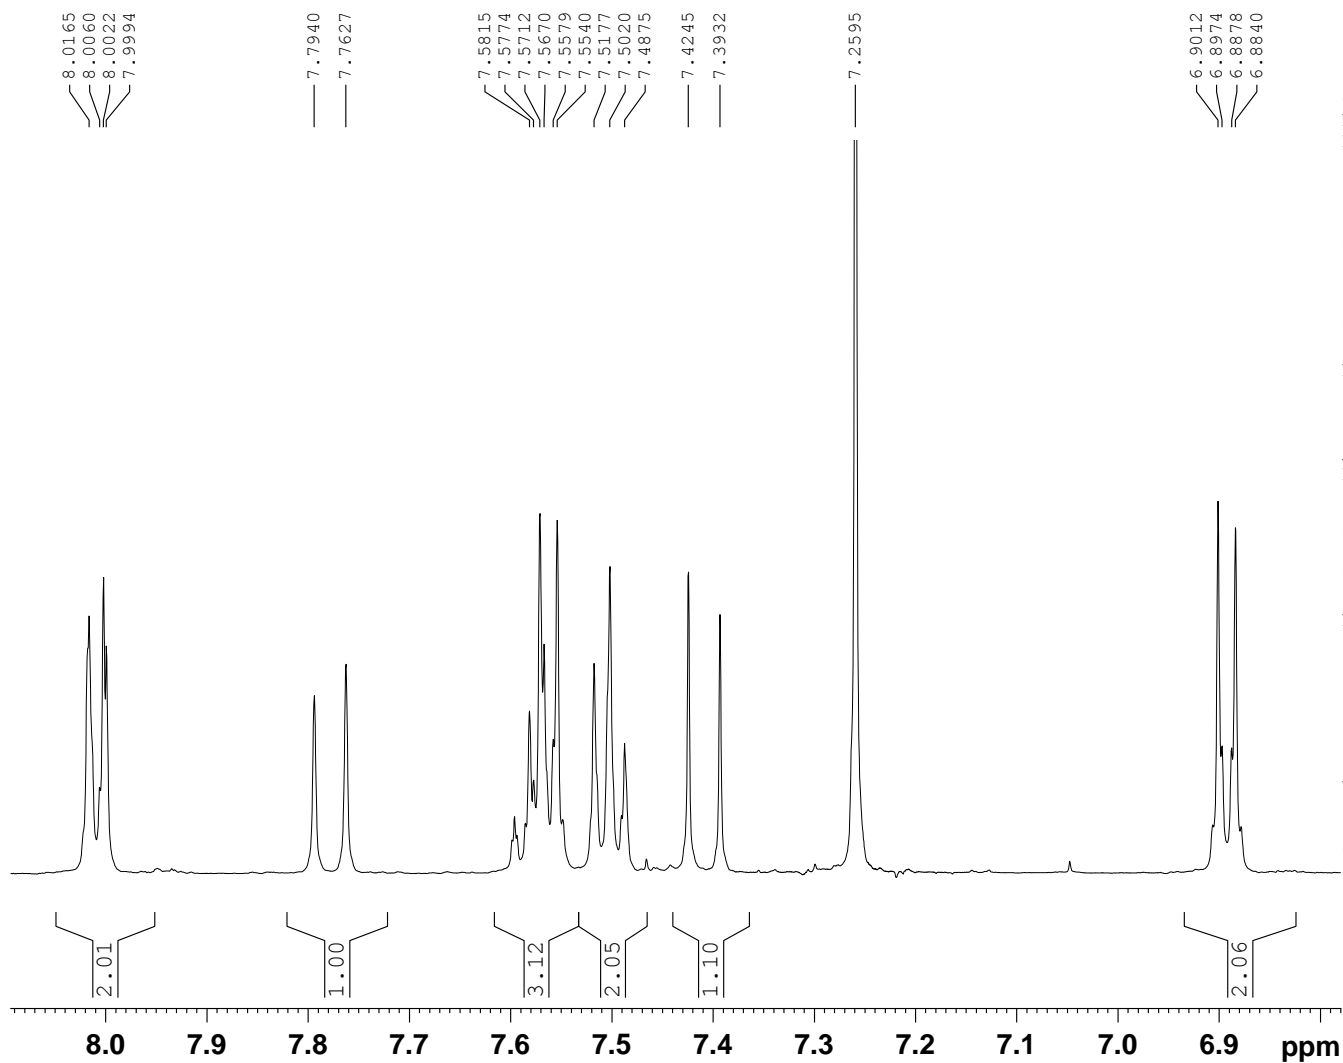

BRUKER  
AVANCE NEO  
500 MHz NMR  
SPECTROMETER  
SAIF, P.U.

Current Data Parameters  
NAME Nov25-2021  
EXPNO 180  
PROCNO 1

F2 - Acquisition Parameters  
Date\_ 20211125  
Time\_ 12.01 h  
INSTRUM Avance Neo 500  
PROBHD Z119470\_0333 (  
PULPROG zg30  
TD 65536  
SOLVENT CDCl3  
NS 16  
DS 0  
SWH 14705.883 Hz  
FIDRES 0.448788 Hz  
AQ 2.2282240 sec  
RG 101  
DW 34.000 usec  
DE 6.79 usec  
TE 300.2 K  
D1 1.00000000 sec  
TD0 1  
SFO1 500.1730885 MHz  
NUC1 1H  
P0 3.33 usec  
P1 10.00 usec  
PLW1 20.93000031 W

F2 - Processing parameters  
SI 65536  
SF 500.1700125 MHz  
WDW EM  
SSB 0  
LB 0.30 Hz  
GB 0  
PC 1.00

1H  
1H\_8scan CDCl3 {D:\Spectra} nmr 18

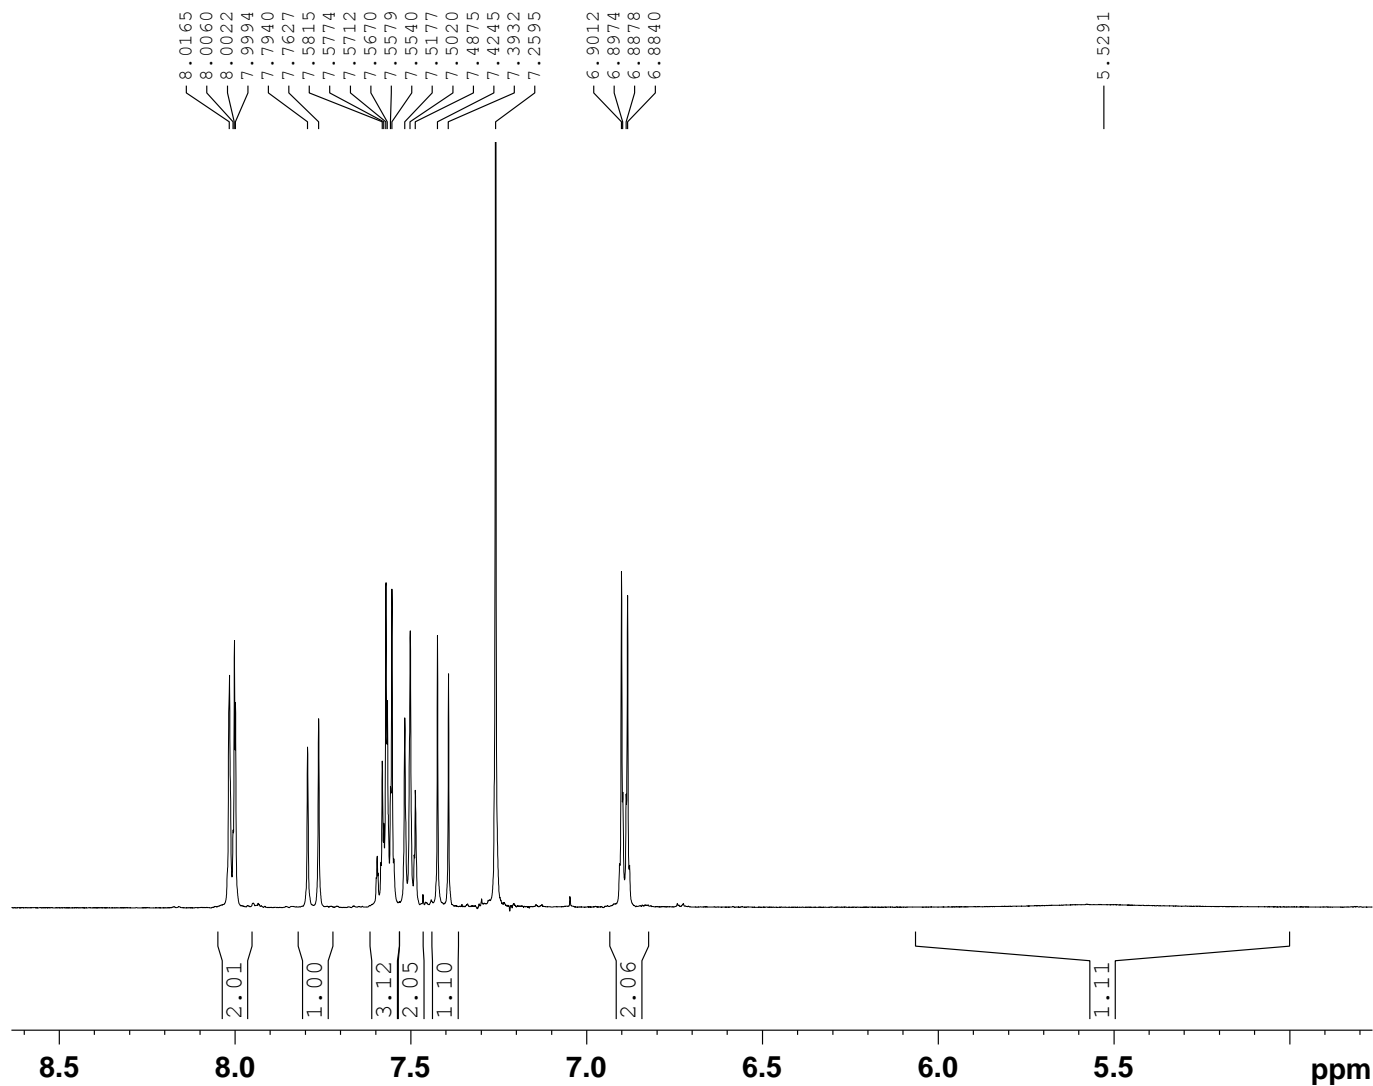

BRUKER  
AVANCE NEO  
500 MHz NMR  
SPECTROMETER  
SAIF, P.U.

Current Data Parameters  
NAME Nov25-2021  
EXPNO 180  
PROCNO 1

F2 - Acquisition Parameters  
Date\_ 20211125  
Time 12.01 h  
INSTRUM Avance Neo 500  
PROBHD Z119470\_0333 (   
PULPROG zg30  
TD 65536  
SOLVENT CDCl3  
NS 16  
DS 0  
SWH 14705.883 Hz  
FIDRES 0.448788 Hz  
AQ 2.2282240 sec  
RG 101  
DW 34.000 usec  
DE 6.79 usec  
TE 300.2 K  
D1 1.00000000 sec  
TD0 1  
SFO1 500.1730885 MHz  
NUC1 1H  
P0 3.33 usec  
P1 10.00 usec  
PLW1 20.93000031 W

F2 - Processing parameters  
SI 65536  
SF 500.1700125 MHz  
WDW EM  
SSB 0  
LB 0.30 Hz  
GB 0  
PC 1.00

1H  
1H\_8scan CDC13 {D:\Spectra} nmr 18

BRUKER  
AVANCE NEO  
500 MHz NMR  
SPECTROMETER  
SAIF, P.U.

Current Data Parameters  
NAME Nov25-2021  
EXPNO 180  
PROCNO 1

F2 - Acquisition Parameters  
Date\_ 20211125  
Time 12.01 h  
INSTRUM Avance Neo 500  
PROBHD Z119470\_0333 (   
PULPROG zg30  
TD 65536  
SOLVENT CDC13  
NS 16  
DS 0  
SWH 14705.883 Hz  
FIDRES 0.448788 Hz  
AQ 2.2282240 sec  
RG 101  
DW 34.000 usec  
DE 6.79 usec  
TE 300.2 K  
D1 1.00000000 sec  
TD0 1  
SFO1 500.1730885 MHz  
NUC1 1H  
P0 3.33 usec  
P1 10.00 usec  
PLW1 20.93000031 W

F2 - Processing parameters  
SI 65536  
SF 500.1700125 MHz  
WDW EM  
SSB 0  
LB 0.30 Hz  
GB 0  
PC 1.00

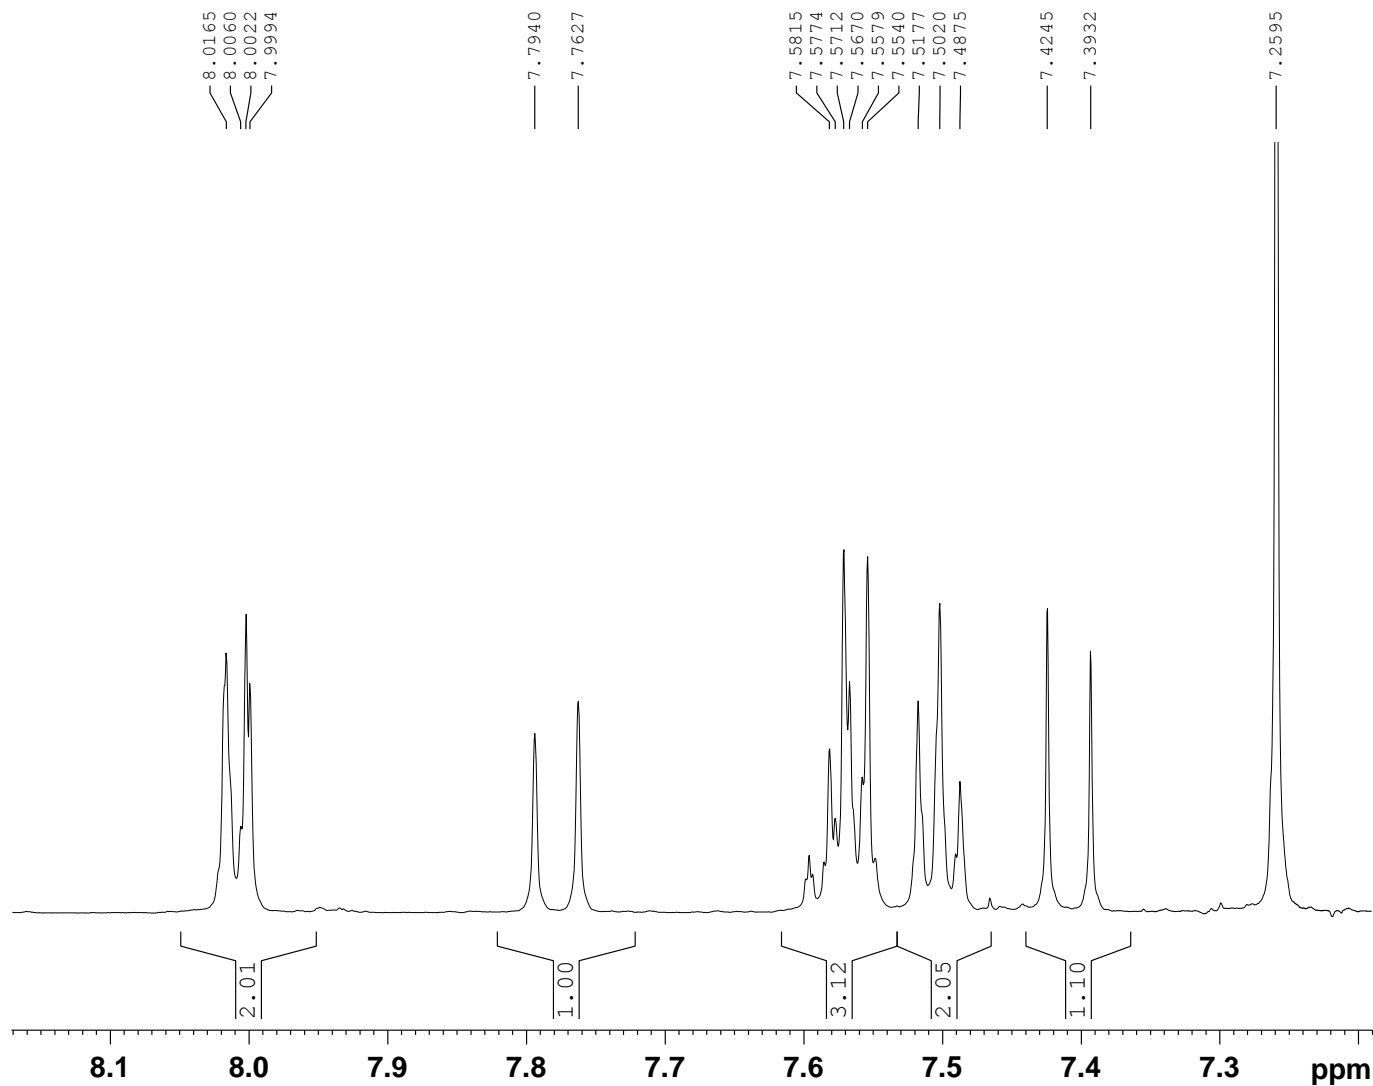

I1H  
1H\_8scan CDC13 {D:\Spectra} nmr 18

BRUKER  
AVANCE NEO  
500 MHz NMR  
SPECTROMETER  
SAIF, P.U.

Current Data Parameters  
NAME Nov25-2021  
EXPNO 180  
PROCNO 1

F2 - Acquisition Parameters  
Date\_ 20211125  
Time 12.01 h  
INSTRUM Avance Neo 500  
PROBHD Z119470\_0333 (   
PULPROG zg30  
TD 65536  
SOLVENT CDC13  
NS 16  
DS 0  
SWH 14705.883 Hz  
FIDRES 0.448788 Hz  
AQ 2.2282240 sec  
RG 101  
DW 34.000 usec  
DE 6.79 usec  
TE 300.2 K  
D1 1.00000000 sec  
TD0 1  
SFO1 500.1730885 MHz  
NUC1 1H  
P0 3.33 usec  
P1 10.00 usec  
PLW1 20.93000031 W

F2 - Processing parameters  
SI 65536  
SF 500.1700125 MHz  
WDW EM  
SSB 0  
LB 0.30 Hz  
GB 0  
PC 1.00

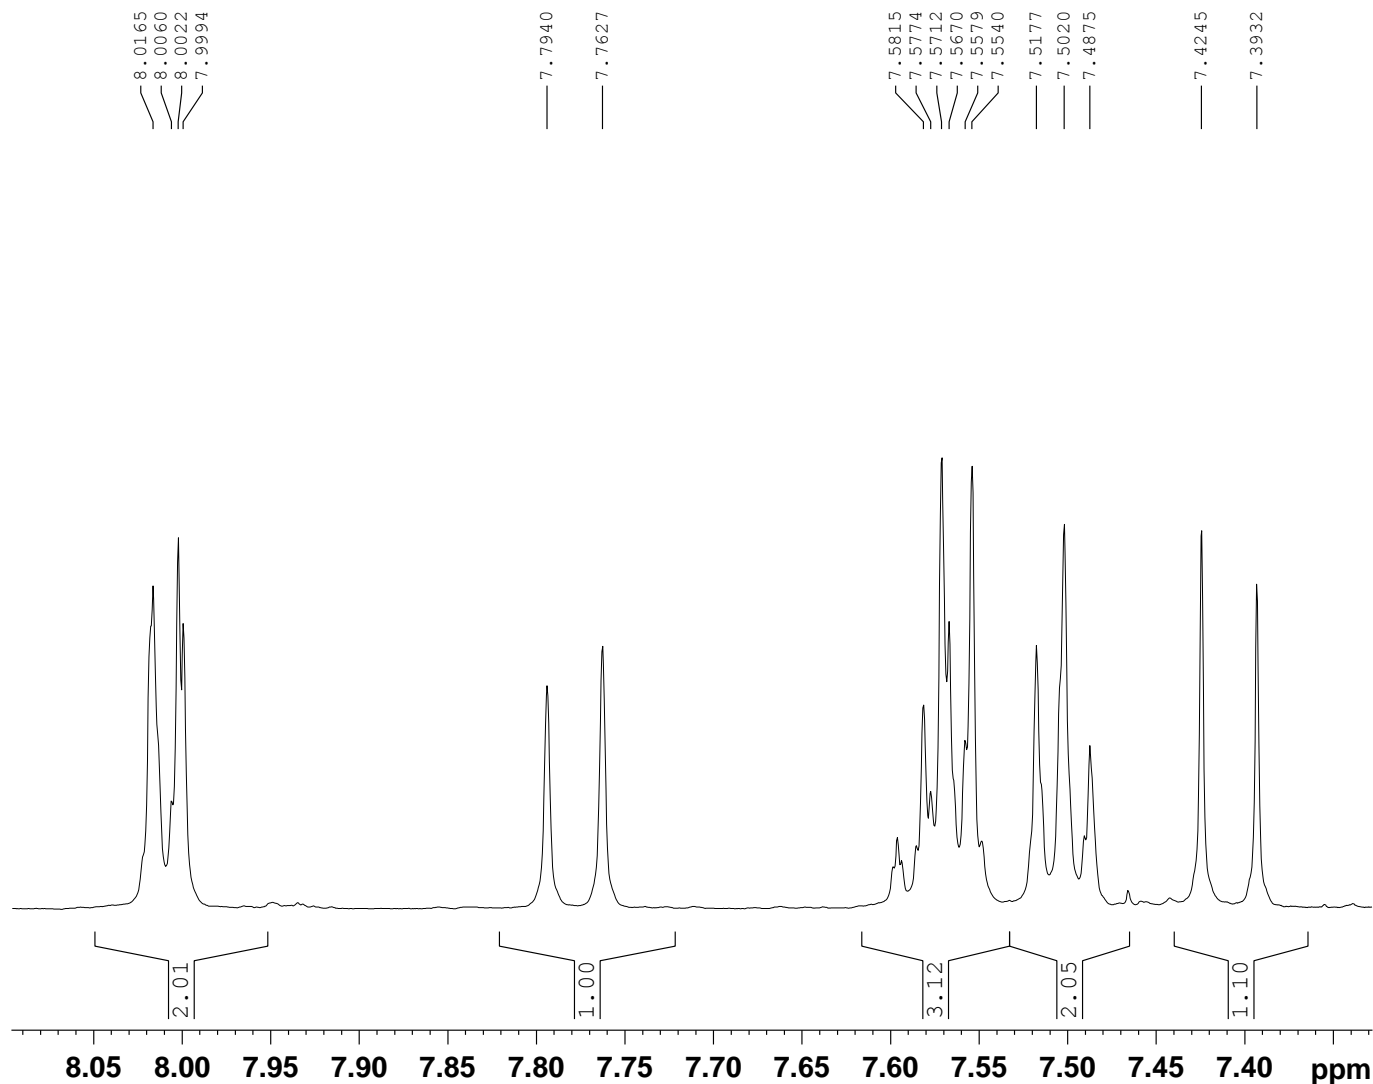

INH  
C13CPD DMSO {D:\Spectra} nmr 4

BRUKER  
AVANCE NEO  
500 MHz NMR SPECTROMETER  
SAIF, PANJAB UNIVERSITY,  
CHANDIGARH

Current Data Parameters  
NAME Jan12-2022  
EXPNO 42  
PROCNO 1

F2 - Acquisition Parameters  
Date\_ 20220113  
Time\_ 7.01 h  
INSTRUM Avance Neo 500  
PROBHD Z119470\_0333 (  
PULPROG zgpg30  
TD 65536  
SOLVENT DMSO  
NS 512  
DS 4  
SWH 37037.035 Hz  
FIDRES 1.130281 Hz  
AQ 0.8847360 sec  
RG 101  
DW 13.500 usec  
DE 6.50 usec  
TE 300.1 K  
D1 2.00000000 sec  
D11 0.03000000 sec  
TD0 1  
SFO1 125.7804233 MHz  
NUC1 13C  
P0 3.33 usec  
P1 10.00 usec  
PLW1 83.14099884 W  
SFO2 500.1720007 MHz  
NUC2 1H  
CPDPRG[2] waltz65  
PCPD2 80.00 usec  
PLW2 20.93000031 W  
PLW12 0.32703000 W  
PLW13 0.16449000 W

F2 - Processing parameters  
SI 32768  
SF 125.7679219 MHz  
WDW EM  
SSB 0  
LB 1.00 Hz  
GB 0  
PC 1.40

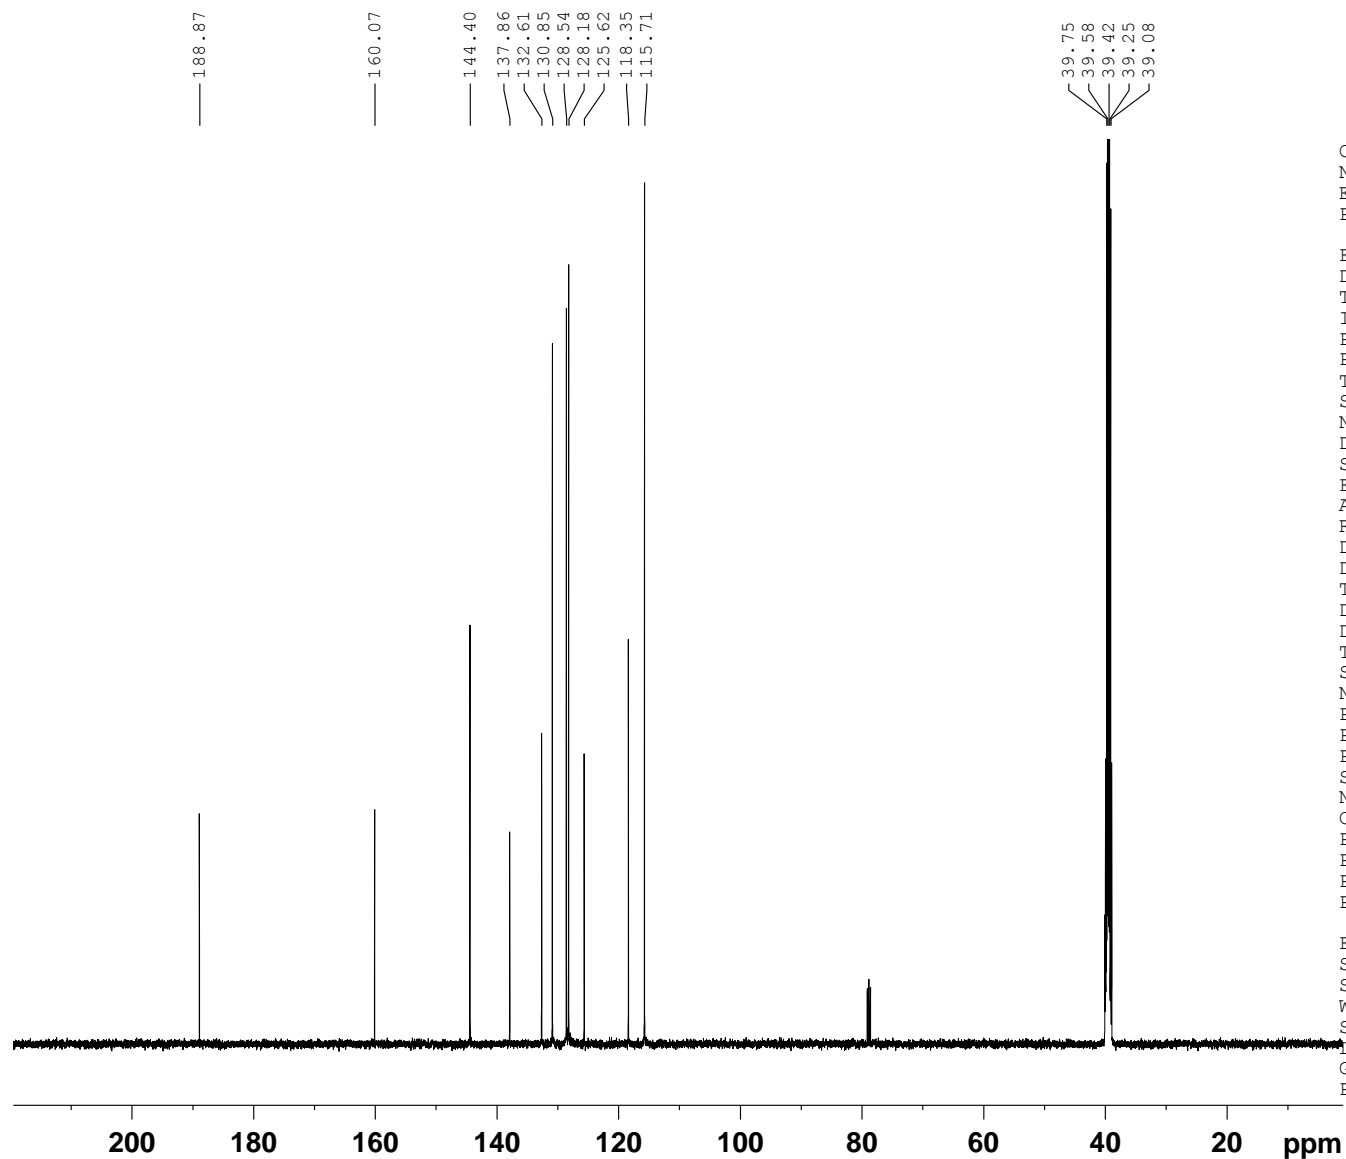

INH  
C13CPD DMSO {D:\Spectra} nmr 4

BRUKER  
AVANCE NEO  
500 MHz NMR SPECTROMETER  
SAIF, PANJAB UNIVERSITY,  
CHANDIGARH

Current Data Parameters  
NAME Jan12-2022  
EXPNO 42  
PROCNO 1

F2 - Acquisition Parameters  
Date\_ 20220113  
Time\_ 7.01 h  
INSTRUM Avance Neo 500  
PROBHD Z119470\_0333 (  
PULPROG zgpg30  
TD 65536  
SOLVENT DMSO  
NS 512  
DS 4  
SWH 37037.035 Hz  
FIDRES 1.130281 Hz  
AQ 0.8847360 sec  
RG 101  
DW 13.500 usec  
DE 6.50 usec  
TE 300.1 K  
D1 2.00000000 sec  
D11 0.03000000 sec  
TD0 1  
SFO1 125.7804233 MHz  
NUC1 13C  
P0 3.33 usec  
P1 10.00 usec  
PLW1 83.14099884 W  
SFO2 500.1720007 MHz  
NUC2 1H  
CPDPRG[2] waltz65  
PCPD2 80.00 usec  
PLW2 20.93000031 W  
PLW12 0.32703000 W  
PLW13 0.16449000 W

F2 - Processing parameters  
SI 32768  
SF 125.7679219 MHz  
WDW EM  
SSB 0  
LB 1.00 Hz  
GB 0  
PC 1.40

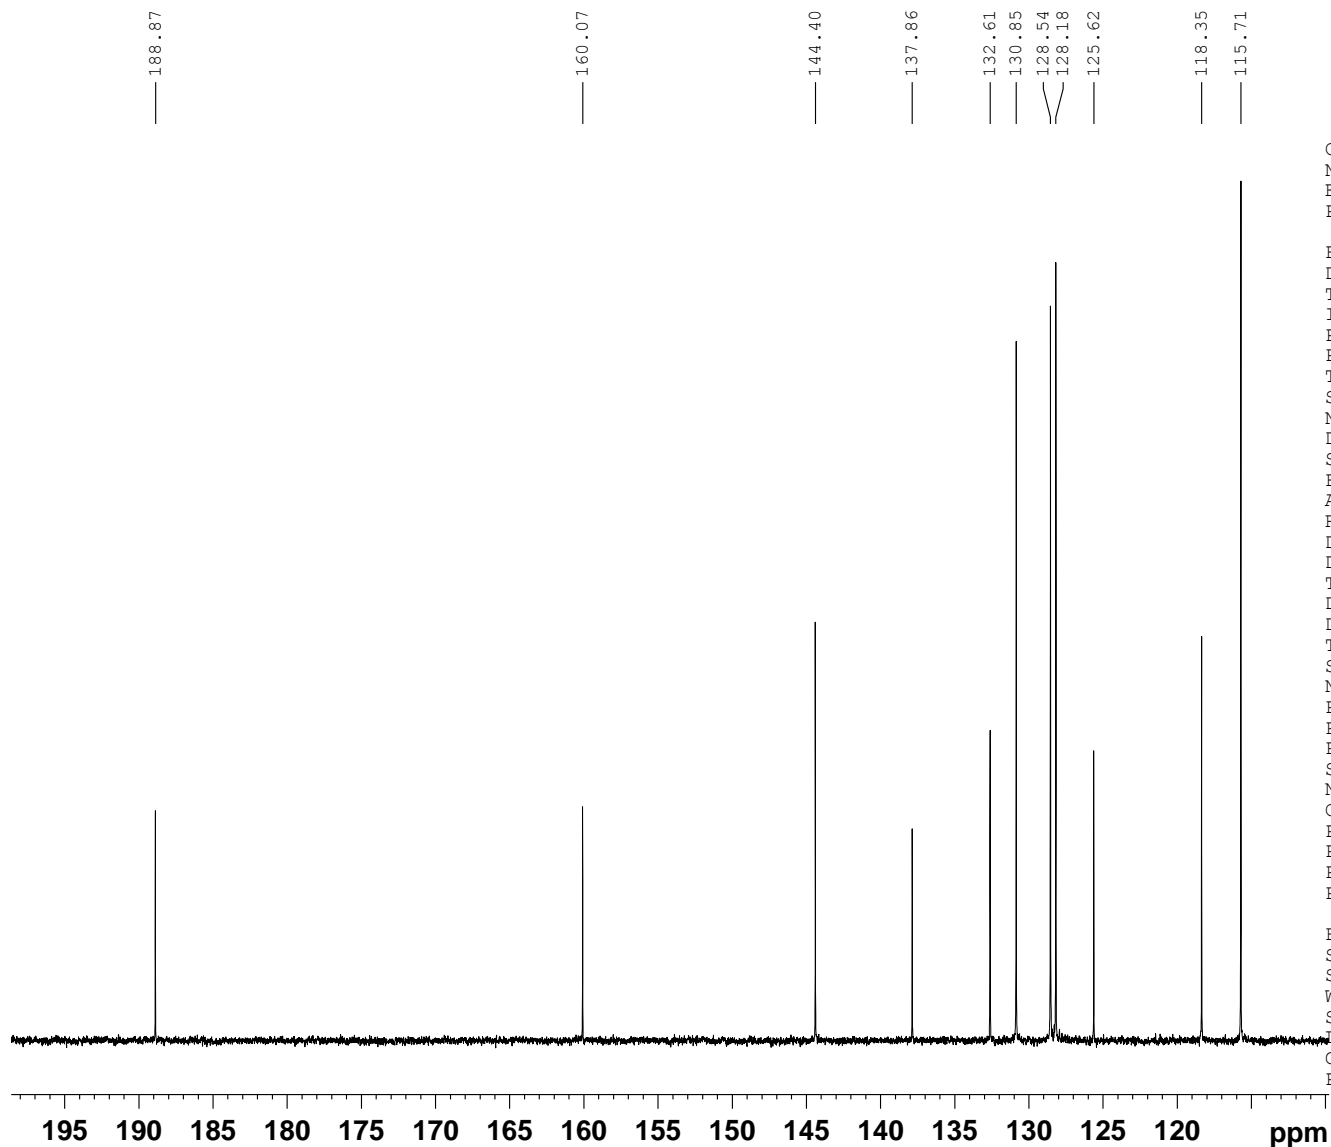

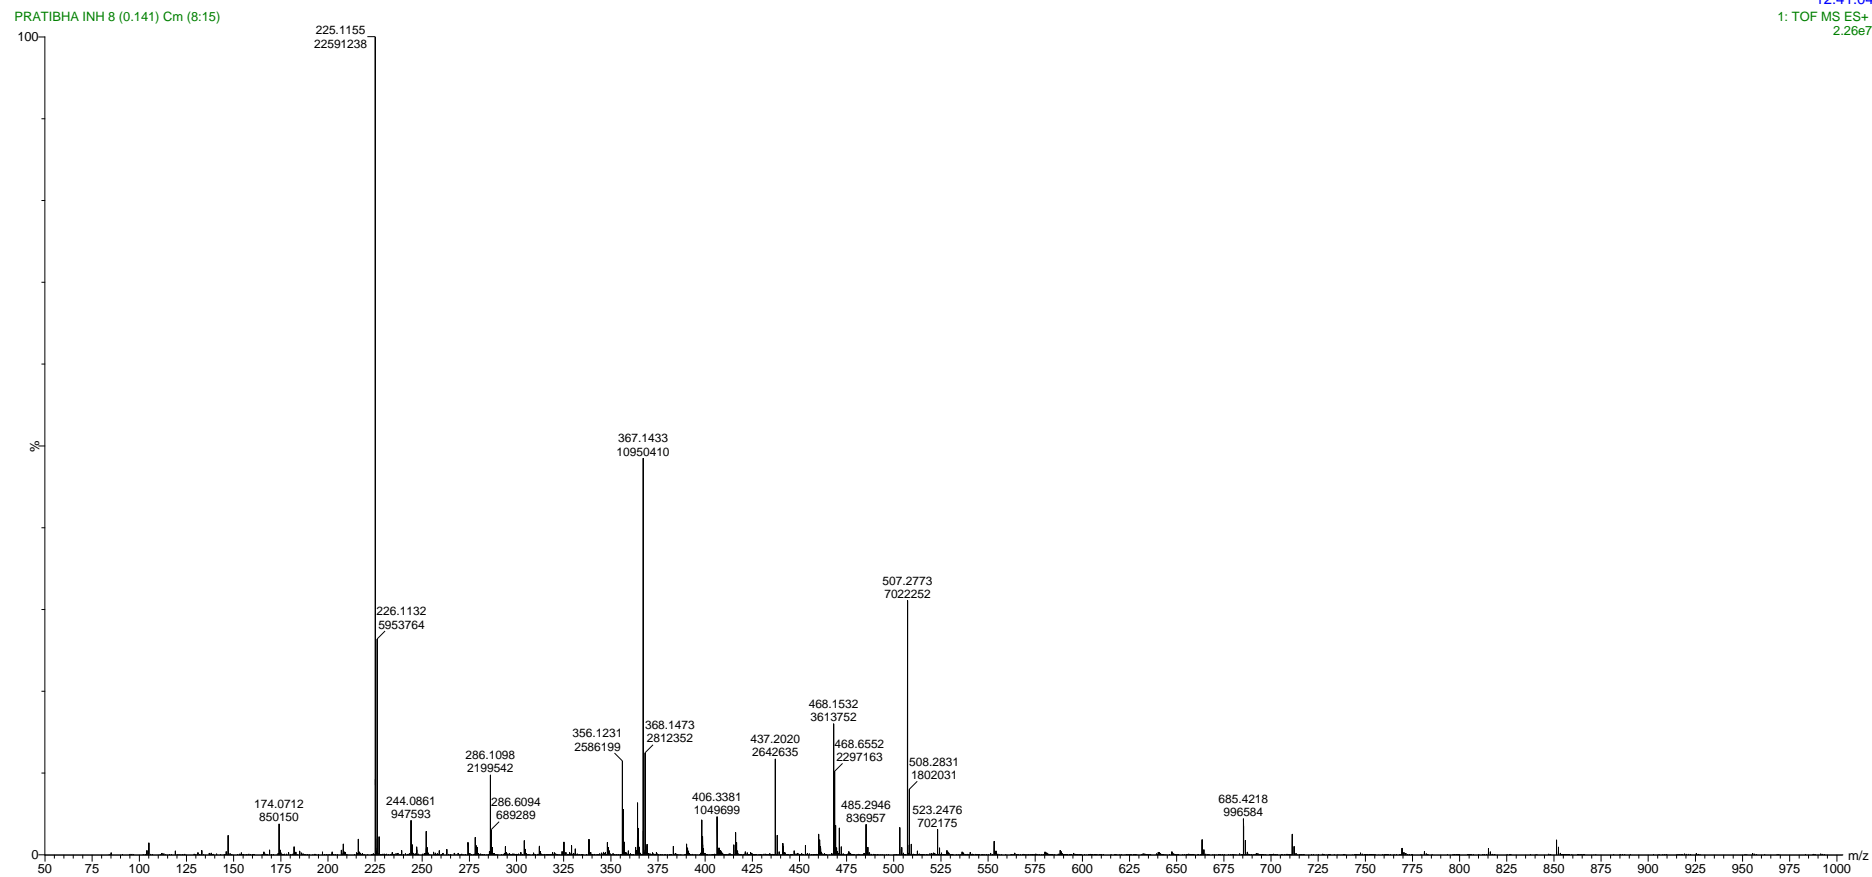



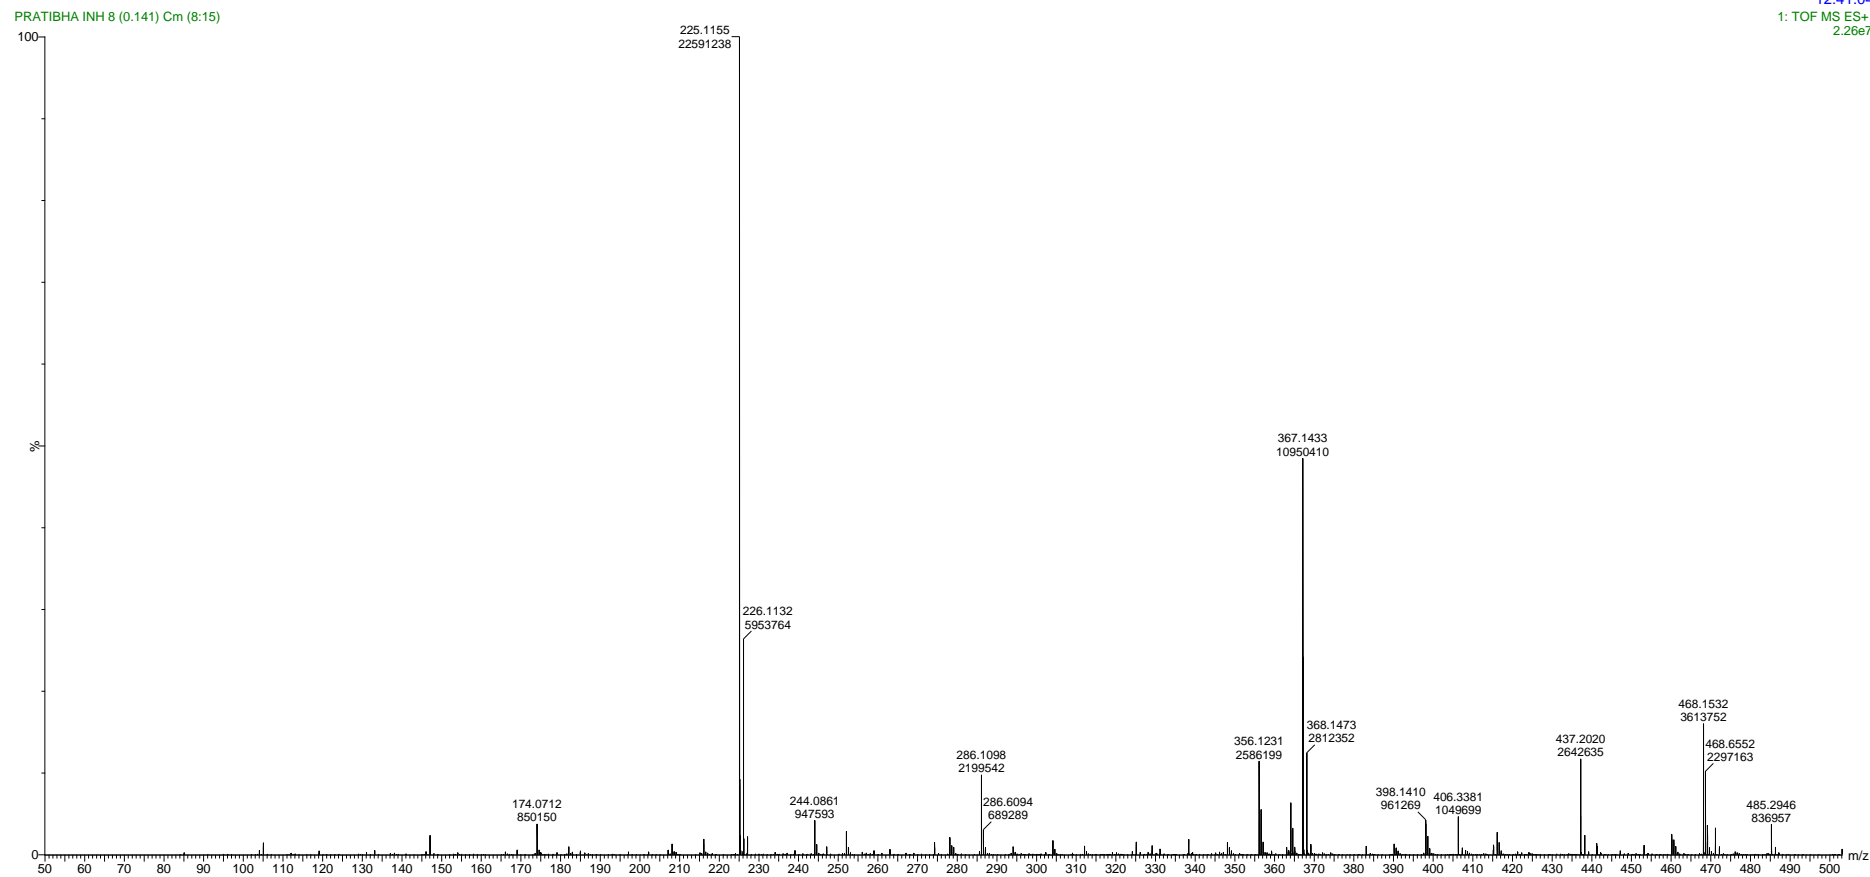

**PS2**

CH-O-1  
1H\_8scan CDCl3 {D:\Spectra} nmr 41

BRUKER  
AVANCE NEO  
500 MHz NMR  
SPECTROMETER  
SAIF, P.U.

Current Data Parameters  
NAME May05-2022  
EXPNO 410  
PROCNO 1

F2 - Acquisition Parameters  
Date\_ 20220505  
Time 15.56 h  
INSTRUM Avance Neo 500  
PROBHD Z119470\_0333 (  
PULPROG zg30  
TD 65536  
SOLVENT CDCl3  
NS 16  
DS 0  
SWH 14705.883 Hz  
FIDRES 0.448788 Hz  
AQ 2.2282240 sec  
RG 28.3797  
DW 34.000 usec  
DE 6.79 usec  
TE 300.1 K  
D1 1.00000000 sec  
TD0 1  
SFO1 500.1730885 MHz  
NUC1 1H  
P0 3.33 usec  
P1 10.00 usec  
PLW1 20.93000031 W

F2 - Processing parameters  
SI 65536  
SF 500.1700452 MHz  
WDW EM  
SSB 0  
LB 0.30 Hz  
GB 0  
PC 1.00

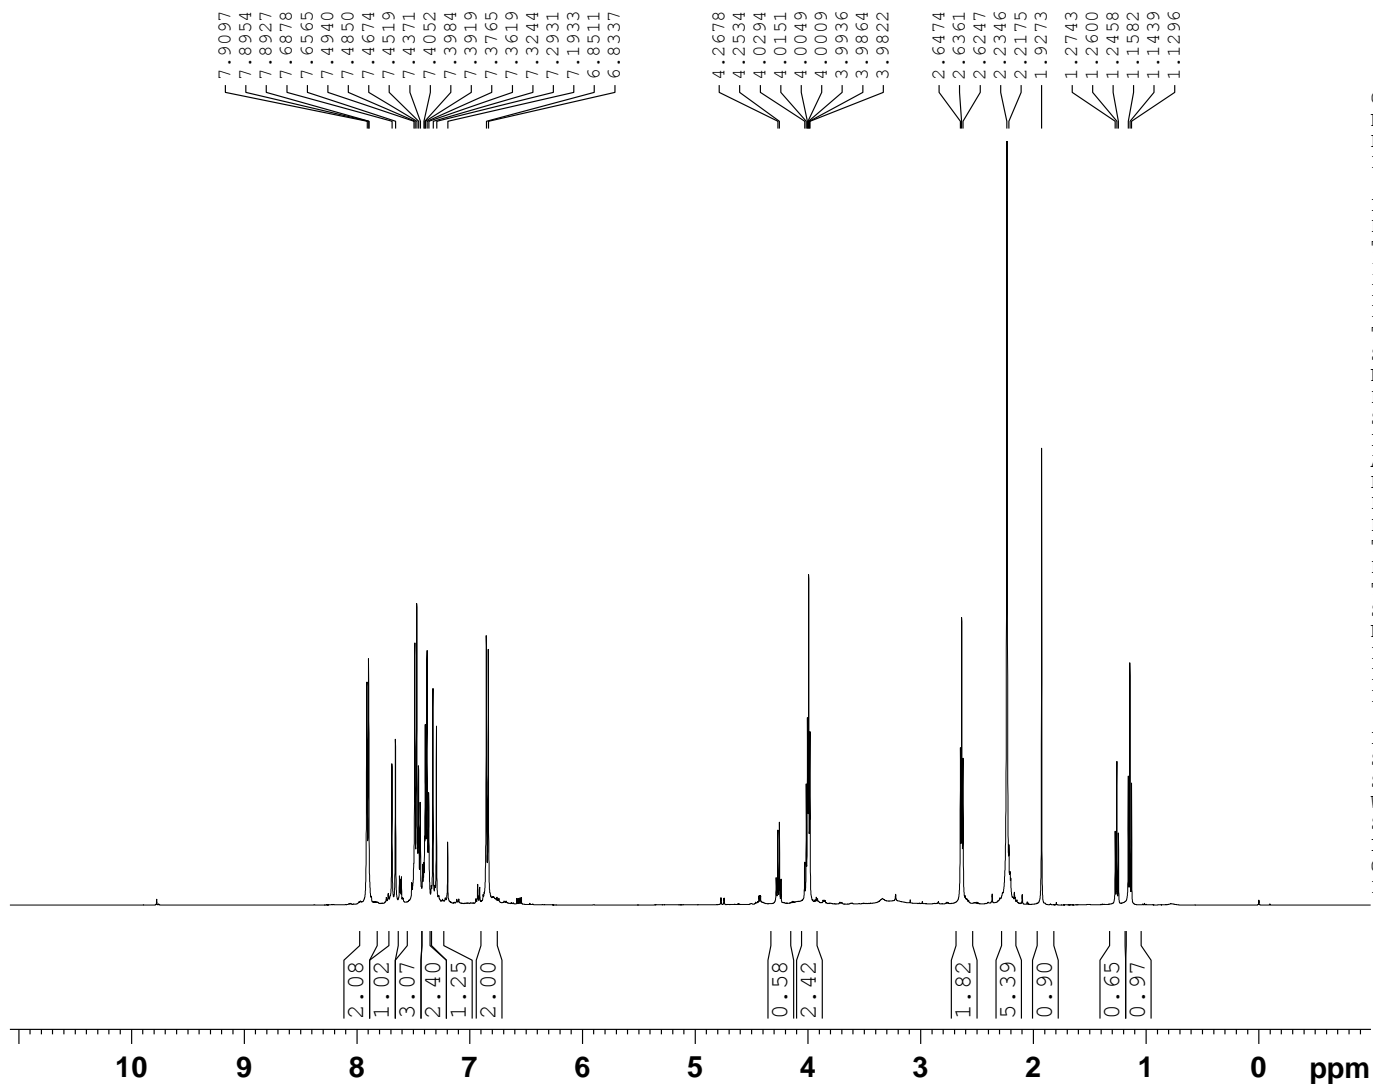

CH-O-1  
1H\_8scan CDC13 {D:\Spectra} nmr 41

BRUKER  
AVANCE NEO  
500 MHz NMR  
SPECTROMETER  
SAIF, P.U.

Current Data Parameters  
NAME May05-2022  
EXPNO 410  
PROCNO 1

F2 - Acquisition Parameters  
Date\_ 20220505  
Time 15.56 h  
INSTRUM Avance Neo 500  
PROBHD Z119470\_0333 (  
PULPROG zg30  
TD 65536  
SOLVENT CDC13  
NS 16  
DS 0  
SWH 14705.883 Hz  
FIDRES 0.448788 Hz  
AQ 2.2282240 sec  
RG 28.3797  
DW 34.000 usec  
DE 6.79 usec  
TE 300.1 K  
D1 1.00000000 sec  
TD0 1  
SFO1 500.1730885 MHz  
NUC1 1H  
P0 3.33 usec  
P1 10.00 usec  
PLW1 20.93000031 W

F2 - Processing parameters  
SI 65536  
SF 500.1700452 MHz  
WDW EM  
SSB 0  
LB 0.30 Hz  
GB 0  
PC 1.00

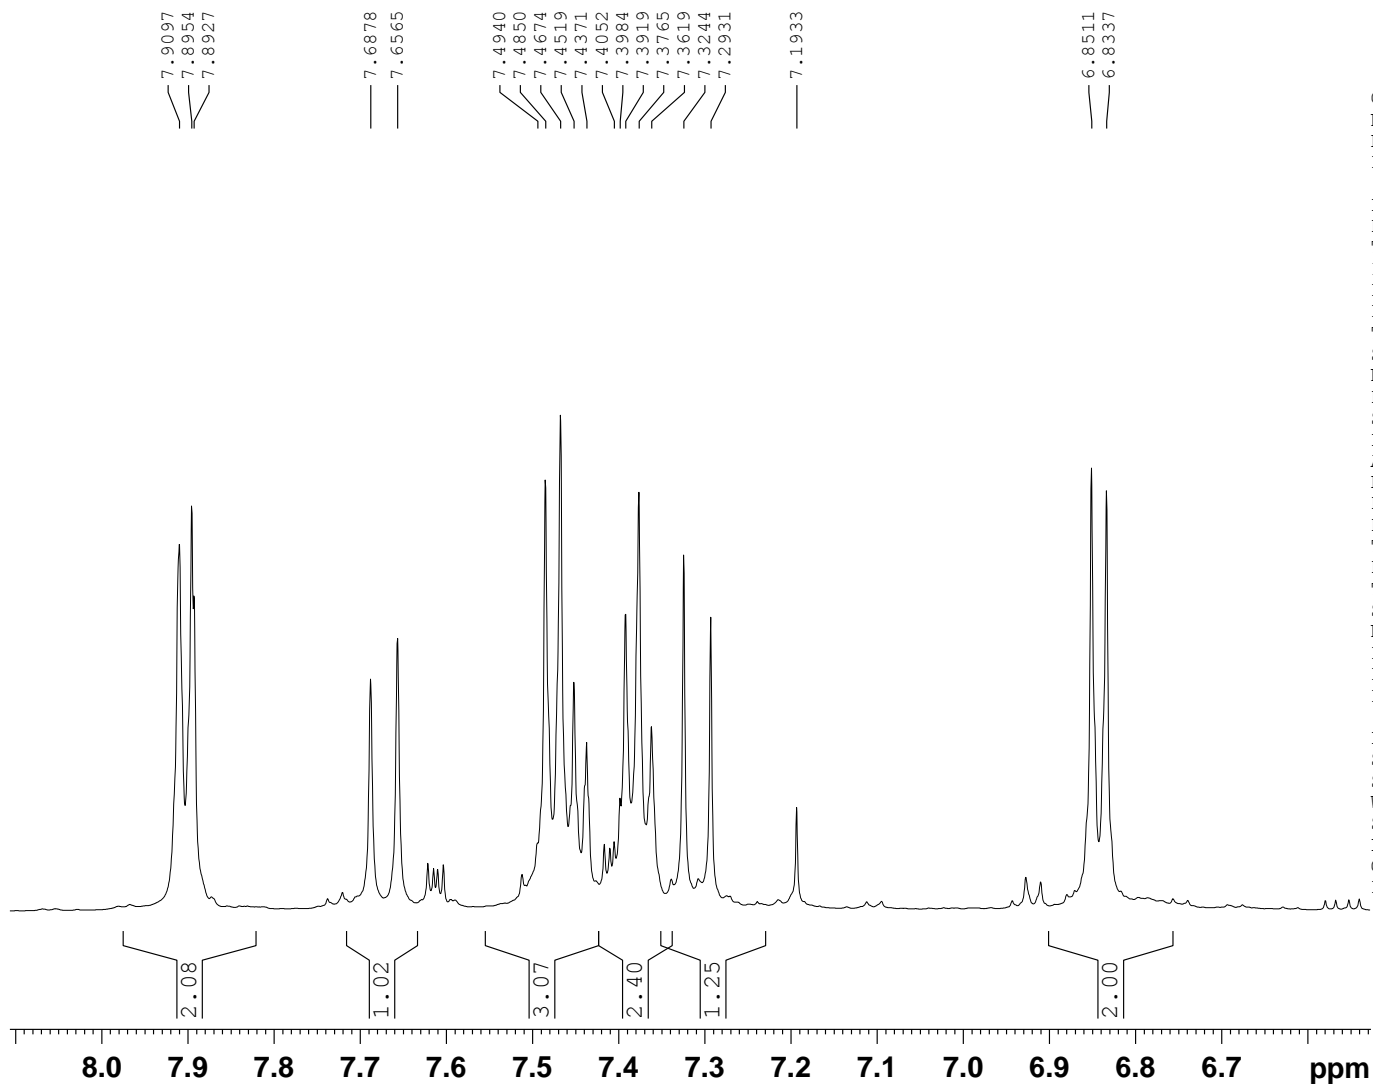

CH-O-1  
1H\_8scan CDCl3 {D:\Spectra} nmr 41

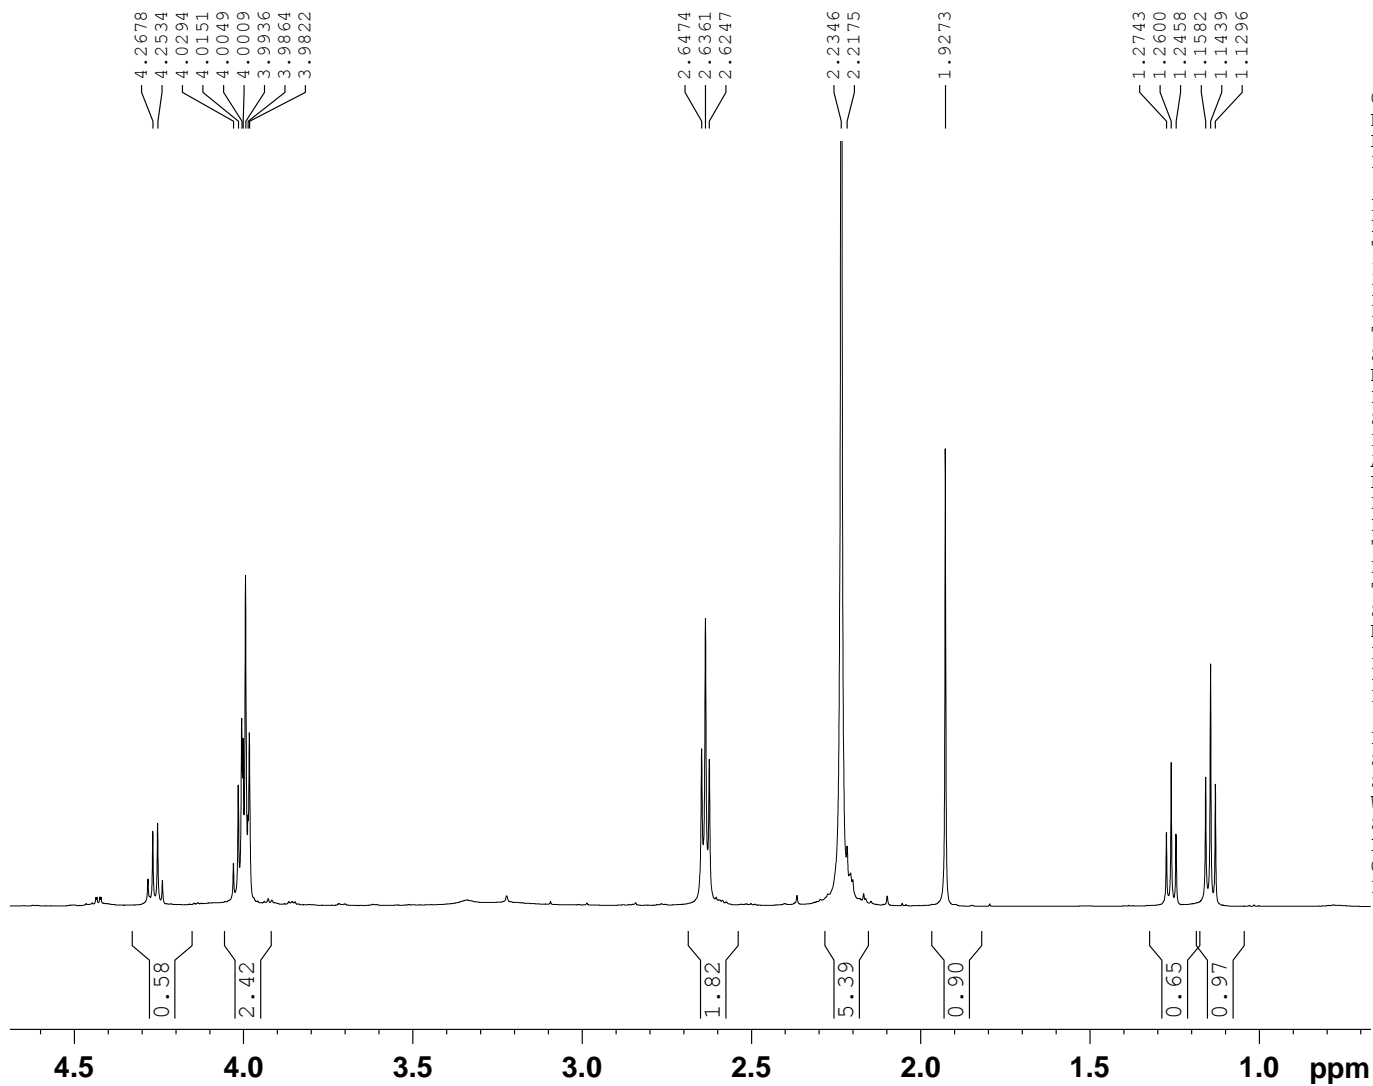

BRUKER  
AVANCE NEO  
500 MHz NMR  
SPECTROMETER  
SAIF, P.U.

Current Data Parameters  
NAME May05-2022  
EXPNO 410  
PROCNO 1

F2 - Acquisition Parameters  
Date\_ 20220505  
Time 15.56 h  
INSTRUM Avance Neo 500  
PROBHD Z119470\_0333 (PULPROG zg30)  
TD 65536  
SOLVENT CDCl3  
NS 16  
DS 0  
SWH 14705.883 Hz  
FIDRES 0.448788 Hz  
AQ 2.2282240 sec  
RG 28.3797  
DW 34.000 usec  
DE 6.79 usec  
TE 300.1 K  
D1 1.00000000 sec  
TD0 1  
SFO1 500.1730885 MHz  
NUC1 1H  
P0 3.33 usec  
P1 10.00 usec  
PLW1 20.93000031 W

F2 - Processing parameters  
SI 65536  
SF 500.1700452 MHz  
WDW EM  
SSB 0  
LB 0.30 Hz  
GB 0  
PC 1.00

CH-O-PS3  
C13CPD CDC13 {D:\Spectra} nmr 25

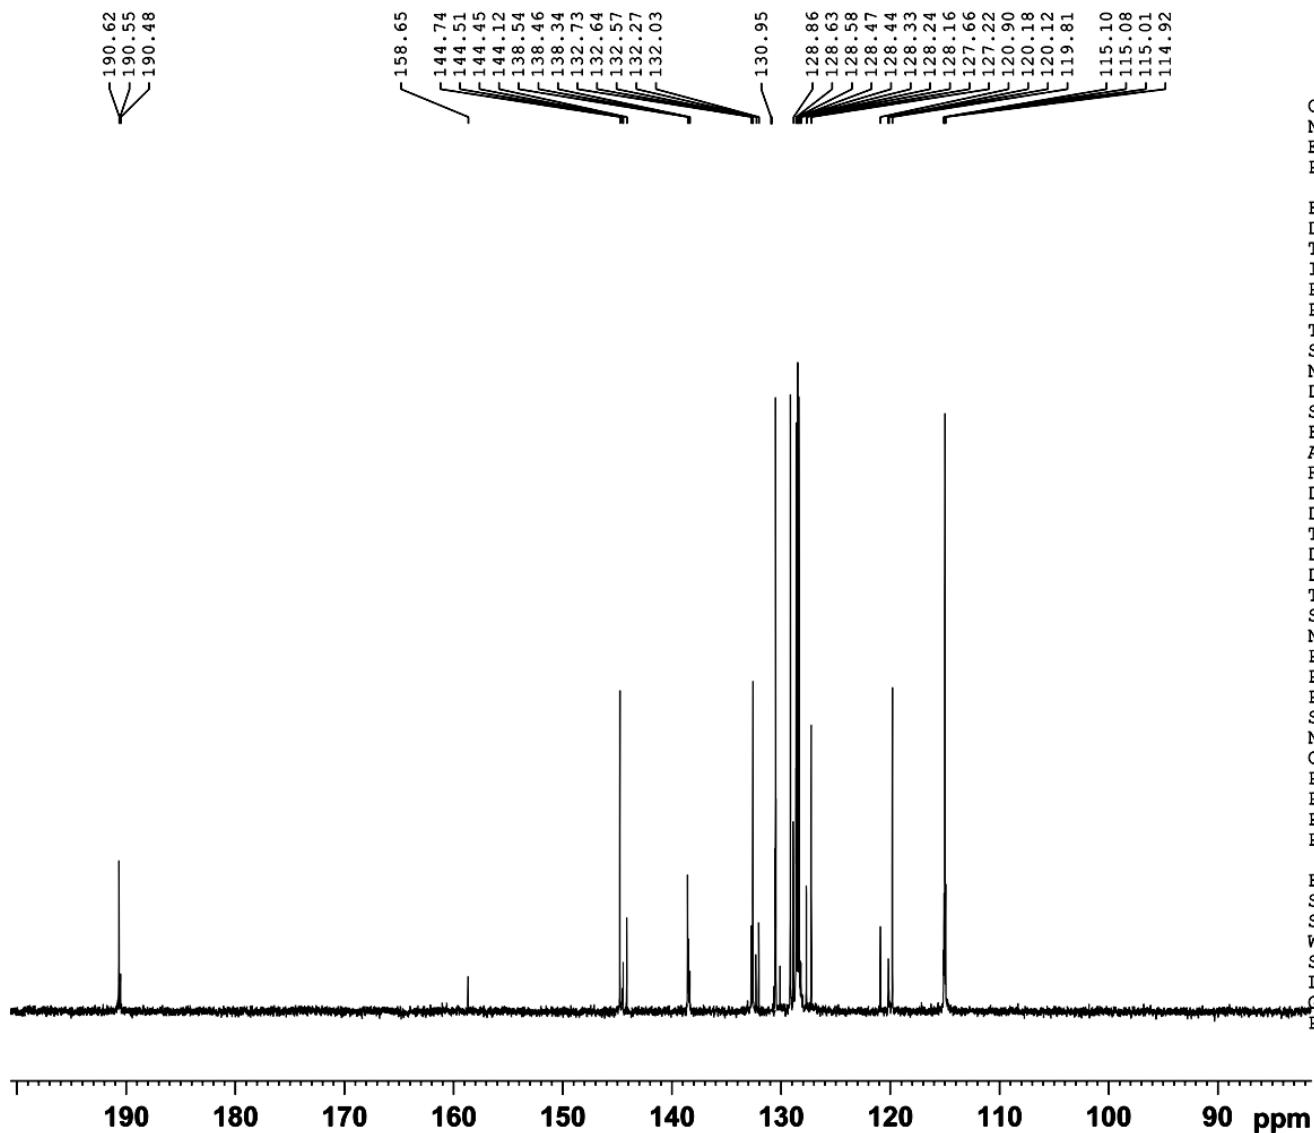

BRUKER  
AVANCE NEO  
500 MHz NMR SPECTROMETER  
SAIF, PANJAB UNIVERSITY,  
CHANDIGARH

Current Data Parameters  
NAME Mar31-2022  
EXPNO 251  
PROCNO 1

F2 - Acquisition Parameters  
Date\_ 20220331  
Time 17.35 h  
INSTRUM Avance Neo 500  
PROBHD Z119470\_0333 (  
PULPROG zgpg30  
TD 65536  
SOLVENT CDC13  
NS 1024  
DS 4  
SWH 37037.035 Hz  
FIDRES 1.130281 Hz  
AQ 0.8847360 sec  
RG 101  
DW 13.500 usec  
DE 6.50 usec  
TE 300.2 K  
D1 2.00000000 sec  
D11 0.03000000 sec  
TD0 1  
SFO1 125.7804233 MHz  
NUC1 13C  
P0 3.33 usec  
P1 10.00 usec  
PLW1 83.14099884 W  
SFO2 500.1720007 MHz  
NUC2 1H  
CPDPRG[2] waltz65  
PCPD2 80.00 usec  
PLW2 20.93000031 W  
PLW12 0.32703000 W  
PLW13 0.16449000 W

F2 - Processing parameters  
SI 32768  
SF 125.7678465 MHz  
WDW EM  
SSB 0  
LB 1.00 Hz  
GB 0  
PC 1.40

CH-O-PS3  
C13CPD CDC13 {D:\Spectra} nmr 25

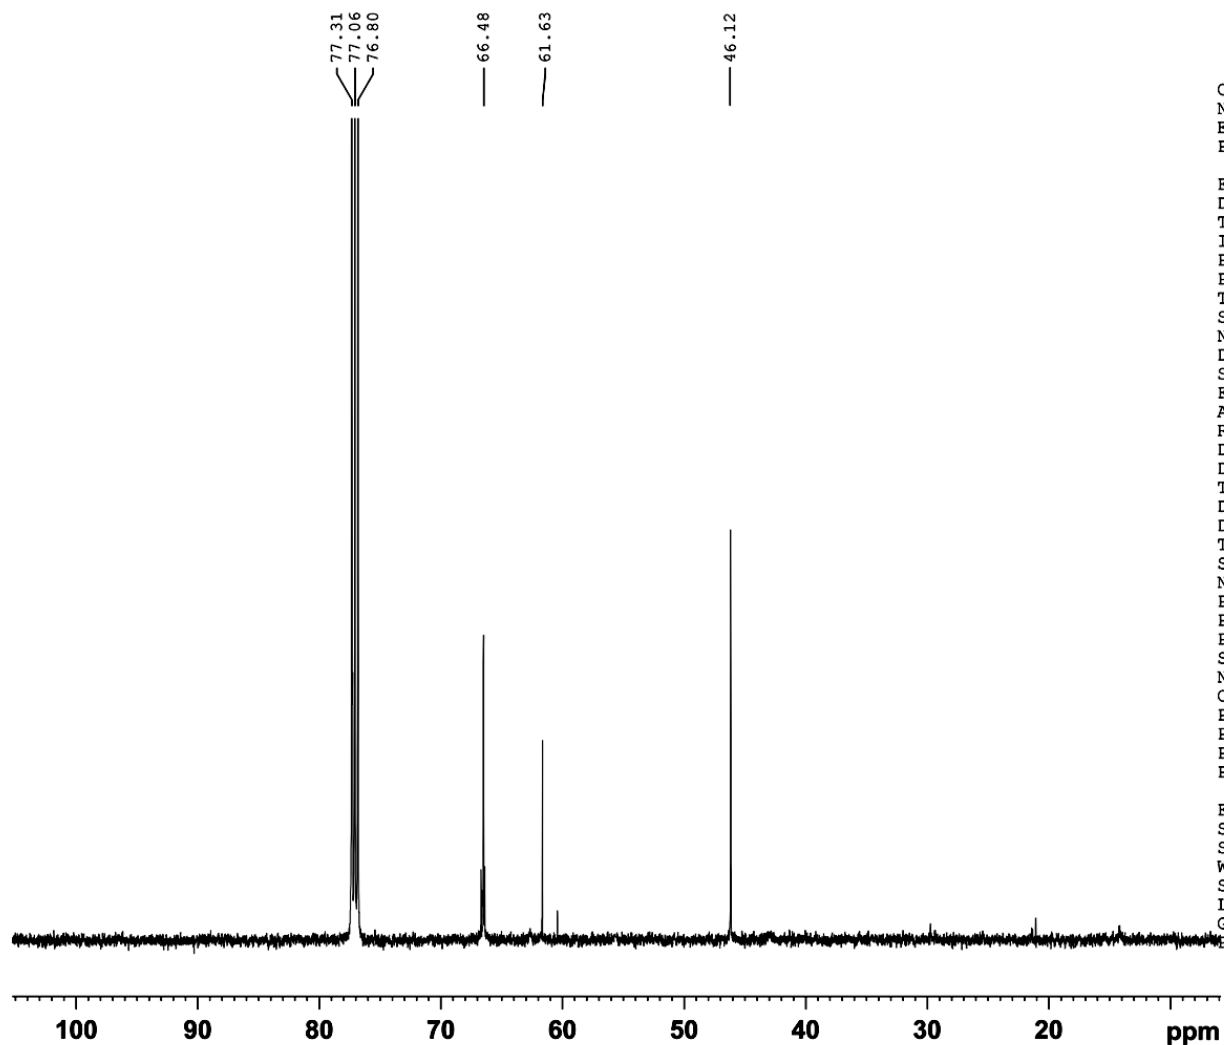

BRUKER  
AVANCE NEO  
500 MHz NMR SPECTROMETER  
SAIF, PANJAB UNIVERSITY,  
CHANDIGARH

Current Data Parameters  
NAME Mar31-2022  
EXPNO 251  
PROCNO 1

F2 - Acquisition Parameters  
Date\_ 20220331  
Time\_ 17.35 h  
INSTRUM Avance Neo 500  
PROBHD Z119470\_0333 (   
PULPROG zgpg30  
TD 65536  
SOLVENT CDCl3  
NS 1024  
DS 4  
SWH 37037.035 Hz  
FIDRES 1.130281 Hz  
AQ 0.8847360 sec  
RG 101  
DW 13.500 usec  
DE 6.50 usec  
TE 300.2 K  
D1 2.00000000 sec  
D11 0.03000000 sec  
TD0 1  
SFO1 125.7804233 MHz  
NUC1 13C  
P0 3.33 usec  
P1 10.00 usec  
PLW1 83.14099884 W  
SFO2 500.1720007 MHz  
NUC2 1H  
CPDPRG[2] waltz65  
PCPD2 80.00 usec  
PLW2 20.93000031 W  
PLW12 0.32703000 W  
PLW13 0.16449000 W

F2 - Processing parameters  
SI 32768  
SF 125.7678465 MHz  
WDW EM  
SSB 0  
LB 1.00 Hz  
GB 0  
PC 1.40

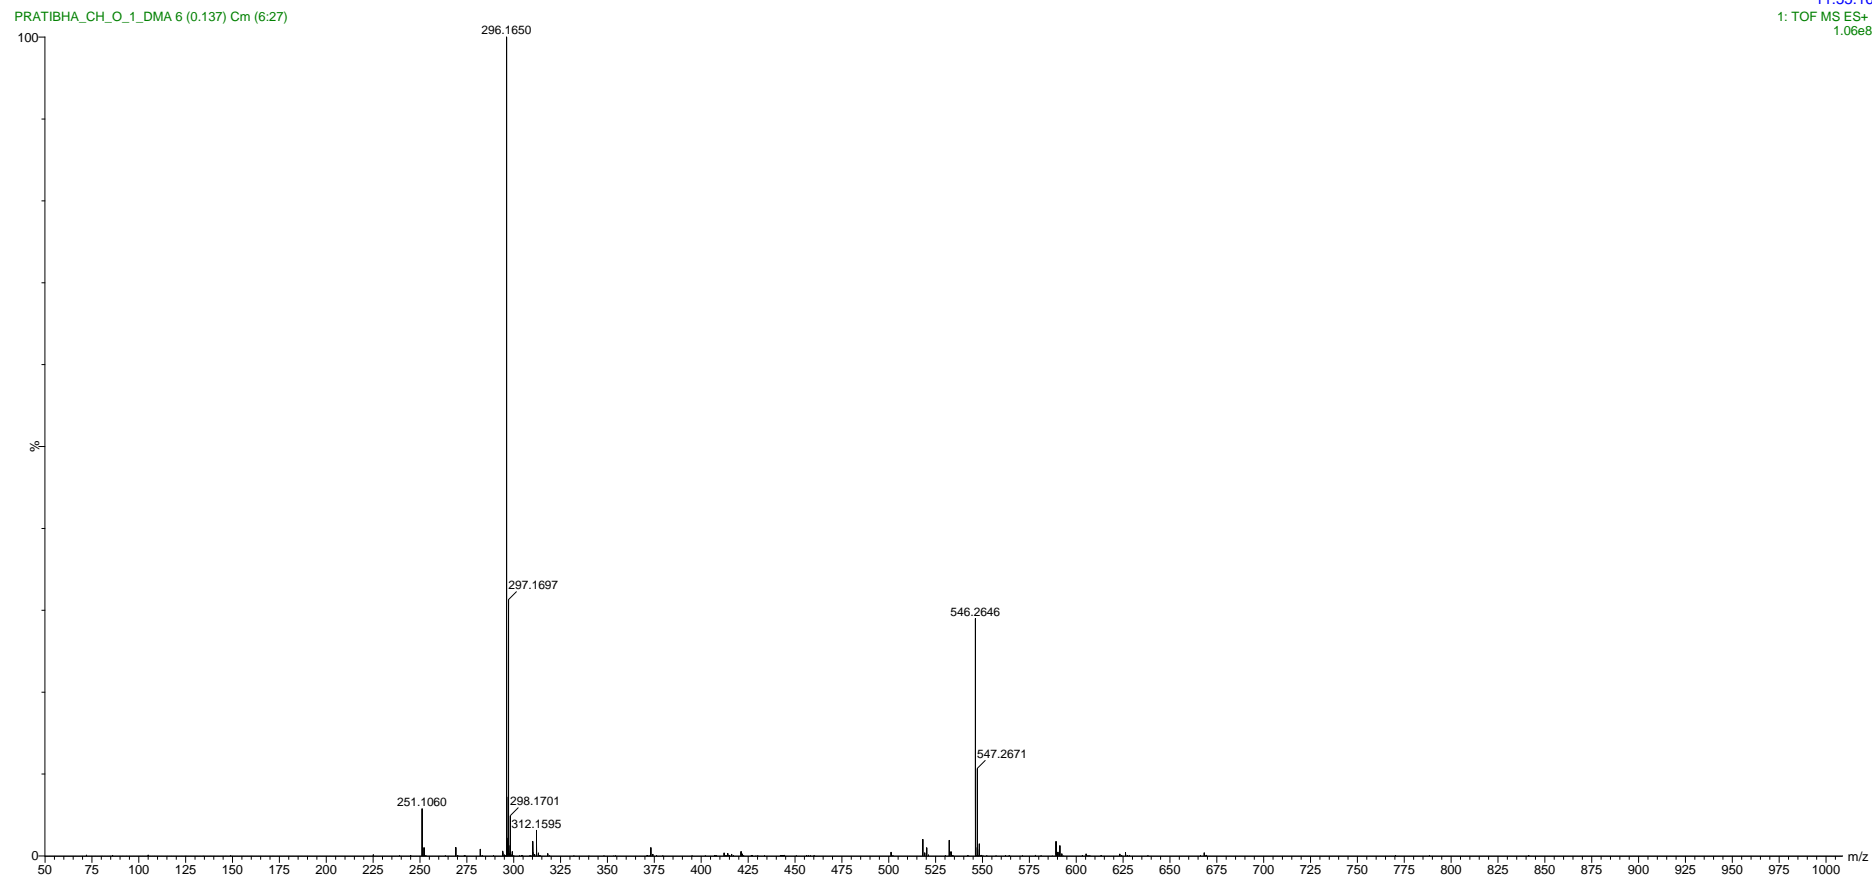



PRATIBHA\_CH\_O\_1\_DMA 6 (0.137) Cm (6:27)

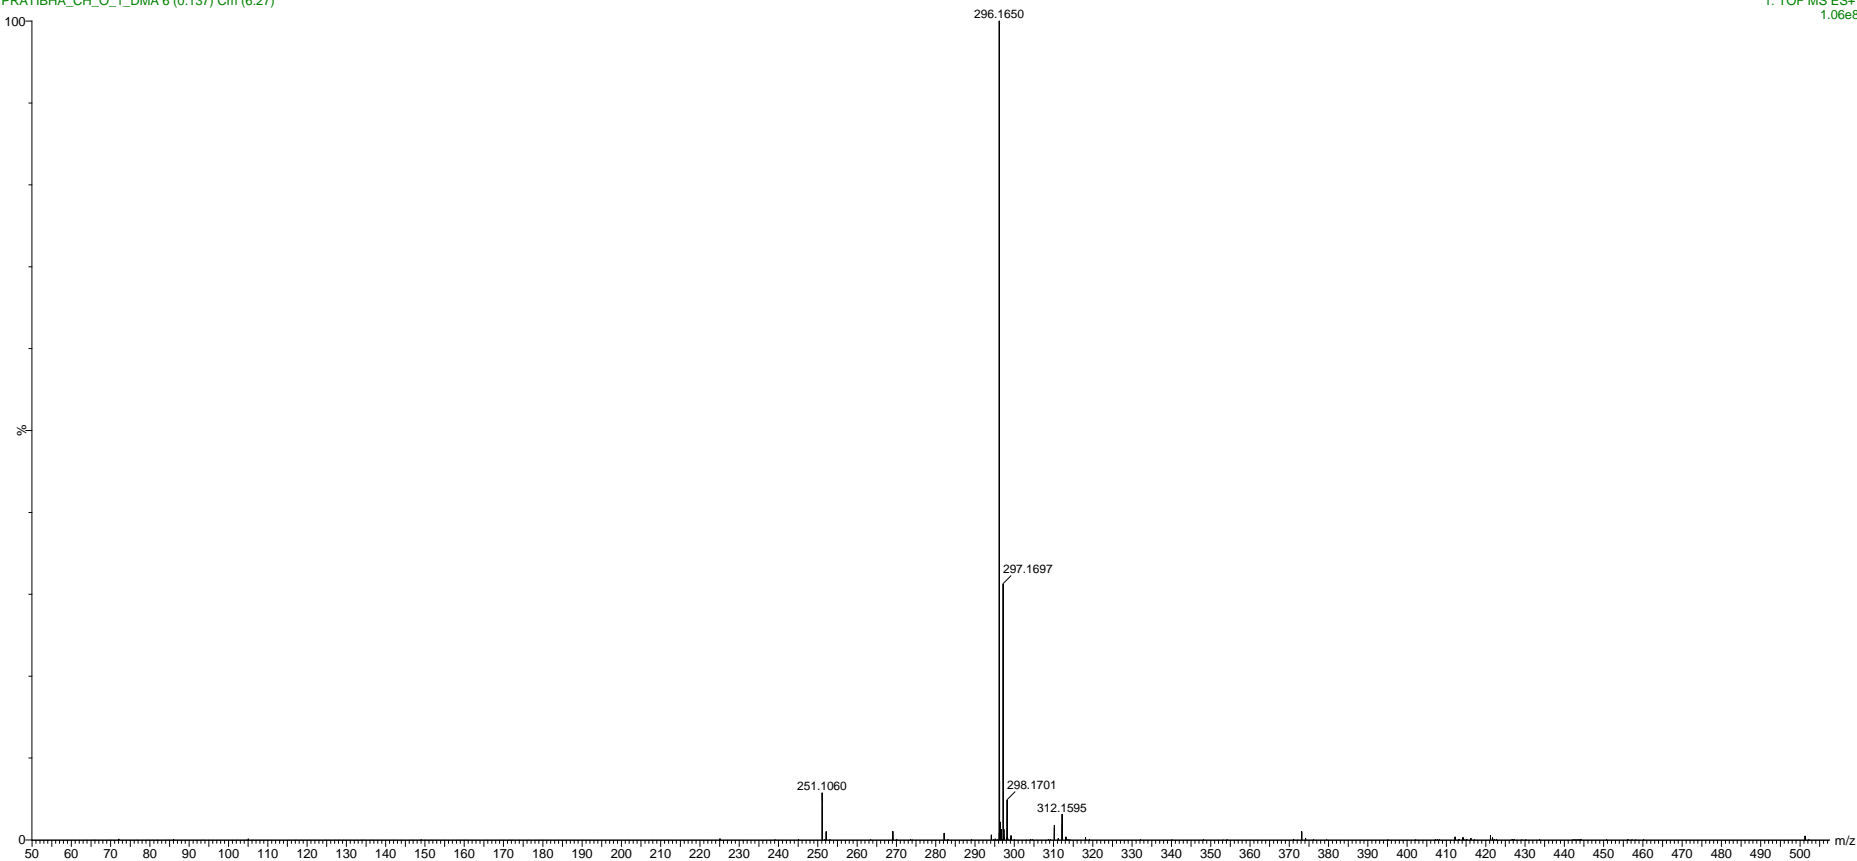

PRATIBHA\_CH\_O\_1\_DMA 6 (0.137) Cm (6:27)

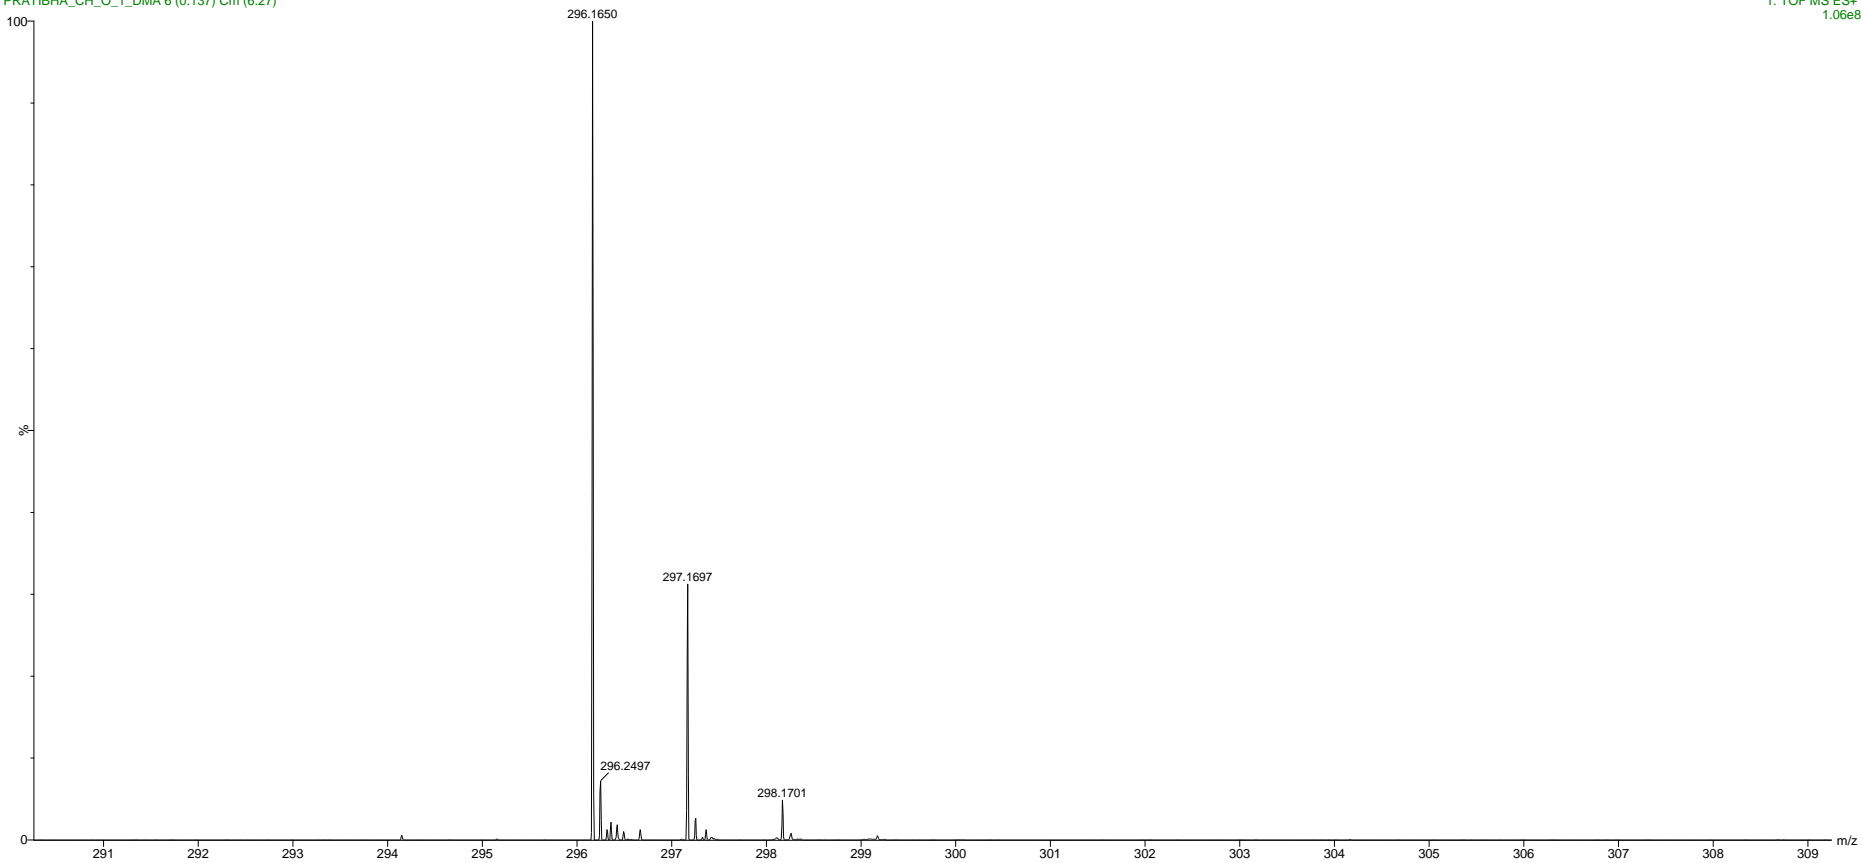

PS3

CH-O-4

1H\_8scan CDCl3 {D:\Spectra} nmr 42

BRUKER  
AVANCE NEO  
500 MHz NMR  
SPECTROMETER  
SAIF, P.U.

Current Data Parameters  
NAME May05-2022  
EXPNO 420  
PROCNO 1

F2 - Acquisition Parameters  
Date\_ 20220505  
Time 15.58 h  
INSTRUM Avance Neo 500  
PROBHD Z119470\_0333 (  
PULPROG zg30  
TD 65536  
SOLVENT CDCl3  
NS 16  
DS 0  
SWH 14705.883 Hz  
FIDRES 0.448788 Hz  
AQ 2.2282240 sec  
RG 95.7854  
DW 34.000 usec  
DE 6.79 usec  
TE 300.1 K  
D1 1.00000000 sec  
TD0 1  
SFO1 500.1730885 MHz  
NUC1 1H  
P0 3.33 usec  
P1 10.00 usec  
PLW1 20.93000031 W

F2 - Processing parameters  
SI 65536  
SF 500.1700490 MHz  
WDW EM  
SSB 0  
LB 0.30 Hz  
GB 0  
PC 1.00

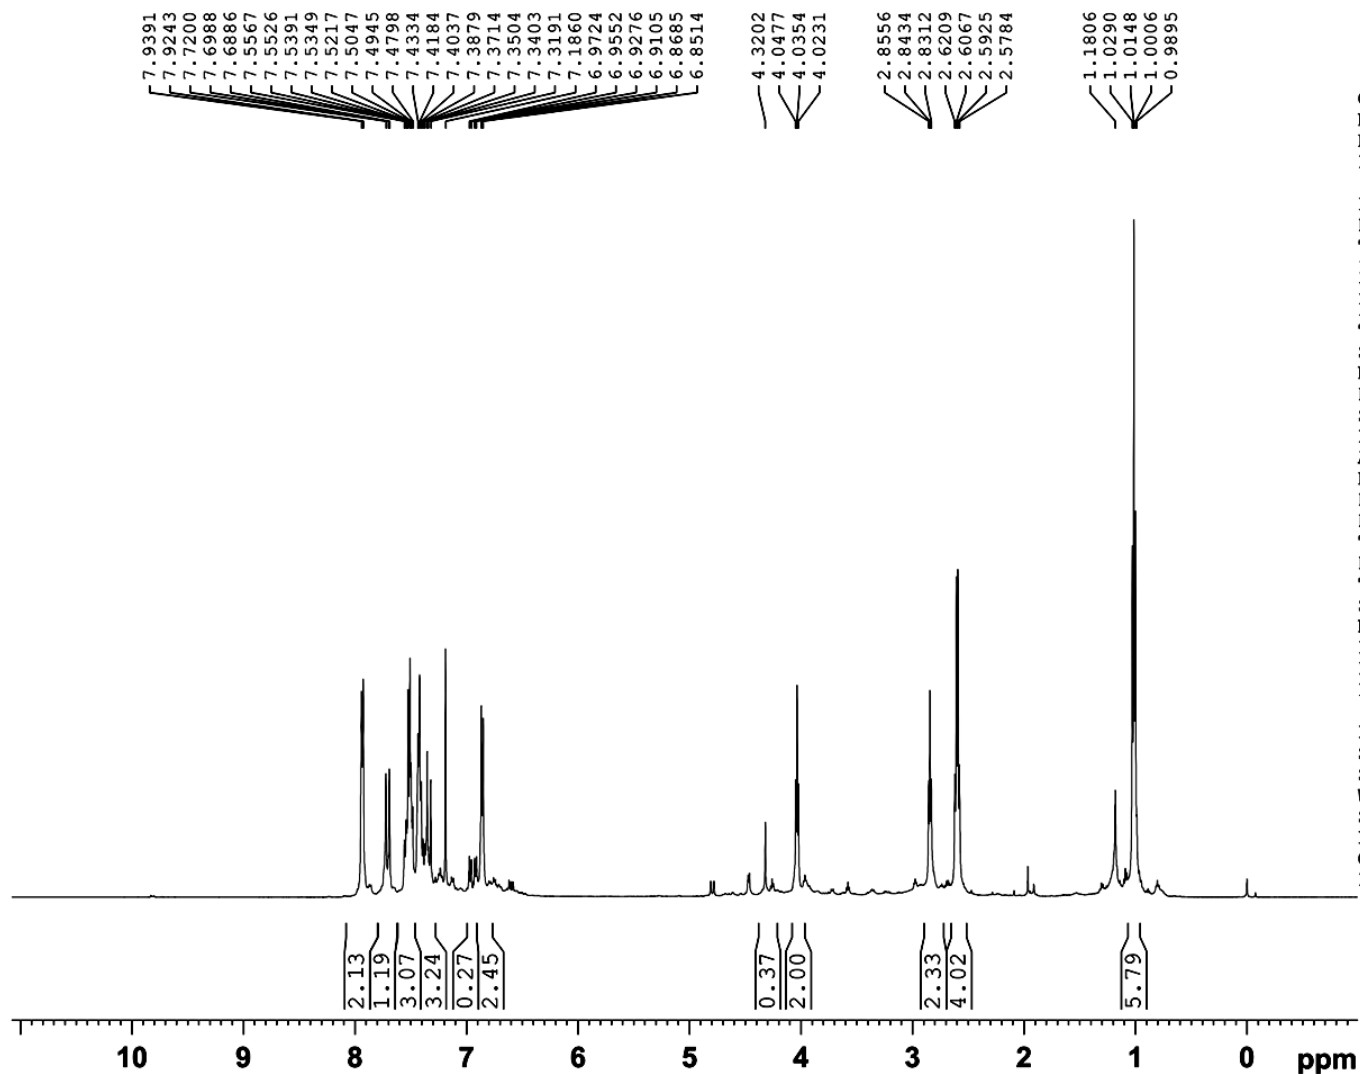

PS313  
C13CPD CDC13 {D:\Spectra} nmr 33

BRUKER  
AVANCE NEO  
500 MHz NMR SPECTROMETER  
SAIF, PANJAB UNIVERSITY,  
CHANDIGARH

Current Data Parameters  
NAME Sep15-2022  
EXPNO 331  
PROCNO 1

F2 - Acquisition Parameters  
Date\_ 20220915  
Time\_ 21.54 h  
INSTRUM Avance Neo 500  
PROBHD Z119470\_0333 (   
PULPROG zgpg30  
TD 65536  
SOLVENT CDC13  
NS 512  
DS 4  
SWH 37037.035 Hz  
FIDRES 1.130281 Hz  
AQ 0.8847360 sec  
RG 101  
DW 13.500 usec  
DE 6.50 usec  
TE 300.1 K  
D1 2.00000000 sec  
D11 0.03000000 sec  
TD0 1  
SFO1 125.7804233 MHz  
NUC1 13C  
P0 3.33 usec  
P1 10.00 usec  
PLW1 83.14099884 W  
SFO2 500.1720007 MHz  
NUC2 1H  
CPDPRG[2] waltz65  
PCPD2 80.00 usec  
PLW2 20.93000031 W  
PLW12 0.32703000 W  
PLW13 0.16449000 W

F2 - Processing parameters  
SI 32768  
SF 125.7678465 MHz  
WDW EM  
SSB 0  
LB 1.00 Hz  
GB 0  
PC 1.40

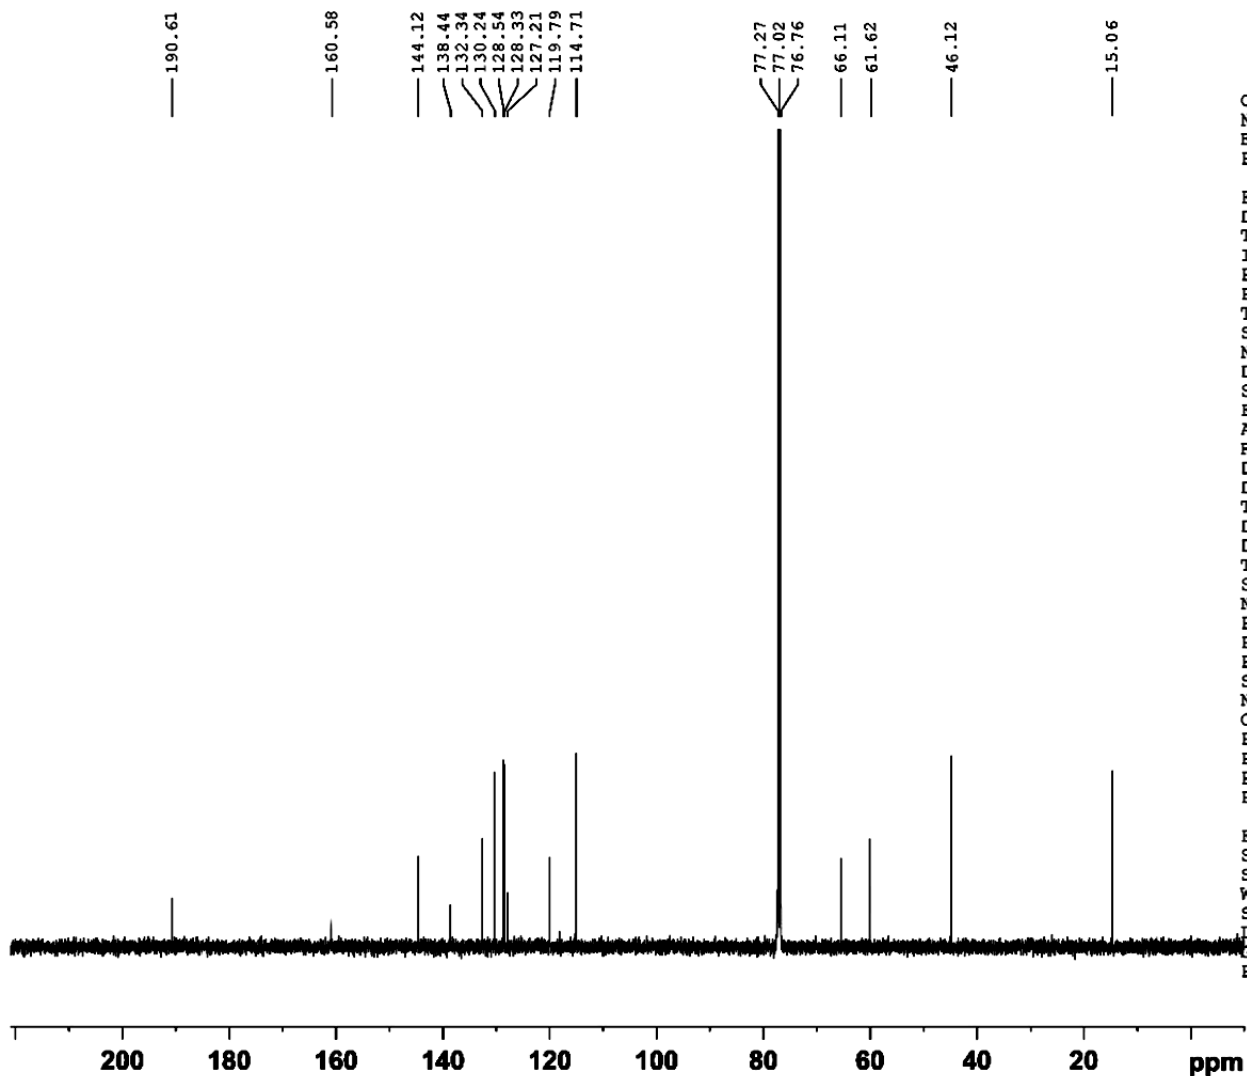

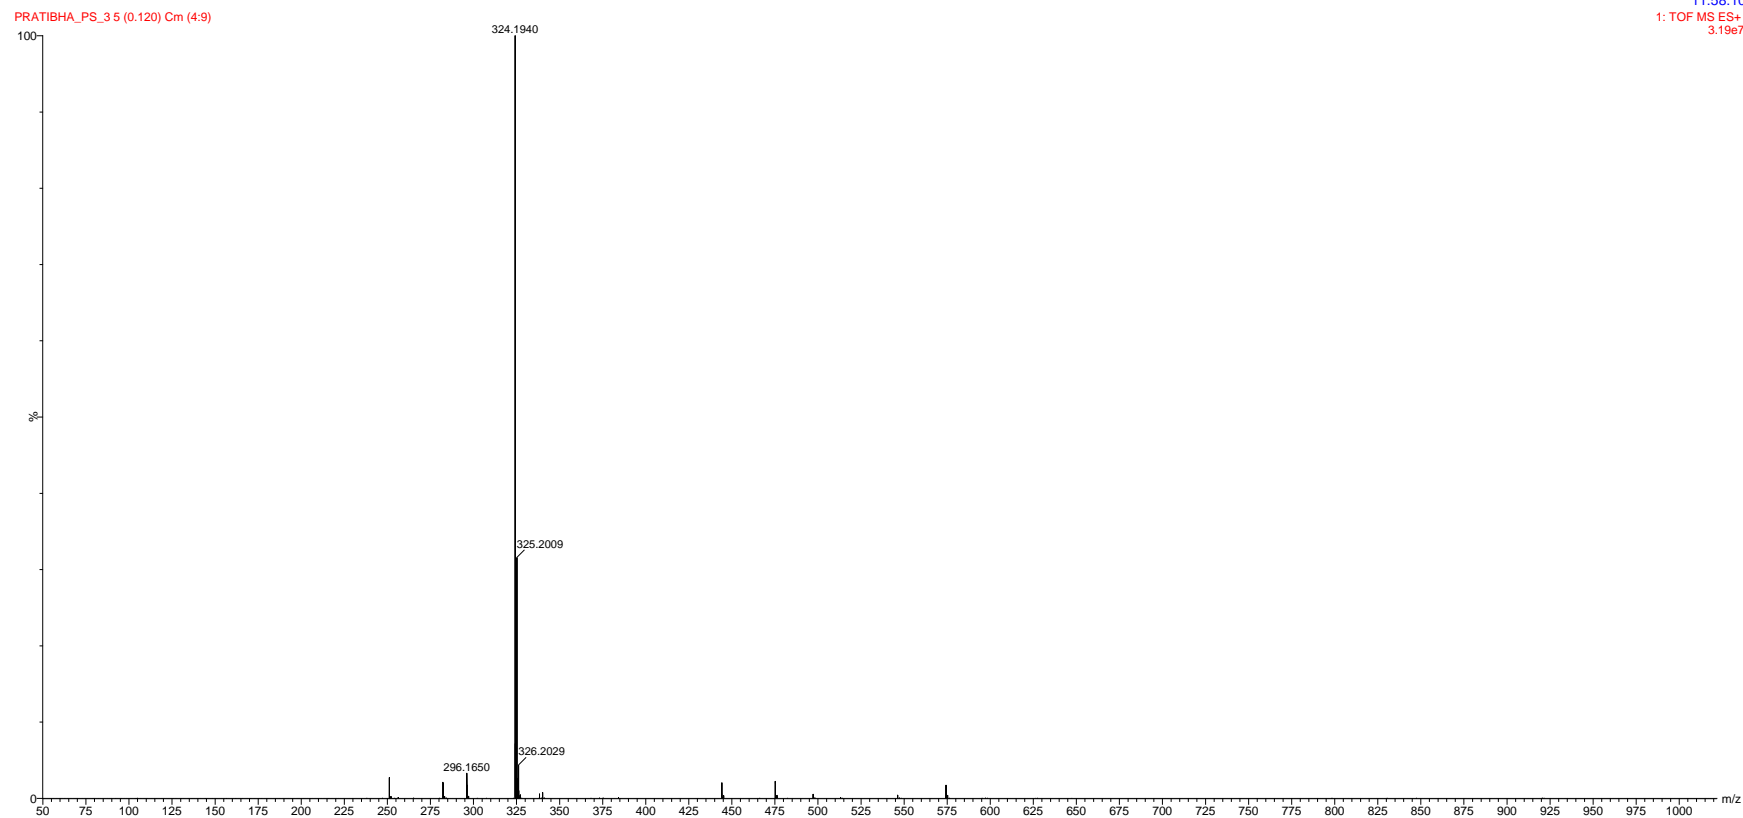

PRATIBHA\_PS\_3 5 (0.120) Cm (4:9)

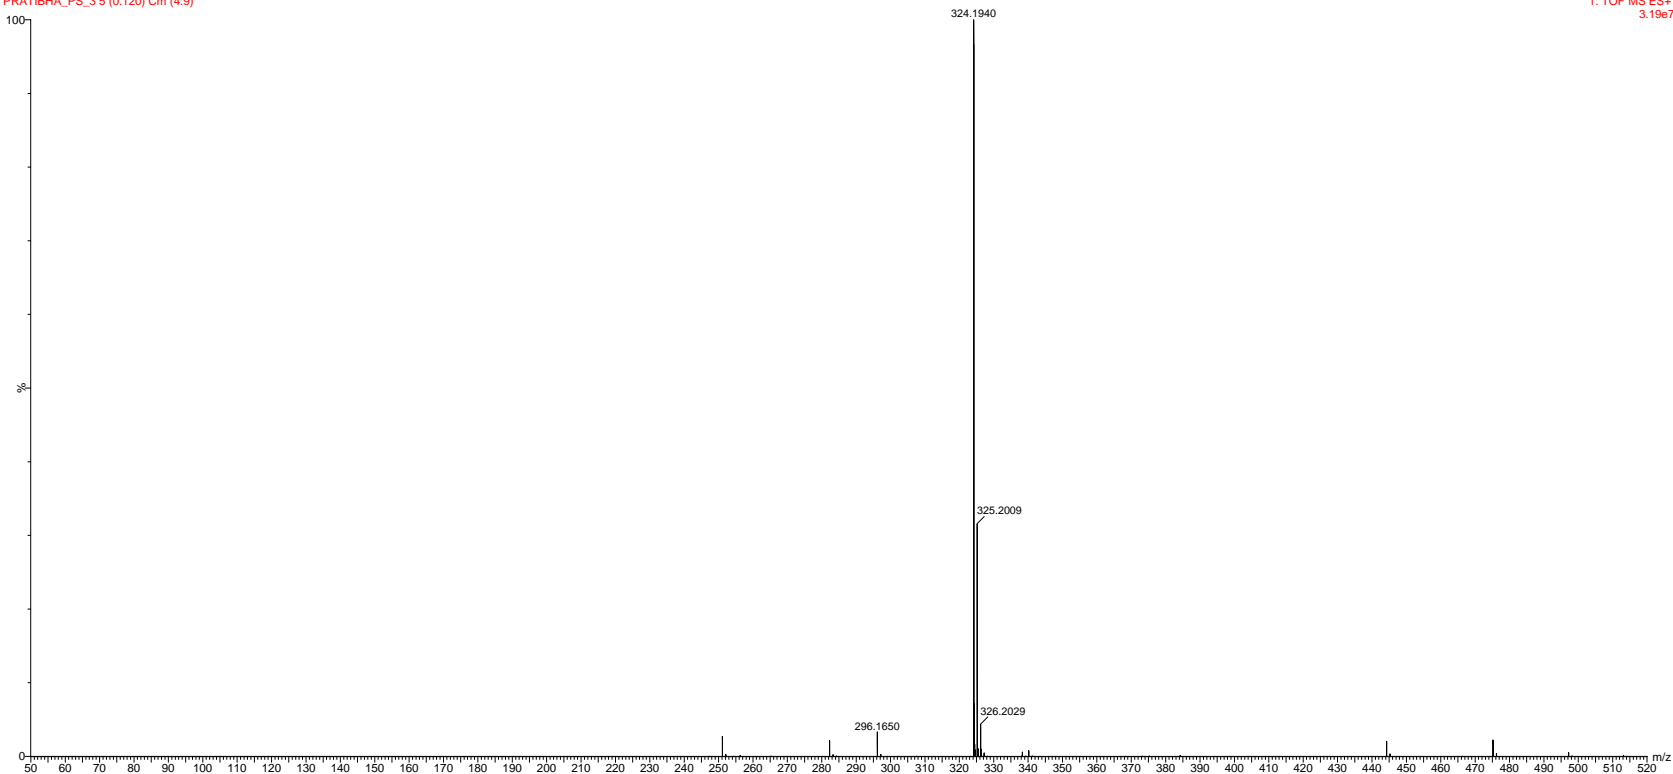

PS4

CH-O-3

1H\_8scan CDC13 {D:\Spectra} nmr 25

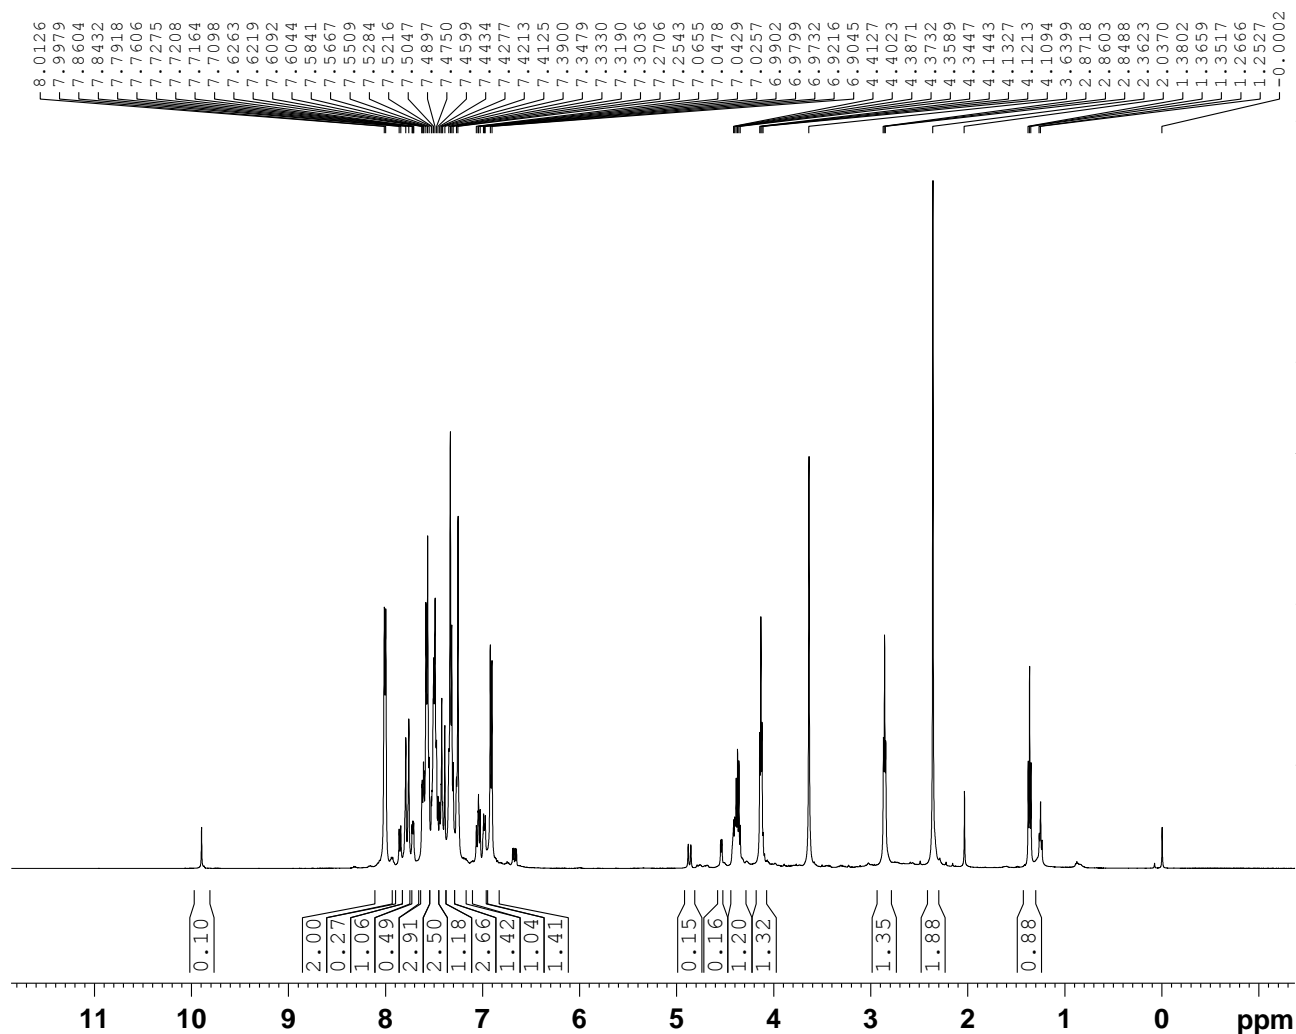

BRUKER  
AVANCE NEO  
500 MHz NMR  
SPECTROMETER  
SAIF, P.U.

Current Data Parameters  
NAME Mar31-2022  
EXPNO 250  
PROCNO 1

F2 - Acquisition Parameters  
Date\_ 20220331  
Time\_ 16.44 h  
INSTRUM Avance Neo 500  
PROBHD Z119470\_0333 (  
PULPROG zg30  
TD 65536  
SOLVENT CDCl3  
NS 16  
DS 0  
SWH 14705.883 Hz  
FIDRES 0.448788 Hz  
AQ 2.2282240 sec  
RG 95.7854  
DW 34.000 usec  
DE 6.79 usec  
TE 300.1 K  
D1 1.00000000 sec  
TD0 1  
SFO1 500.1730885 MHz  
NUC1 1H  
P0 3.33 usec  
P1 10.00 usec  
PLW1 20.93000031 W

F2 - Processing parameters  
SI 65536  
SF 500.1700148 MHz  
WDW EM  
SSB 0  
LB 0.30 Hz  
GB 0  
PC 1.00

CH-O-3

1H\_8scan CDC13 {D:\Spectra} nmr 25

BRUKER  
AVANCE NEO  
500 MHz NMR  
SPECTROMETER  
SAIF, P.U.

Current Data Parameters  
NAME Mar31-2022  
EXPNO 250  
PROCNO 1

F2 - Acquisition Parameters  
Date\_ 20220331  
Time\_ 16.44 h  
INSTRUM Avance Neo 500  
PROBHD Z119470\_0333 (  
PULPROG zg30  
TD 65536  
SOLVENT CDC13  
NS 16  
DS 0  
SWH 14705.883 Hz  
FIDRES 0.448788 Hz  
AQ 2.2282240 sec  
RG 95.7854  
DW 34.000 usec  
DE 6.79 usec  
TE 300.1 K  
D1 1.00000000 sec  
TD0 1  
SFO1 500.1730885 MHz  
NUC1 1H  
P0 3.33 usec  
P1 10.00 usec  
PLW1 20.93000031 W

F2 - Processing parameters  
SI 65536  
SF 500.1700148 MHz  
WDW EM  
SSB 0  
LB 0.30 Hz  
GB 0  
PC 1.00

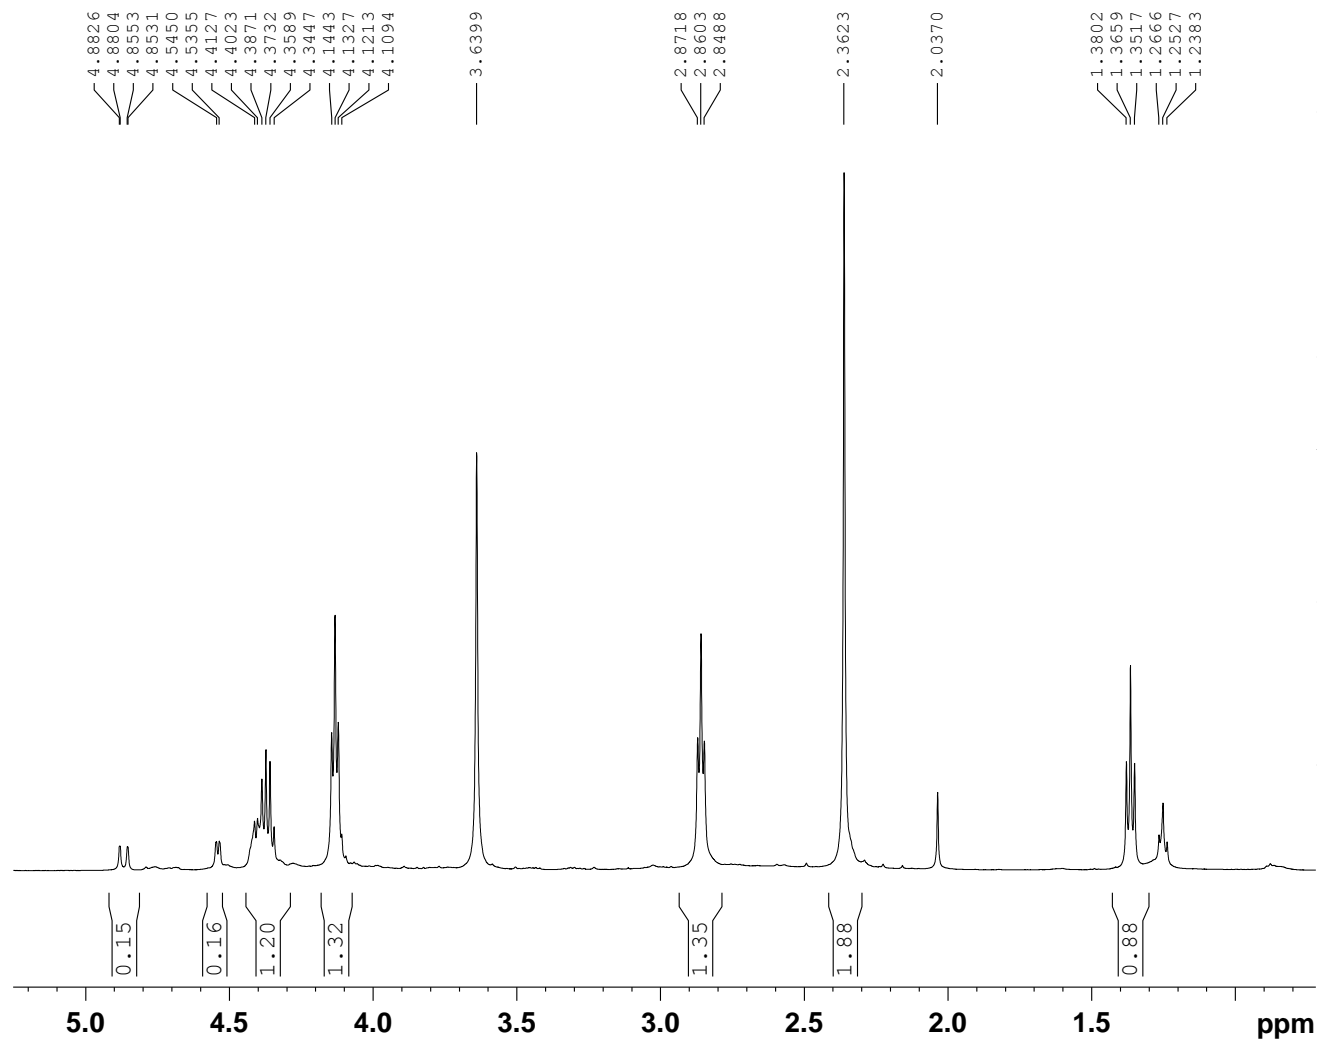



CH-O-3  
C13CPD CDC13 {D:\Spectra} nmr 25

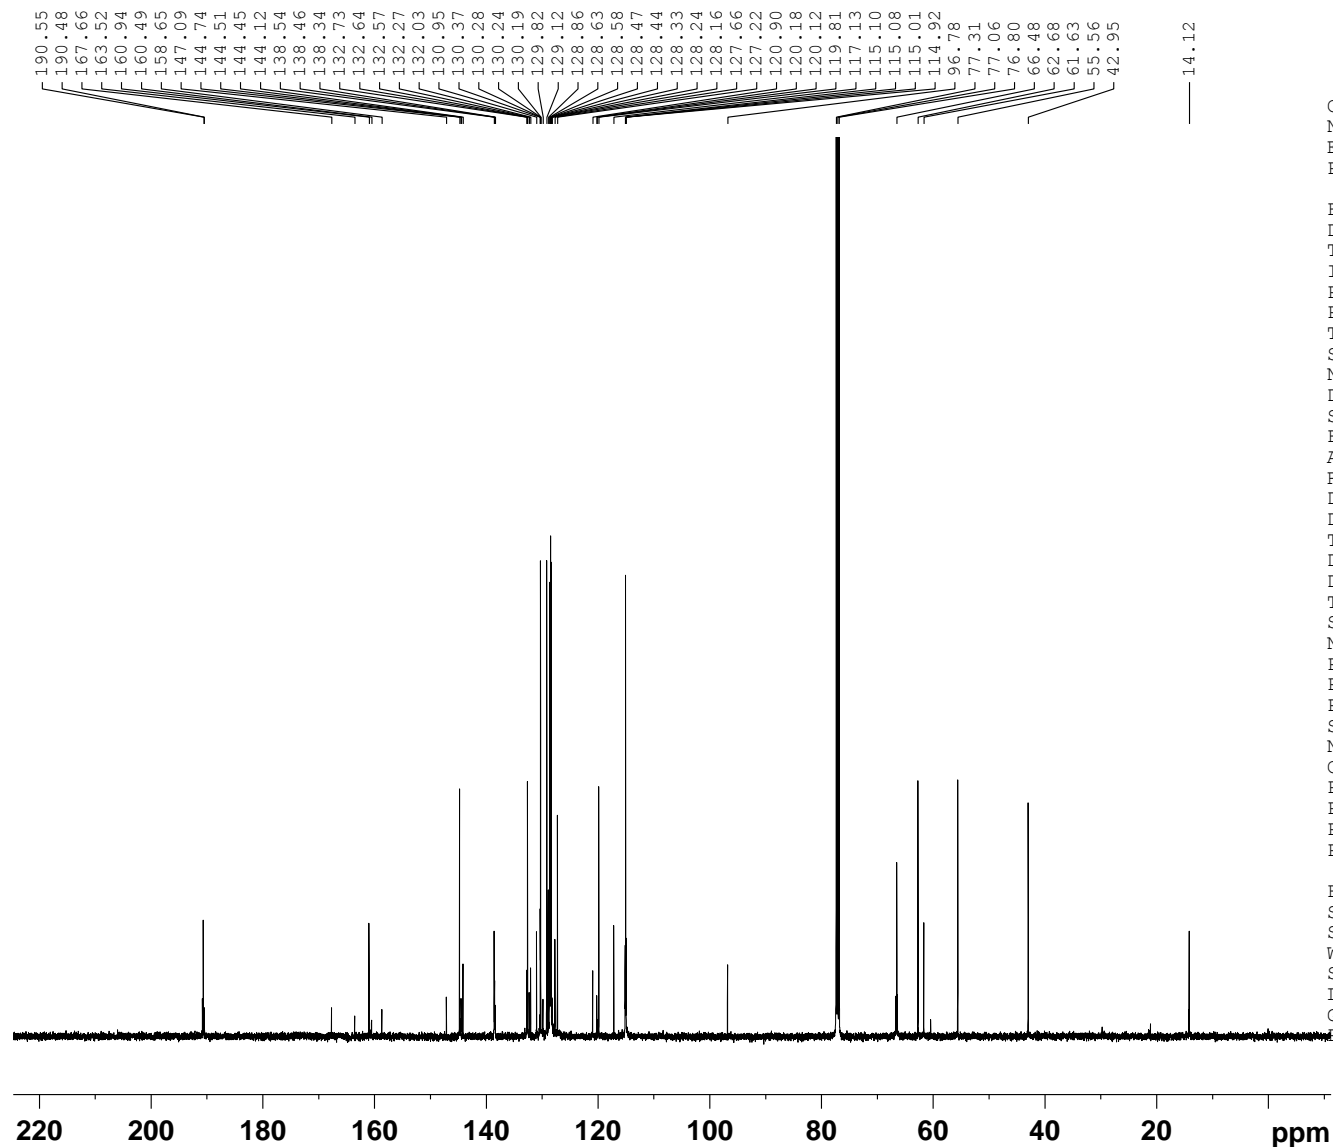

BRUKER  
AVANCE NEO  
500 MHz NMR SPECTROMETER  
SAIF, PANJAB UNIVERSITY,  
CHANDIGARH

Current Data Parameters  
NAME Mar31-2022  
EXPNO 251  
PROCNO 1

F2 - Acquisition Parameters  
Date\_ 20220331  
Time\_ 17.35 h  
INSTRUM Avance Neo 500  
PROBHD Z119470\_0333 (   
PULPROG zgpg30  
TD 65536  
SOLVENT CDCl3  
NS 1024  
DS 4  
SWH 37037.035 Hz  
FIDRES 1.130281 Hz  
AQ 0.8847360 sec  
RG 101  
DW 13.500 usec  
DE 6.50 usec  
TE 300.2 K  
D1 2.00000000 sec  
D11 0.03000000 sec  
TD0 1  
SFO1 125.7804233 MHz  
NUC1 13C  
P0 3.33 usec  
P1 10.00 usec  
PLW1 83.14099884 W  
SFO2 500.1720007 MHz  
NUC2 1H  
CPDPRG[2] waltz65  
PCPD2 80.00 usec  
PLW2 20.93000031 W  
PLW12 0.32703000 W  
PLW13 0.16449000 W

F2 - Processing parameters  
SI 32768  
SF 125.7678465 MHz  
WDW EM  
SSB 0  
LB 1.00 Hz  
GB 0  
PC 1.40



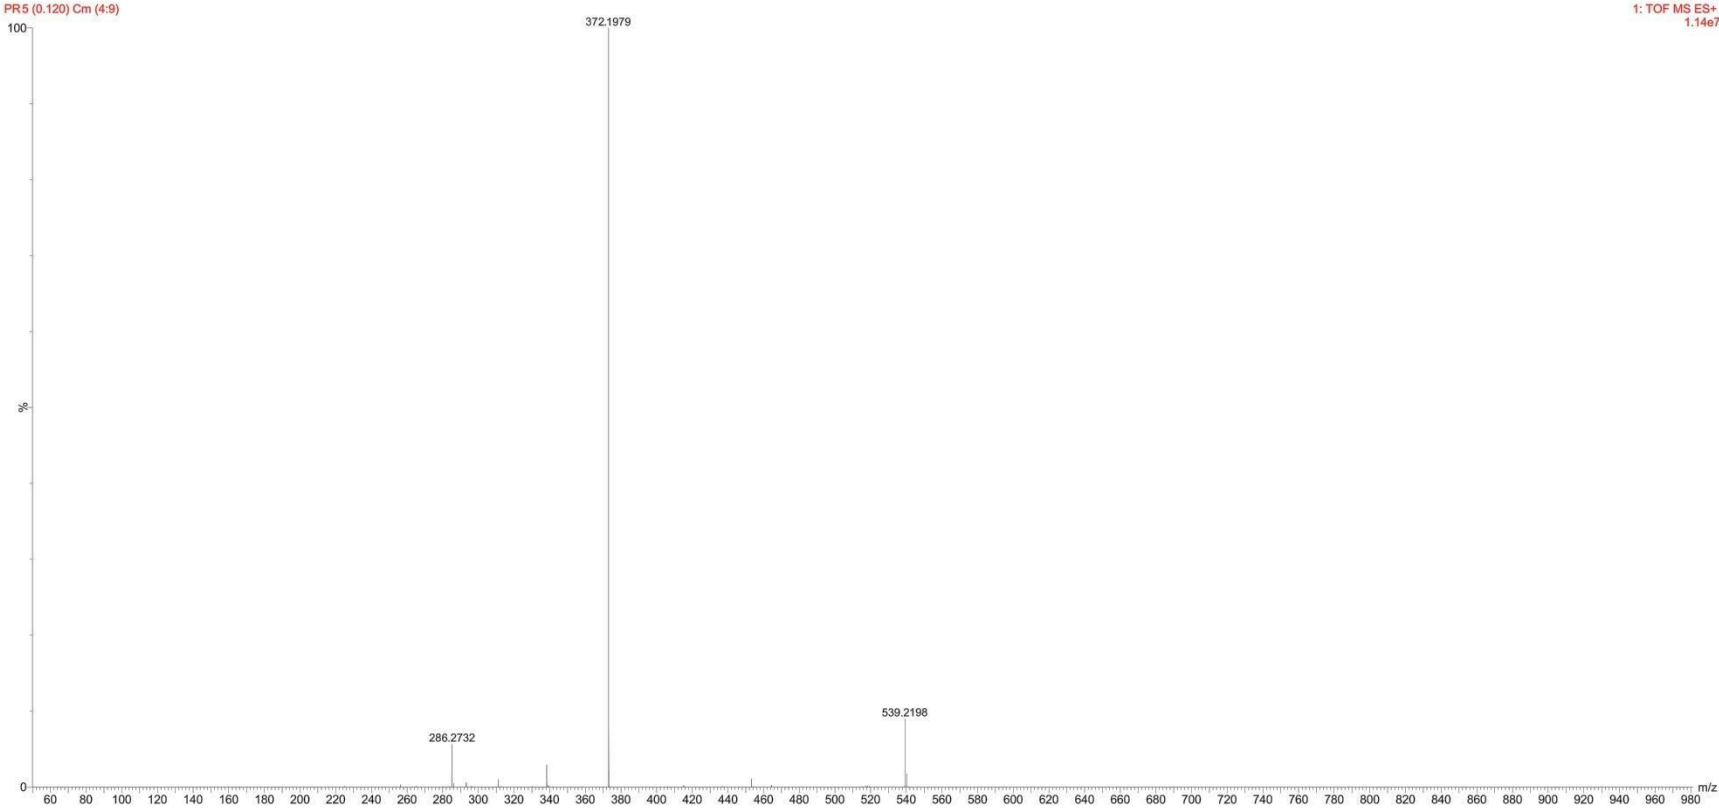

PS5

CH-O-5

1H\_8scan CDC13 {D:\Spectra} nmr 26

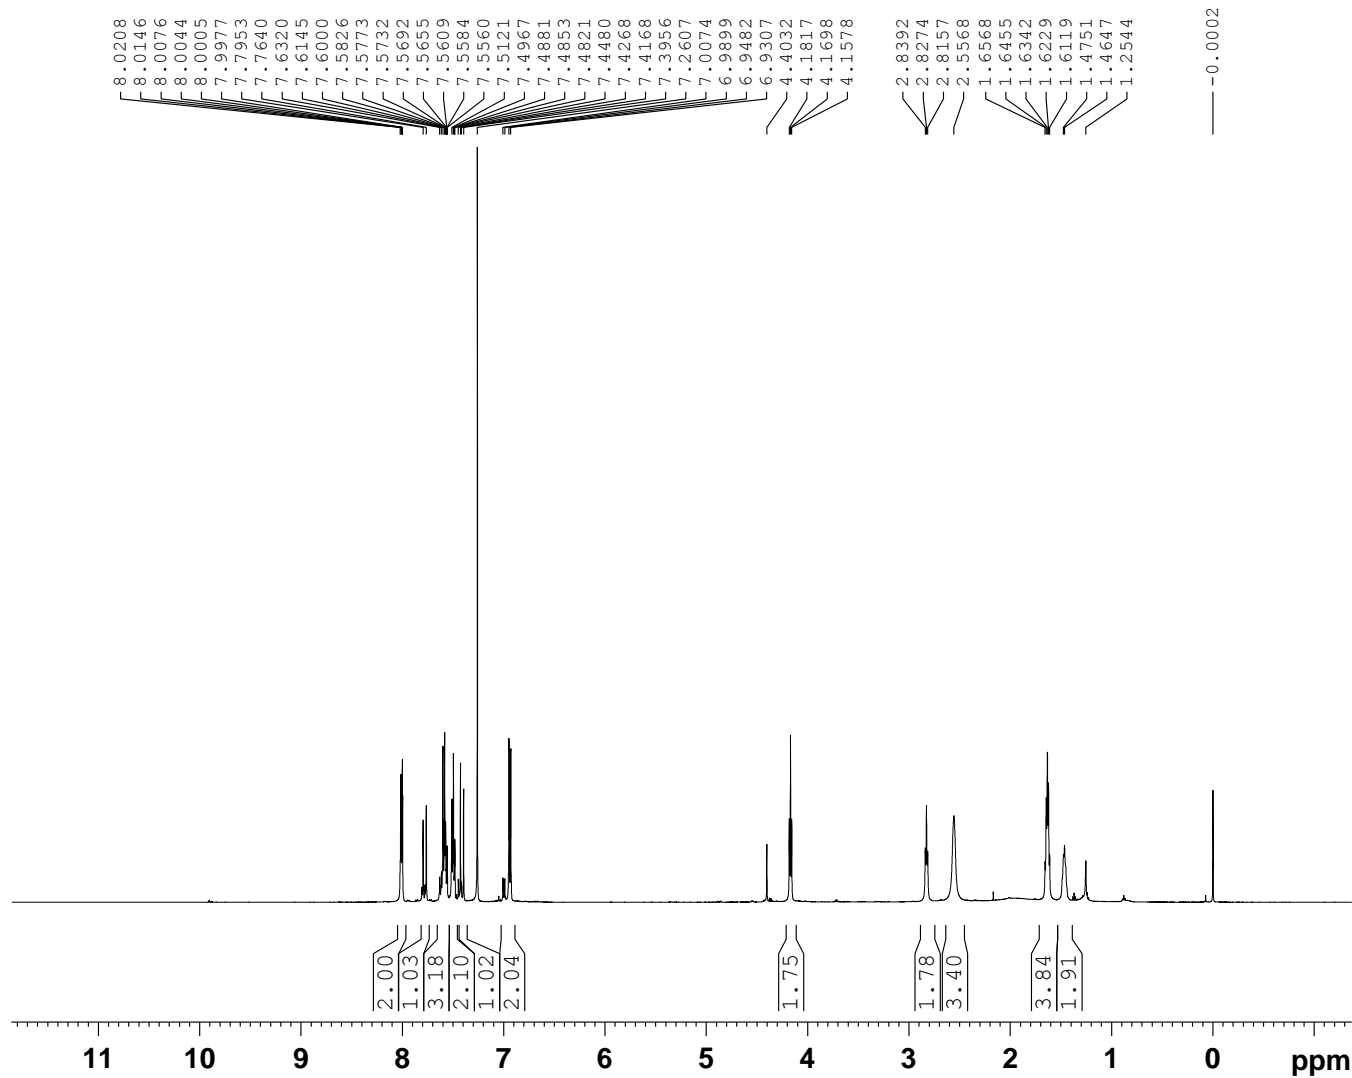

BRUKER  
AVANCE NEO  
500 MHz NMR  
SPECTROMETER  
SAIF, P.U.

Current Data Parameters  
NAME Mar31-2022  
EXPNO 260  
PROCNO 1

F2 - Acquisition Parameters  
Date\_ 20220331  
Time 17.38 h  
INSTRUM Avance Neo 500  
PROBHD Z119470\_0333 (  
PULPROG zg30  
TD 65536  
SOLVENT CDCl3  
NS 16  
DS 0  
SWH 14705.883 Hz  
FIDRES 0.448788 Hz  
AQ 2.2282240 sec  
RG 101  
DW 34.000 usec  
DE 6.79 usec  
TE 300.2 K  
D1 1.00000000 sec  
TD0 1  
SFO1 500.1730885 MHz  
NUC1 1H  
P0 3.33 usec  
P1 10.00 usec  
PLW1 20.93000031 W

F2 - Processing parameters  
SI 65536  
SF 500.1700117 MHz  
WDW EM  
SSB 0  
LB 0.30 Hz  
GB 0  
PC 1.00

CH-O-5

1H\_8scan CDCl3 {D:\Spectra} nmr 26

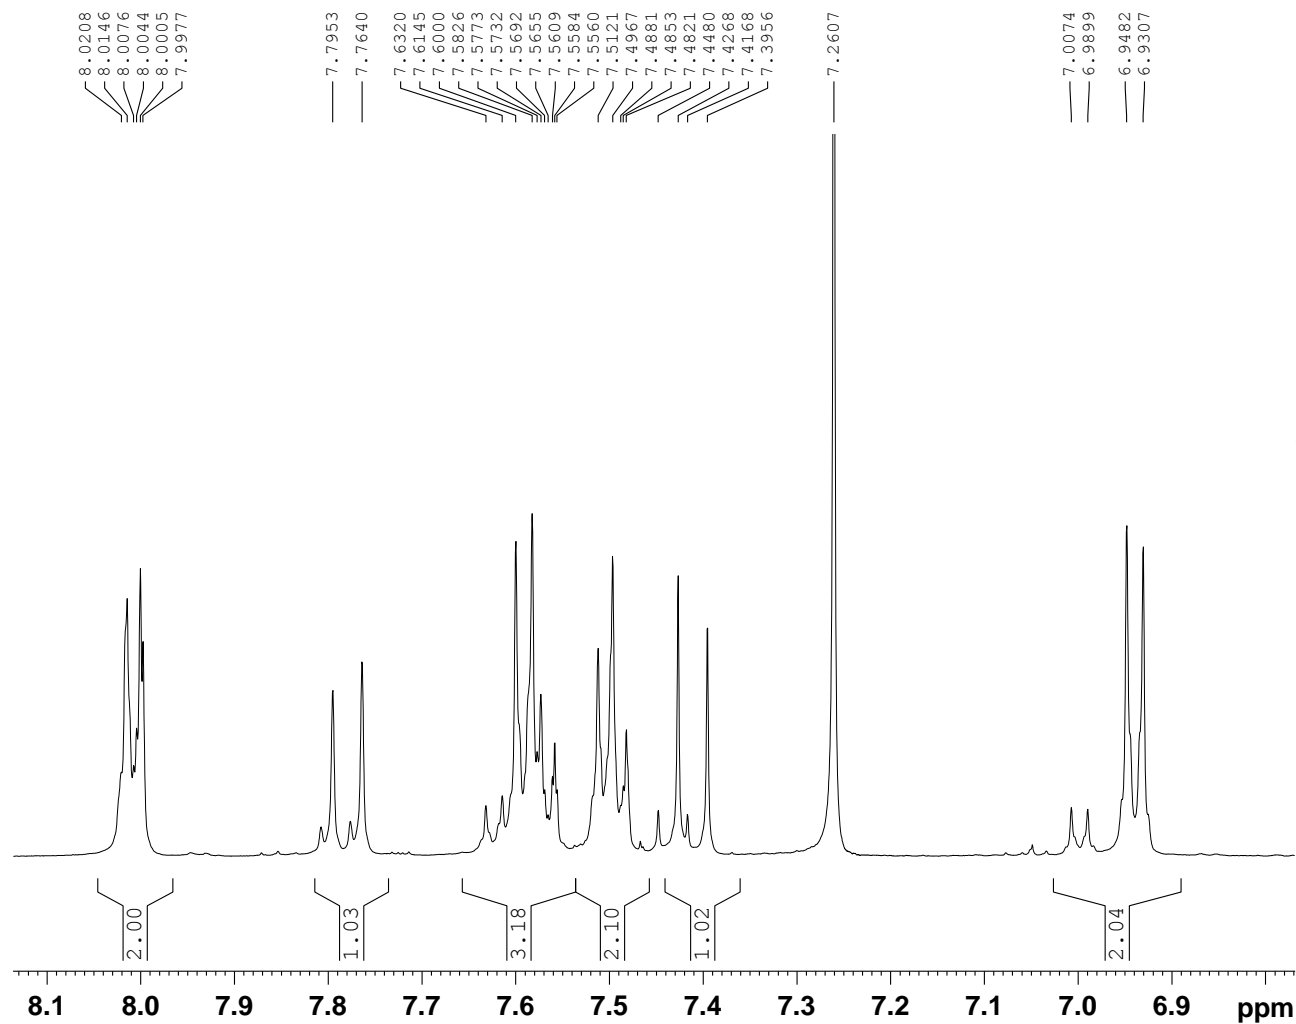

BRUKER  
AVANCE NEO  
500 MHz NMR  
SPECTROMETER  
SAIF, P.U.

Current Data Parameters  
NAME Mar31-2022  
EXPNO 260  
PROCNO 1

F2 - Acquisition Parameters  
Date\_ 20220331  
Time 17.38 h  
INSTRUM Avance Neo 500  
PROBHD Z119470\_0333 (  
PULPROG zg30  
TD 65536  
SOLVENT CDCl3  
NS 16  
DS 0  
SWH 14705.883 Hz  
FIDRES 0.448788 Hz  
AQ 2.2282240 sec  
RG 101  
DW 34.000 usec  
DE 6.79 usec  
TE 300.2 K  
D1 1.00000000 sec  
TD0 1  
SFO1 500.1730885 MHz  
NUC1 1H  
P0 3.33 usec  
P1 10.00 usec  
PLW1 20.93000031 W

F2 - Processing parameters  
SI 65536  
SF 500.1700117 MHz  
WDW EM  
SSB 0  
LB 0.30 Hz  
GB 0  
PC 1.00

CH-O-5  
1H\_8scan CDC13 {D:\Spectra} nmr 26

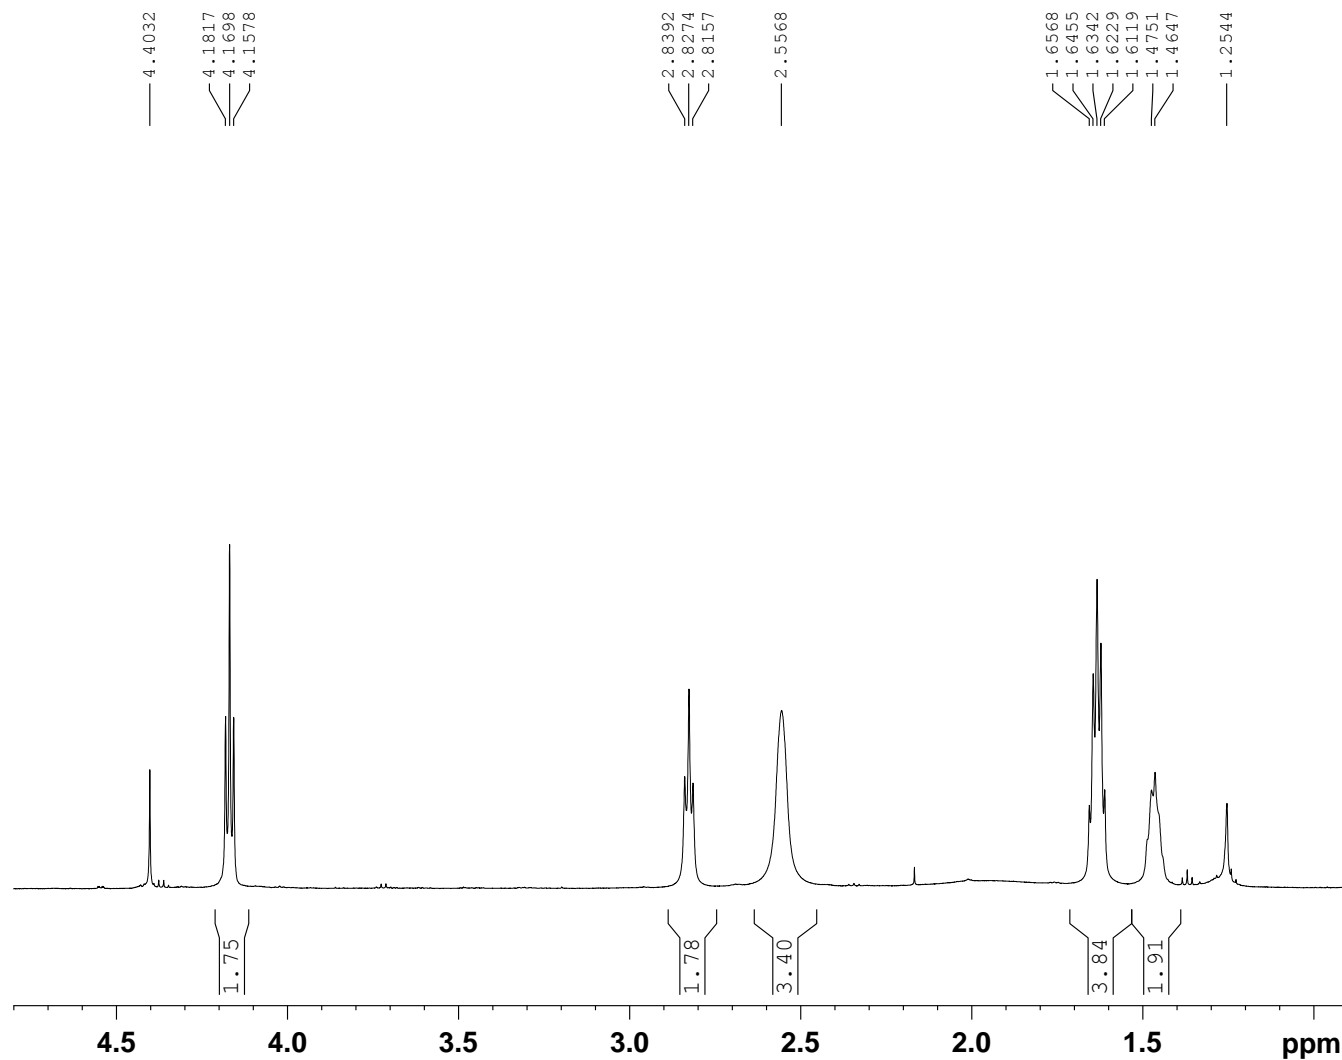

BRUKER  
AVANCE NEO  
500 MHz NMR  
SPECTROMETER  
SAIF, P.U.

Current Data Parameters  
NAME Mar31-2022  
EXPNO 260  
PROCNO 1

F2 - Acquisition Parameters  
Date\_ 20220331  
Time\_ 17.38 h  
INSTRUM Avance Neo 500  
PROBHD Z119470\_0333 (  
PULPROG zg30  
TD 65536  
SOLVENT CDC13  
NS 16  
DS 0  
SWH 14705.883 Hz  
FIDRES 0.448788 Hz  
AQ 2.2282240 sec  
RG 101  
DW 34.000 usec  
DE 6.79 usec  
TE 300.2 K  
D1 1.00000000 sec  
TD0 1  
SFO1 500.1730885 MHz  
NUC1 1H  
P0 3.33 usec  
P1 10.00 usec  
PLW1 20.93000031 W

F2 - Processing parameters  
SI 65536  
SF 500.1700117 MHz  
WDW EM  
SSB 0  
LB 0.30 Hz  
GB 0  
PC 1.00

CH-O-5  
C13CPD CDC13 {D:\Spectra} nmr 26

BRUKER  
AVANCE NEO  
500 MHz NMR SPECTROMETER  
SAIF, PANJAB UNIVERSITY,  
CHANDIGARH

Current Data Parameters  
NAME Mar31-2022  
EXPNO 261  
PROCNO 1

F2 - Acquisition Parameters  
Date\_ 20220331  
Time\_ 18.29 h  
INSTRUM Avance Neo 500  
PROBHD Z119470\_0333 (  
PULPROG zgpg30  
TD 65536  
SOLVENT CDC13  
NS 1024  
DS 4  
SWH 37037.035 Hz  
FIDRES 1.130281 Hz  
AQ 0.8847360 sec  
RG 101  
DW 13.500 usec  
DE 6.50 usec  
TE 300.2 K  
D1 2.00000000 sec  
D11 0.03000000 sec  
TD0 1  
SFO1 125.7804233 MHz  
NUC1 13C  
P0 3.33 usec  
P1 10.00 usec  
PLW1 83.14099884 W  
SFO2 500.1720007 MHz  
NUC2 1H  
CPDPRG[2] waltz65  
PCPD2 80.00 usec  
PLW2 20.93000031 W  
PLW12 0.32703000 W  
PLW13 0.16449000 W

F2 - Processing parameters  
SI 32768  
SF 125.7678465 MHz  
WDW EM  
SSB 0  
LB 1.00 Hz  
GB 0  
PC 1.40

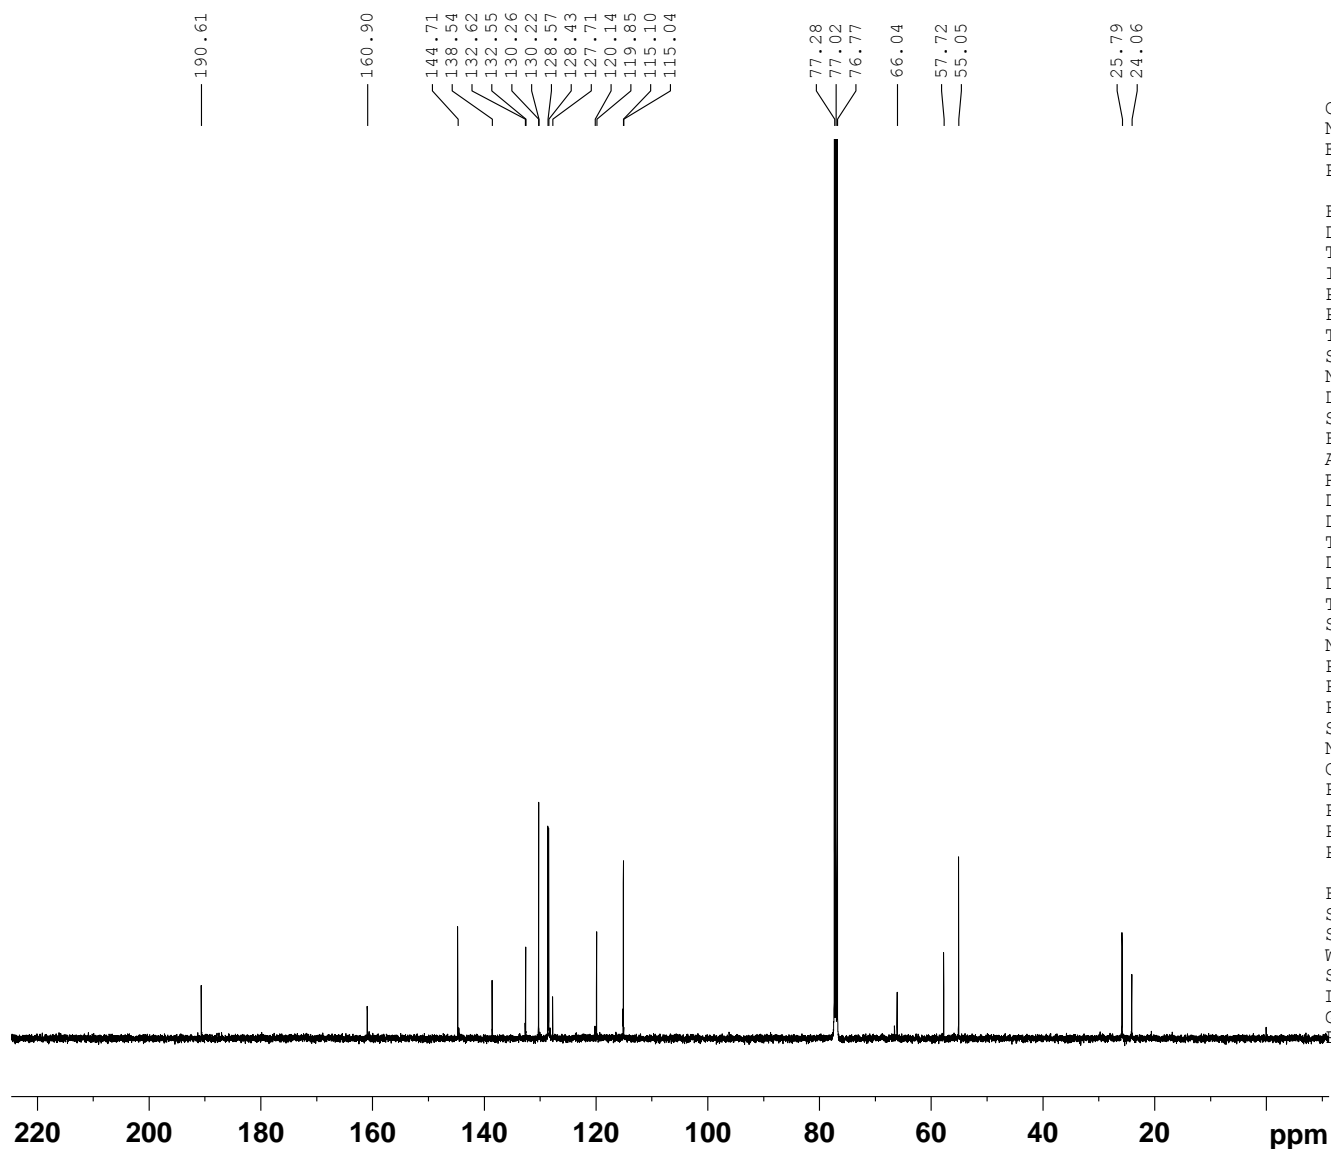

CH-O-5  
C13CPD CDC13 {D:\Spectra} nmr 26

BRUKER  
AVANCE NEO  
500 MHz NMR SPECTROMETER  
SAIF, PANJAB UNIVERSITY,  
CHANDIGARH

Current Data Parameters  
NAME Mar31-2022  
EXPNO 261  
PROCNO 1

F2 - Acquisition Parameters  
Date\_ 20220331  
Time\_ 18.29 h  
INSTRUM Avance Neo 500  
PROBHD Z119470\_0333 (   
PULPROG zgpg30  
TD 65536  
SOLVENT CDC13  
NS 1024  
DS 4  
SWH 37037.035 Hz  
FIDRES 1.130281 Hz  
AQ 0.8847360 sec  
RG 101  
DW 13.500 usec  
DE 6.50 usec  
TE 300.2 K  
D1 2.00000000 sec  
D11 0.03000000 sec  
TD0 1  
SFO1 125.7804233 MHz  
NUC1 13C  
P0 3.33 usec  
P1 10.00 usec  
PLW1 83.14099884 W  
SFO2 500.1720007 MHz  
NUC2 1H  
CPDPRG[2] waltz65  
PCPD2 80.00 usec  
PLW2 20.93000031 W  
PLW12 0.32703000 W  
PLW13 0.16449000 W

F2 - Processing parameters  
SI 32768  
SF 125.7678465 MHz  
WDW EM  
SSB 0  
LB 1.00 Hz  
GB 0  
PC 1.40

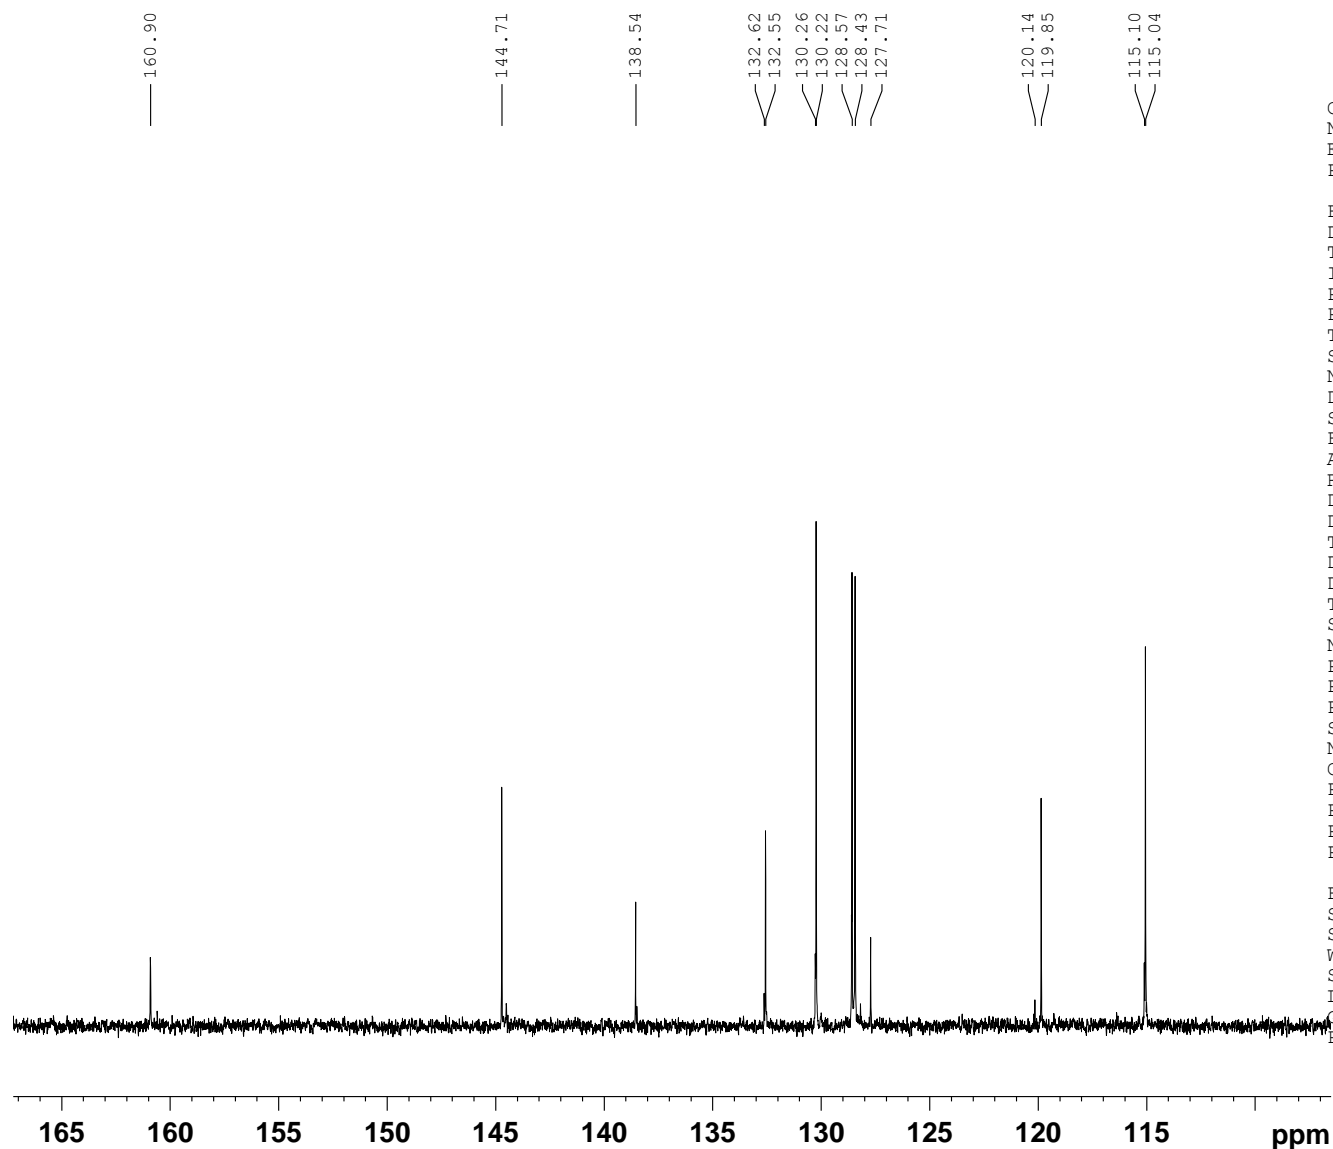





CH-O-6P  
1H\_8scan CDC13 (D:\Spectra) nmr 1

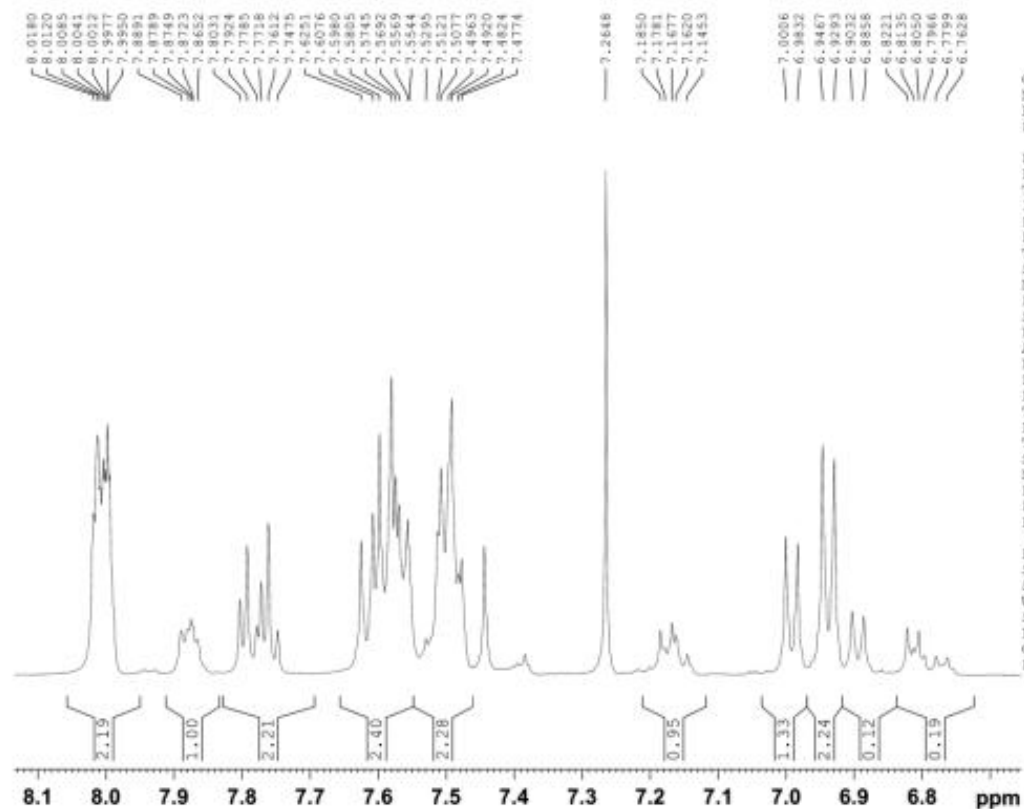

BRUKER  
AVANCE NEO  
500 MHz NMR  
SPECTROMETER  
SAIF, P.U.

Current Data Parameters  
NAME Jan25-2022-nmr  
EXPNO 11  
PROCNO 1

F2 - Acquisition Parameters  
Date\_ 20220127  
Time 7.03 h  
INSTRUM Avance Neo 500  
PROBHD Z119470\_0333 f  
PULPROG zg30  
TD 65536  
SOLVENT CDC13  
NS 16  
DS 0  
SMH 14705.883 Hz  
FIDRES 0.448788 Hz  
AQ 2.2282240 sec  
RG 95.7854  
DW 34.000 usec  
DE 6.79 usec  
TE 300.2 K  
D1 1.00000000 sec  
TD0 1  
SFO1 500.1730885 MHz  
NUC1 1H  
PC 3.33 usec  
P1 10.00 usec  
PLW1 20.93000031 W

F2 - Processing parameters  
SI 65536  
SF 500.1700097 MHz  
WDW EM  
SSB 0  
LB 0.30 Hz  
GB 0  
PC 1.00

CH-O-6P  
1H\_8scan CDC13 {D:\Spectra} nmr 1

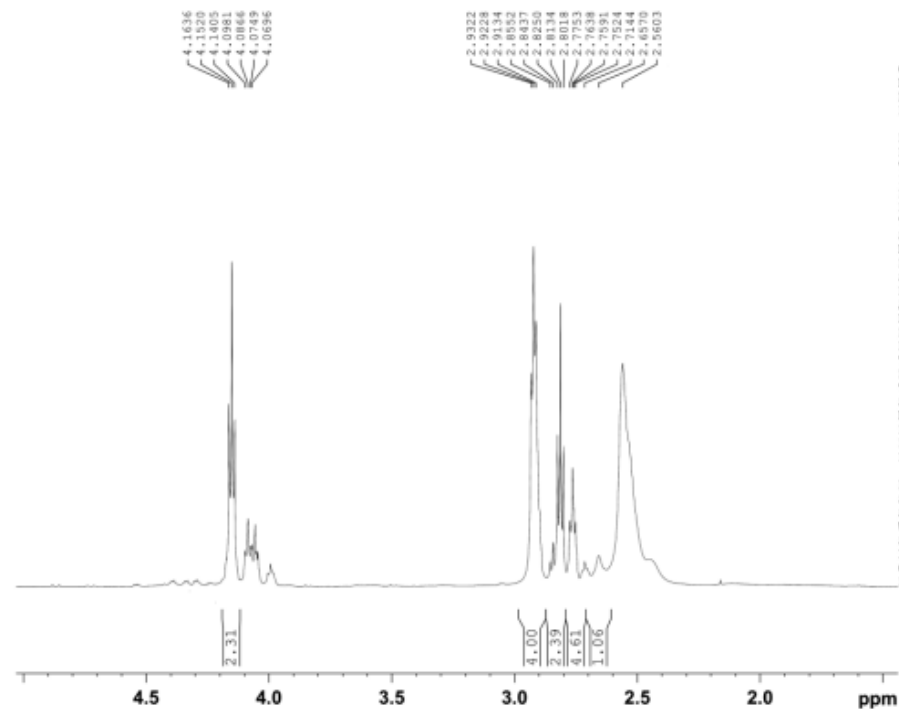

BRUKER  
AVANCE NEO  
500 MHz NMR  
SPECTROMETER  
SAIF, P.U.

Current Data Parameters  
NAME Jan25-2022-nmr  
EXPNO 11  
PROCNO 1

F2 - Acquisition Parameters  
Date\_ 20220127  
Time 7.03 h  
INSTRUM Avance Neo 500  
PROBHD Z119470\_0333 (4  
PULPROG zg30  
TD 65536  
SOLVENT CDC13  
NS 16  
DS 0  
SWH 14705.883 Hz  
FIDRES 0.448788 Hz  
AQ 2.2282240 sec  
RG 95.7854  
DW 34.000 usec  
DE 6.79 usec  
TE 300.2 K  
D1 1.00000000 sec  
TD0 1  
SFO1 500.1730885 MHz  
NUC1 1H  
P0 3.33 usec  
P1 10.00 usec  
PLW1 20.93000031 W

F2 - Processing parameters  
SI 65536  
SF 500.1700097 MHz  
WDW EM  
SSB 0  
LB 0.30 Hz  
GB 0  
PC 1.00

CH-O-6P  
C13CPD CDC13 {D:\Spectra} nmr 1

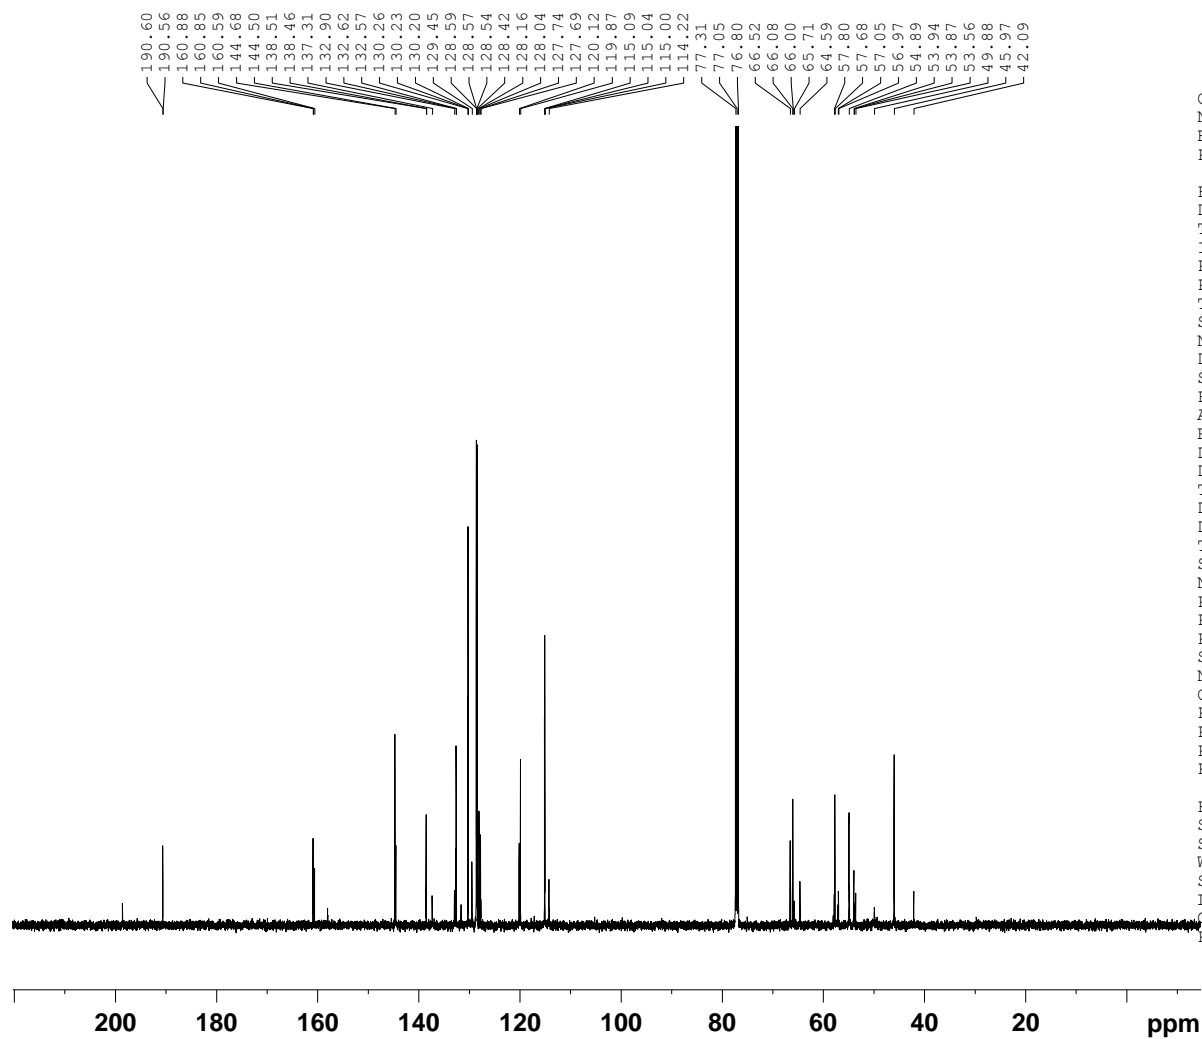

BRUKER  
AVANCE NEO  
500 MHz NMR SPECTROMETER  
SAIF, PANJAB UNIVERSITY,  
CHANDIGARH

Current Data Parameters  
NAME Jan25-2022-nmr  
EXPNO 12  
PROCNO 1

F2 - Acquisition Parameters  
Date\_ 20220127  
Time\_ 7.29 h  
INSTRUM Avance Neo 500  
PROBHD Z119470\_0333 (   
PULPROG zgpg30  
TD 65536  
SOLVENT CDC13  
NS 512  
DS 4  
SWH 37037.035 Hz  
FIDRES 1.130281 Hz  
AQ 0.8847360 sec  
RG 101  
DW 13.500 usec  
DE 6.50 usec  
TE 300.1 K  
D1 2.0000000 sec  
D11 0.0300000 sec  
TD0 1  
SFO1 125.7804233 MHz  
NUC1 13C  
P0 3.33 usec  
P1 10.00 usec  
PLW1 83.14099884 W  
SFO2 500.1720007 MHz  
NUC2 1H  
CPDPRG[2] waltz65  
PCPD2 80.00 usec  
PLW2 20.93000031 W  
PLW12 0.32703000 W  
PLW13 0.16449000 W

F2 - Processing parameters  
SI 32768  
SF 125.7678465 MHz  
WDW EM  
SSB 0  
LB 1.00 Hz  
GB 0  
PC 1.40

CH-O-6P  
C13CPD CDC13 {D:\Spectra} nmr 1

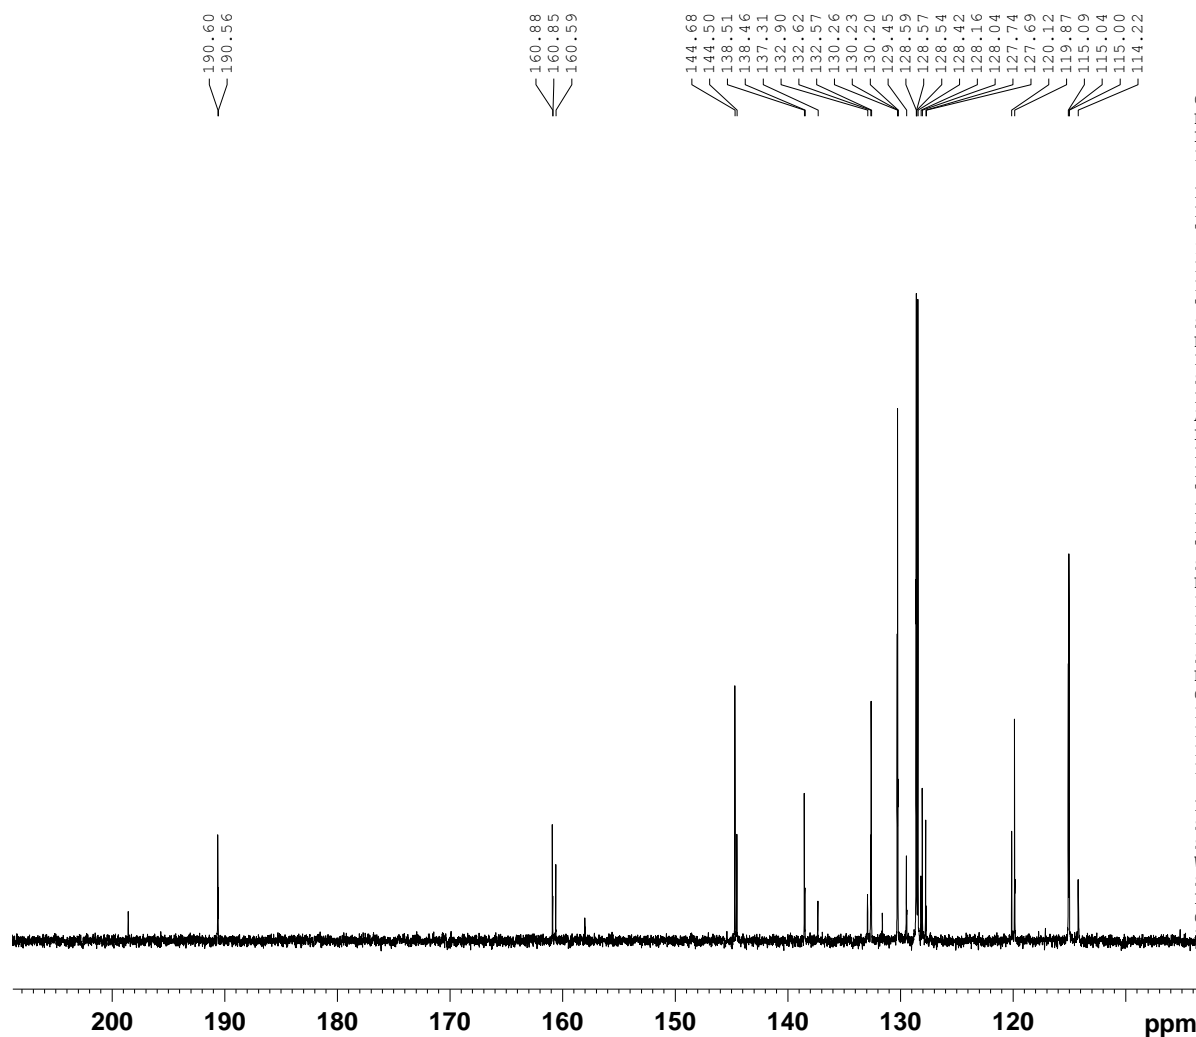

BRUKER  
AVANCE NEO  
500 MHz NMR SPECTROMETER  
SAIF, PANJAB UNIVERSITY,  
CHANDIGARH

Current Data Parameters  
NAME Jan25-2022-nmr  
EXPNO 12  
PROCNO 1

F2 - Acquisition Parameters  
Date\_ 20220127  
Time 7.29 h  
INSTRUM Avance Neo 500  
PROBHD Z119470\_0333 (  
PULPROG zgpg30  
TD 65536  
SOLVENT CDC13  
NS 512  
DS 4  
SWH 37037.035 Hz  
FIDRES 1.130281 Hz  
AQ 0.8847360 sec  
RG 101  
DW 13.500 usec  
DE 6.50 usec  
TE 300.1 K  
D1 2.00000000 sec  
D11 0.03000000 sec  
TD0 1  
SFO1 125.7804233 MHz  
NUC1 13C  
P0 3.33 usec  
P1 10.00 usec  
PLW1 83.14099884 W  
SFO2 500.1720007 MHz  
NUC2 1H  
CPDPRG[2] waltz65  
PCPD2 80.00 usec  
PLW2 20.93000031 W  
PLW12 0.32703000 W  
PLW13 0.16449000 W

F2 - Processing parameters  
SI 32768  
SF 125.7678465 MHz  
WDW EM  
SSB 0  
LB 1.00 Hz  
GB 0  
PC 1.40

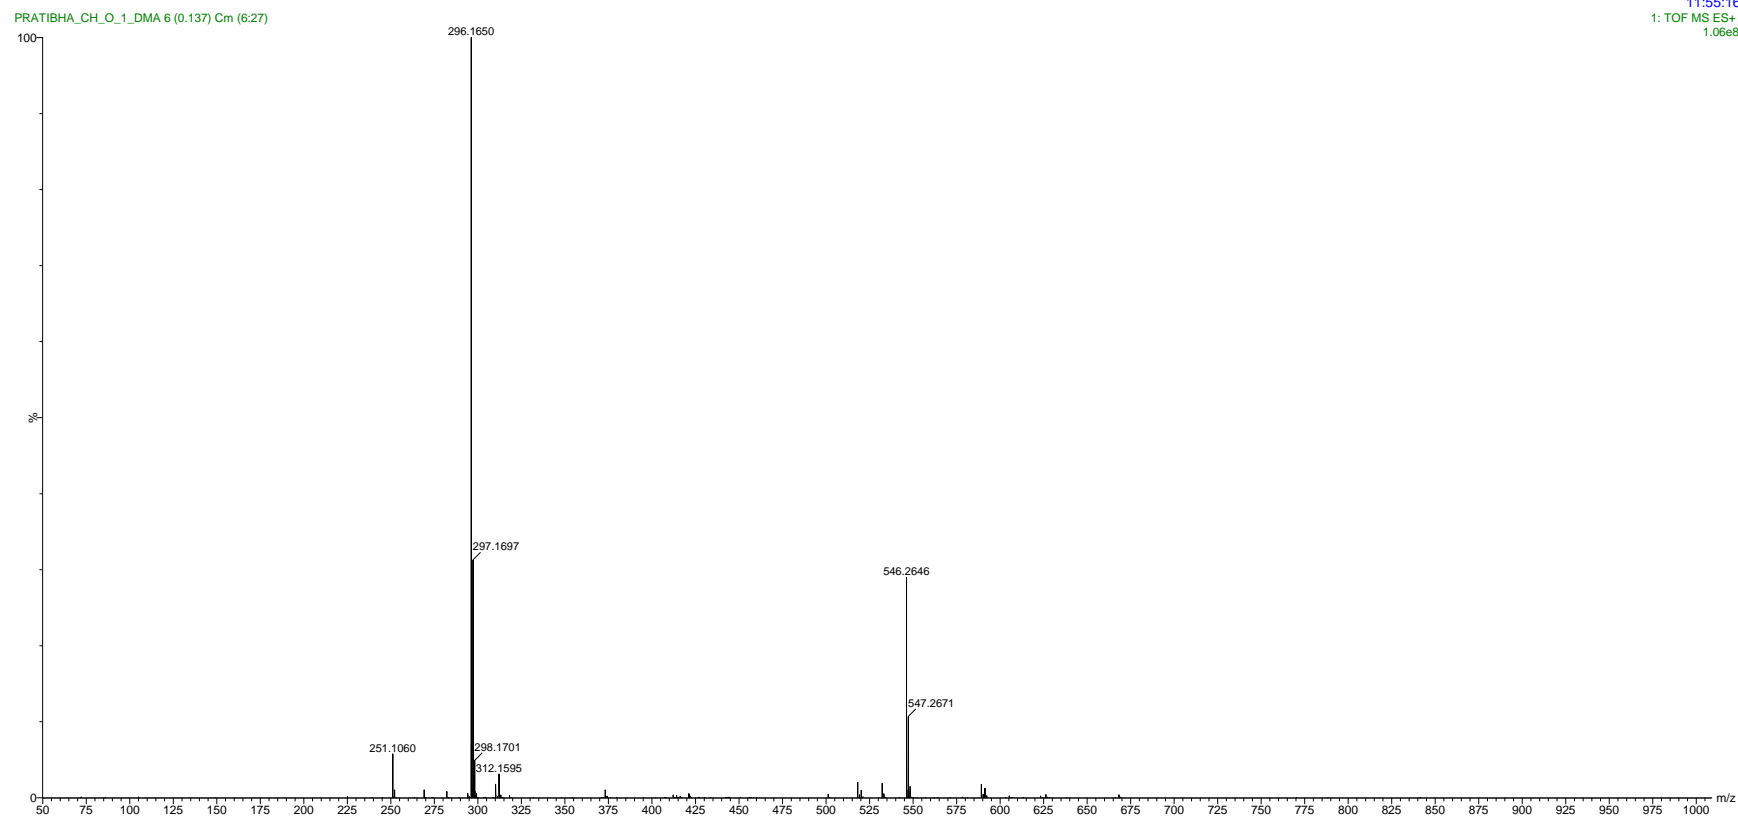

SAIF,PANJAB UNIVERSITY,CHANDIGARH

SYNAPT-XS#DBA064

22-Sep-2022  
11:55:16  
1: TOF MS ES+  
1.06e8

PRATIBHA\_CH\_O\_1\_DMA 6 (0.137) Cm (6.27)

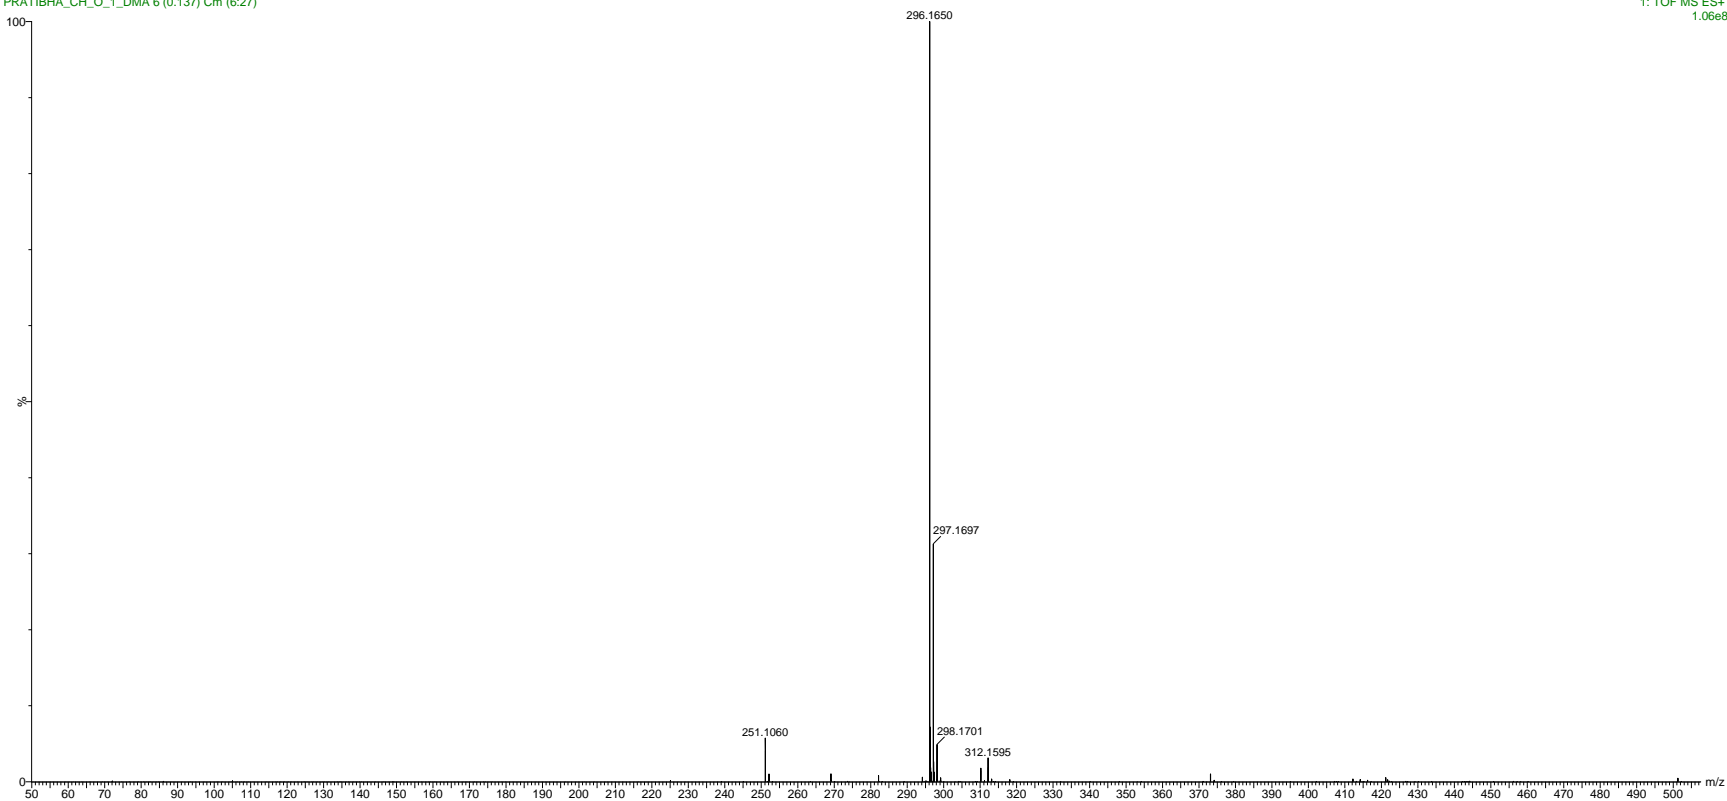

PS7

CH-O-8  
1H\_8scan CDC13 {D:\Spectra} nmr 27

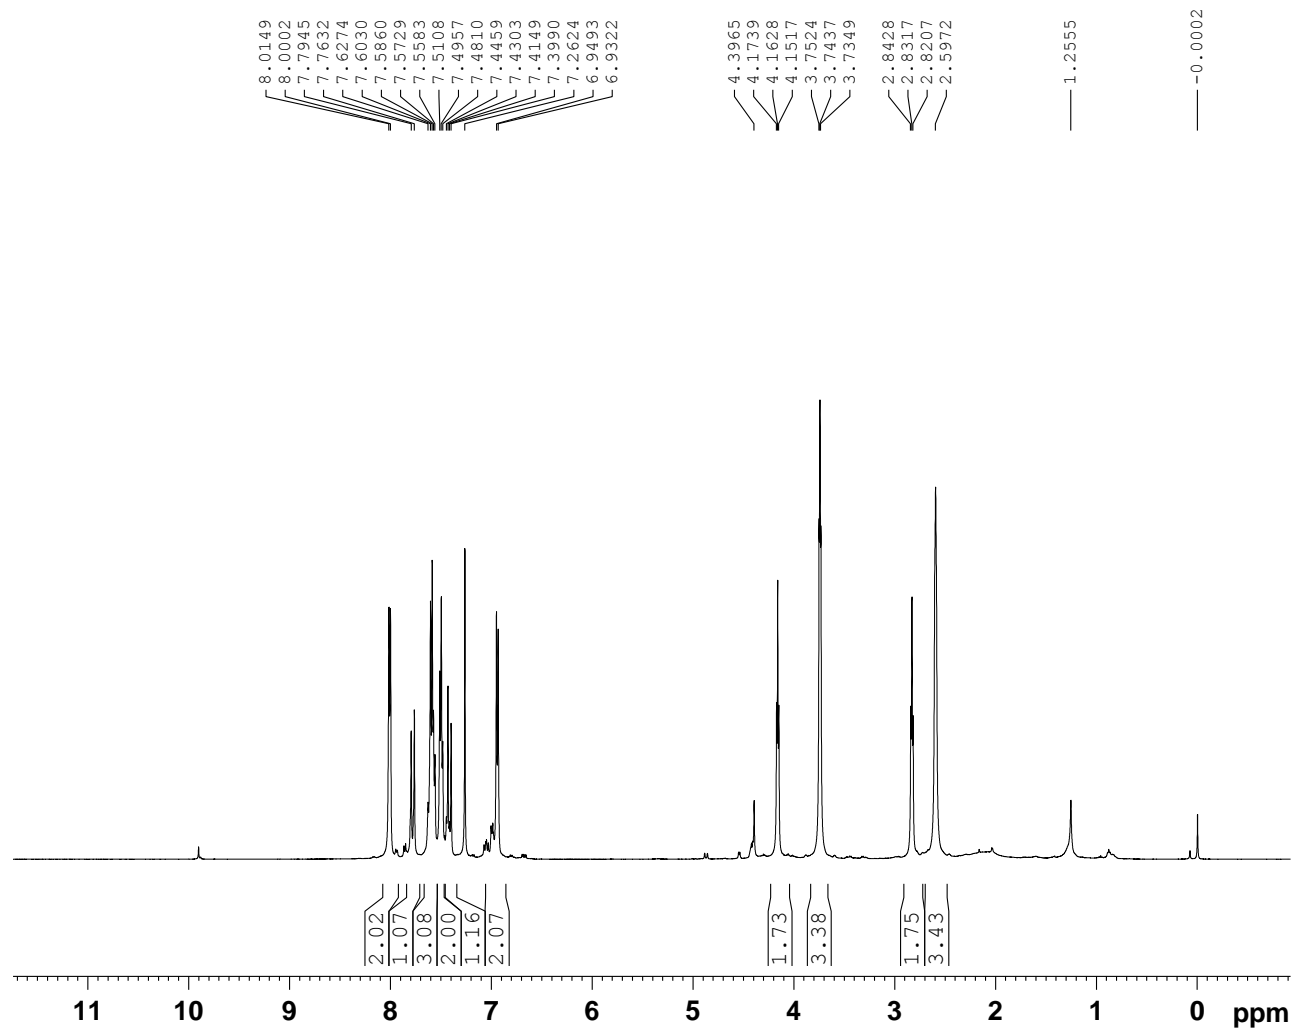

BRUKER  
AVANCE NEO  
500 MHz NMR  
SPECTROMETER  
SAIF, P.U.

Current Data Parameters  
NAME Mar31-2022  
EXPNO 270  
PROCNO 1

F2 - Acquisition Parameters  
Date\_ 20220331  
Time\_ 18.31 h  
INSTRUM Avance Neo 500  
PROBHD Z119470\_0333 (zg30)  
PULPROG zg30  
TD 65536  
SOLVENT CDC13  
NS 16  
DS 0  
SWH 14705.883 Hz  
FIDRES 0.448788 Hz  
AQ 2.2282240 sec  
RG 95.7854  
DW 34.000 usec  
DE 6.79 usec  
TE 300.2 K  
D1 1.00000000 sec  
TD0 1  
SFO1 500.1730885 MHz  
NUC1 1H  
P0 3.33 usec  
P1 10.00 usec  
PLW1 20.93000031 W

F2 - Processing parameters  
SI 65536  
SF 500.1700109 MHz  
WDW EM  
SSB 0  
LB 0.30 Hz  
GB 0  
PC 1.00



CH-O-8  
1H\_8scan CDC13 {D:\Spectra} nmr 27

BRUKER  
AVANCE NEO  
500 MHz NMR  
SPECTROMETER  
SAIF, P.U.

Current Data Parameters  
NAME Mar31-2022  
EXPNO 270  
PROCNO 1

F2 - Acquisition Parameters  
Date\_ 20220331  
Time\_ 18.31 h  
INSTRUM Avance Neo 500  
PROBHD Z119470\_0333 (   
PULPROG zg30  
TD 65536  
SOLVENT CDC13  
NS 16  
DS 0  
SWH 14705.883 Hz  
FIDRES 0.448788 Hz  
AQ 2.2282240 sec  
RG 95.7854  
DW 34.000 usec  
DE 6.79 usec  
TE 300.2 K  
D1 1.00000000 sec  
TD0 1  
SFO1 500.1730885 MHz  
NUC1 1H  
P0 3.33 usec  
P1 10.00 usec  
PLW1 20.93000031 W

F2 - Processing parameters  
SI 65536  
SF 500.1700109 MHz  
WDW EM  
SSB 0  
LB 0.30 Hz  
GB 0  
PC 1.00

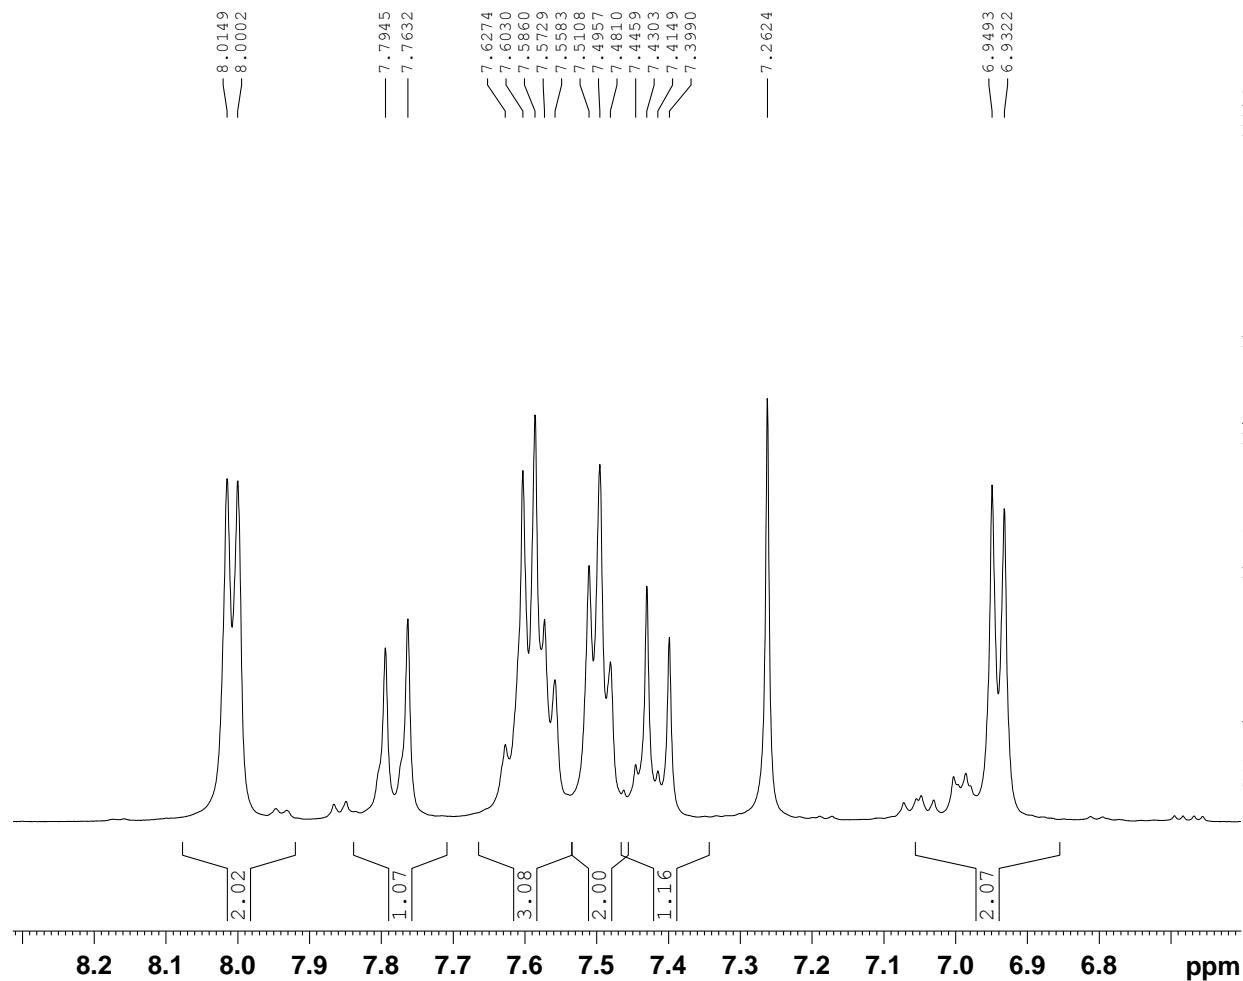

CH-O-8  
1H\_8scan CDCl3 {D:\Spectra} nmr 27

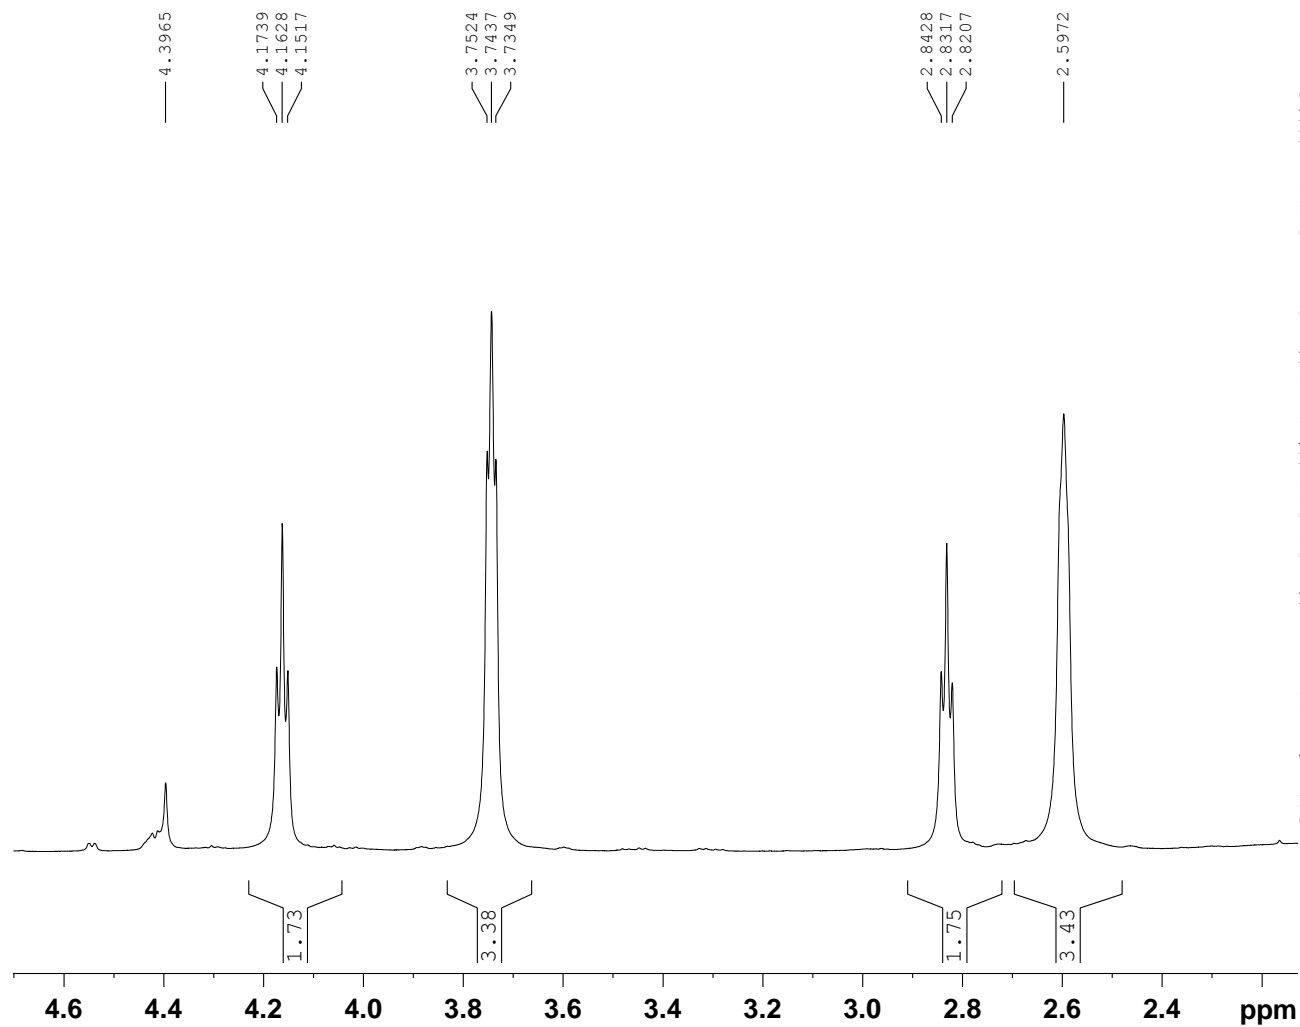

BRUKER  
AVANCE NEO  
500 MHz NMR  
SPECTROMETER  
SAIF, P.U.

Current Data Parameters  
NAME Mar31-2022  
EXPNO 270  
PROCNO 1

F2 - Acquisition Parameters  
Date\_ 20220331  
Time\_ 18.31 h  
INSTRUM Avance Neo 500  
PROBHD Z119470\_0333 (zg30)  
PULPROG  
TD 65536  
SOLVENT CDCl3  
NS 16  
DS 0  
SWH 14705.883 Hz  
FIDRES 0.448788 Hz  
AQ 2.2282240 sec  
RG 95.7854  
DW 34.000 usec  
DE 6.79 usec  
TE 300.2 K  
D1 1.00000000 sec  
TD0 1  
SFO1 500.1730885 MHz  
NUC1 1H  
P0 3.33 usec  
P1 10.00 usec  
PLW1 20.93000031 W

F2 - Processing parameters  
SI 65536  
SF 500.1700109 MHz  
WDW EM  
SSB 0  
LB 0.30 Hz  
GB 0  
PC 1.00

PRATIBHA\_PS 25 (0.120) Cm (4-9)

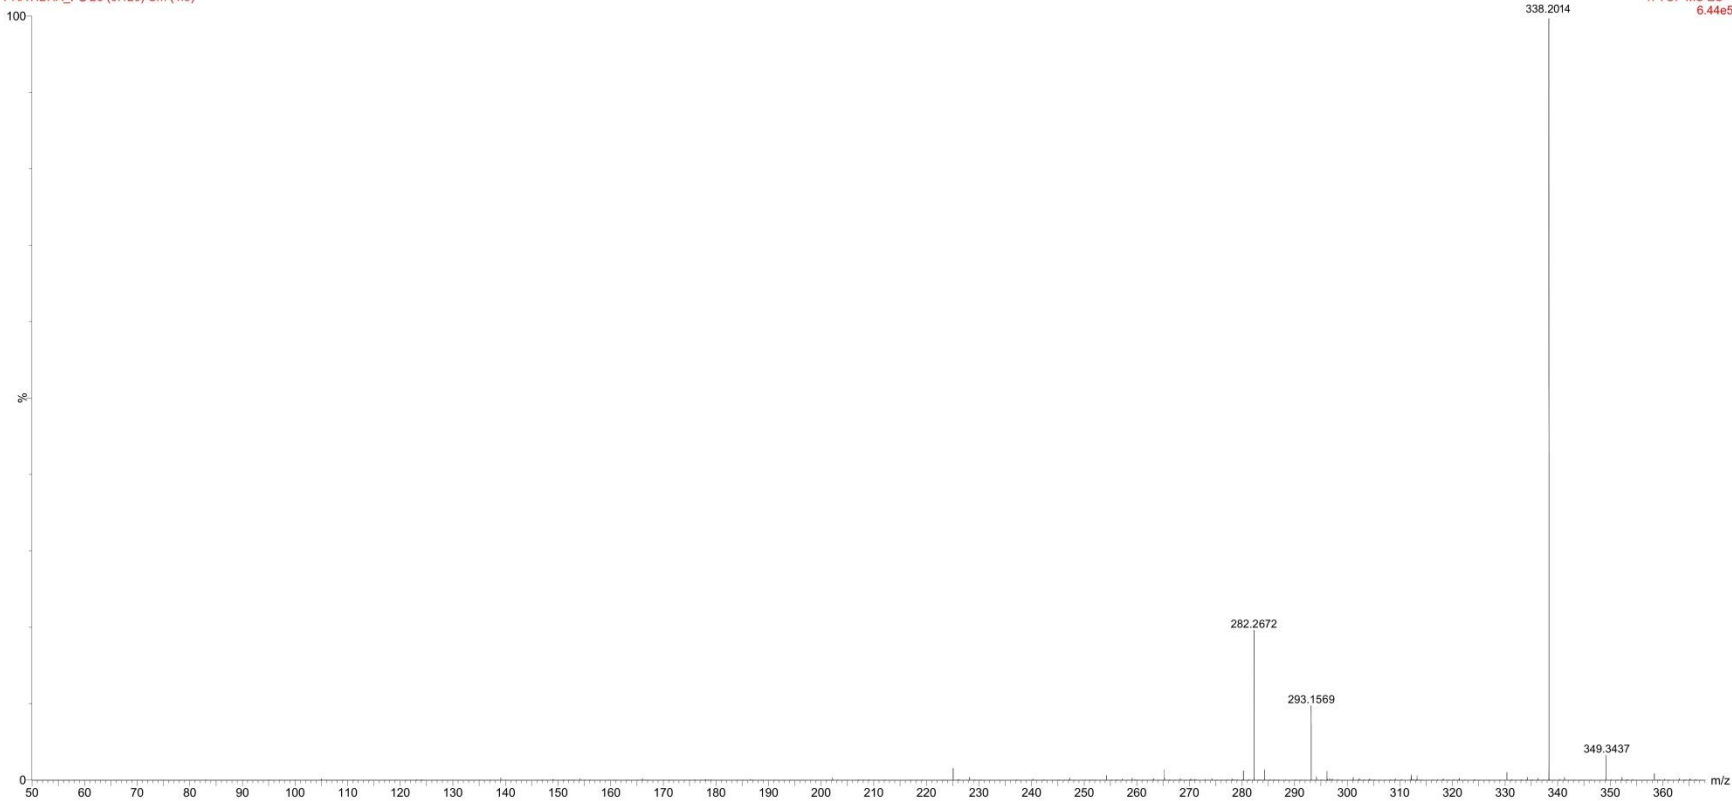

PS8

CH-O-9PY

1H\_8scan CDC13 {D:\Spectra} nmr 3

BRUKER  
AVANCE NEO  
500 MHz NMR  
SPECTROMETER  
SAIF, P.U.

Current Data Parameters  
NAME Jan25-2022-nmr  
EXPNO 31  
PROCNO 1

F2 - Acquisition Parameters  
Date\_ 20220127  
Time 8.01 h  
INSTRUM Avance Neo 500  
PROBHD Z119470\_0333 (   
PULPROG zg30  
TD 65536  
SOLVENT CDC13  
NS 16  
DS 0  
SWH 14705.883 Hz  
FIDRES 0.448788 Hz  
AQ 2.2282240 sec  
RG 44.47  
DW 34.000 usec  
DE 6.79 usec  
TE 300.2 K  
D1 1.00000000 sec  
TD0 1  
SFO1 500.1730885 MHz  
NUC1 1H  
P0 3.33 usec  
P1 10.00 usec  
PLW1 20.93000031 W

F2 - Processing parameters  
SI 65536  
SF 500.1700125 MHz  
WDW EM  
SSB 0  
LB 0.30 Hz  
GB 0  
PC 1.00

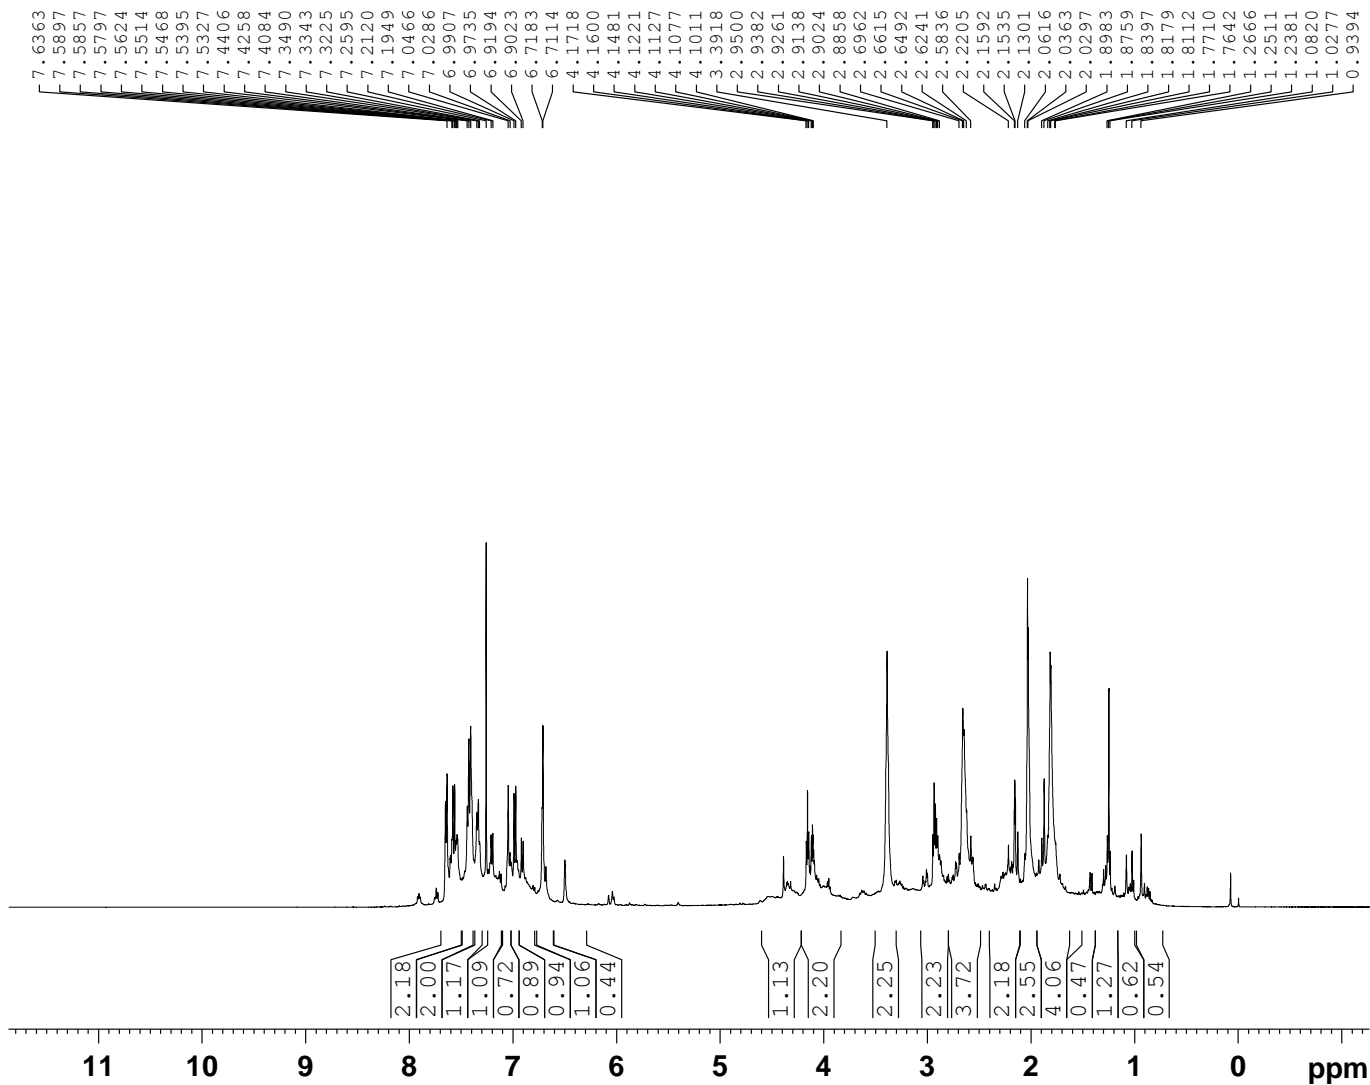

CH-O-9PY  
C13CPD CDC13 {D:\Spectra} nmr 3

BRUKER  
AVANCE NEO  
500 MHz NMR SPECTROMETER  
SAIF, PANJAB UNIVERSITY,  
CHANDIGARH

Current Data Parameters  
NAME Jan25-2022-nmr  
EXPNO 32  
PROCNO 1

F2 - Acquisition Parameters  
Date\_ 20220127  
Time\_ 8.26 h  
INSTRUM Avance Neo 500  
PROBHD Z119470\_0333 (  
PULPROG zgpg30  
TD 65536  
SOLVENT CDC13  
NS 512  
DS 4  
SWH 37037.035 Hz  
FIDRES 1.130281 Hz  
AQ 0.8847360 sec  
RG 101  
DW 13.500 usec  
DE 6.50 usec  
TE 300.2 K  
D1 2.00000000 sec  
D11 0.03000000 sec  
TD0 1  
SFO1 125.7804233 MHz  
NUC1 13C  
P0 3.33 usec  
P1 10.00 usec  
PLW1 83.14099884 W  
SFO2 500.1720007 MHz  
NUC2 1H  
CPDPRG[2] waltz65  
PCPD2 80.00 usec  
PLW2 20.93000031 W  
PLW12 0.32703000 W  
PLW13 0.16449000 W

F2 - Processing parameters  
SI 32768  
SF 125.7678465 MHz  
WDW EM  
SSB 0  
LB 1.00 Hz  
GB 0  
PC 1.40

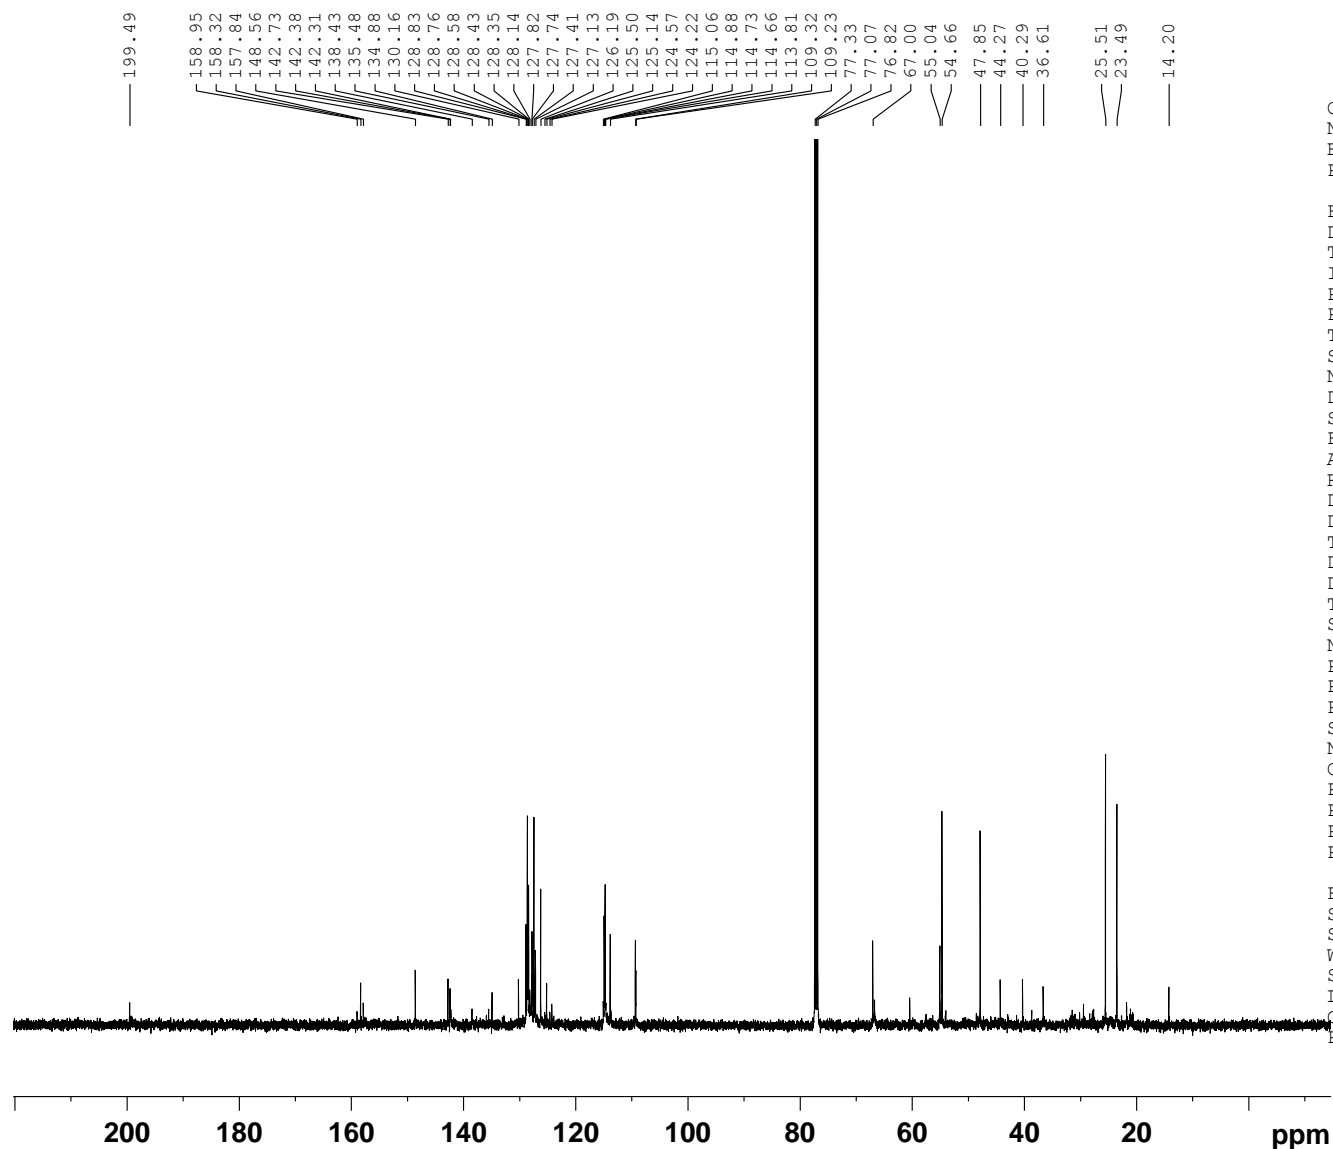

CH-O-9PY  
C13CPD CDC13 {D:\Spectra} nmr 3

BRUKER  
AVANCE NEO  
500 MHz NMR SPECTROMETER  
SAIF, PANJAB UNIVERSITY,  
CHANDIGARH

Current Data Parameters  
NAME Jan25-2022-nmr  
EXPNO 32  
PROCNO 1

F2 - Acquisition Parameters  
Date\_ 20220127  
Time\_ 8.26 h  
INSTRUM Avance Neo 500  
PROBHD Z119470\_0333 (   
PULPROG zgpg30  
TD 65536  
SOLVENT CDC13  
NS 512  
DS 4  
SWH 37037.035 Hz  
FIDRES 1.130281 Hz  
AQ 0.8847360 sec  
RG 101  
DW 13.500 usec  
DE 6.50 usec  
TE 300.2 K  
D1 2.00000000 sec  
D11 0.03000000 sec  
TD0 1  
SFO1 125.7804233 MHz  
NUC1 13C  
P0 3.33 usec  
P1 10.00 usec  
PLW1 83.14099884 W  
SFO2 500.1720007 MHz  
NUC2 1H  
CPDPRG[2] waltz65  
PCPD2 80.00 usec  
PLW2 20.93000031 W  
PLW12 0.32703000 W  
PLW13 0.16449000 W

F2 - Processing parameters  
SI 32768  
SF 125.7678465 MHz  
WDW EM  
SSB 0  
LB 1.00 Hz  
GB 0  
PC 1.40

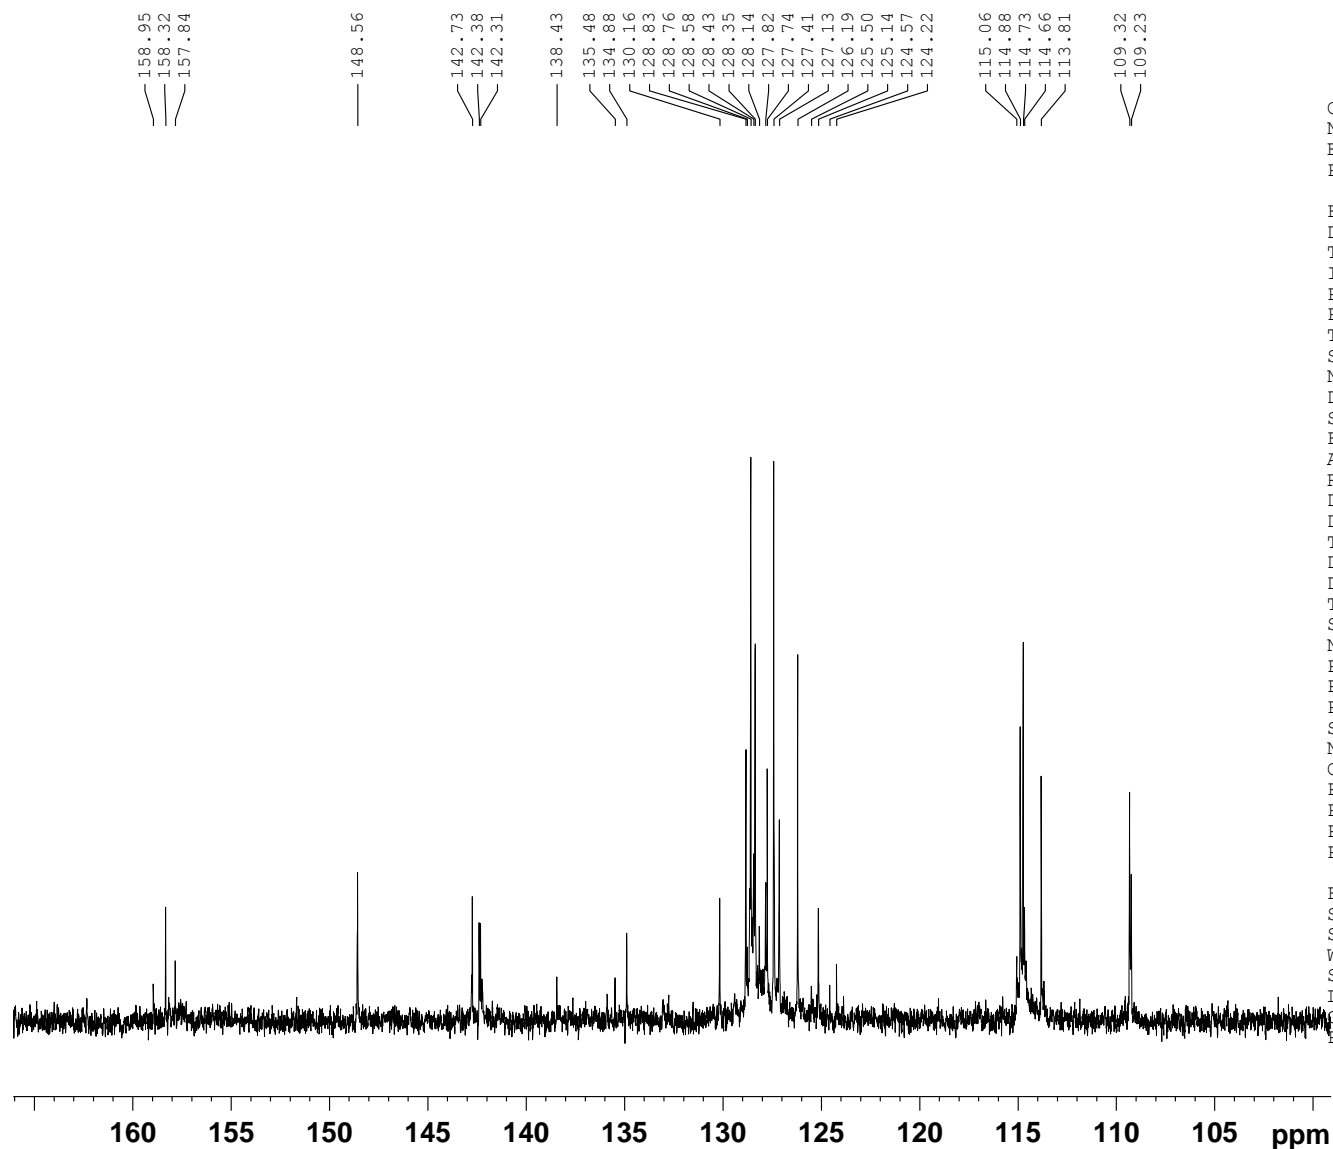

SAIF, PANJAB UNIVERSITY, CHANDIGARH

SYNAPT-XS#DBA064

22-Sep-2022

12:58:14

1: TOF MS ES+

3.19e7

PR\_PS\_2 5 (0.120) Cm (4:9)

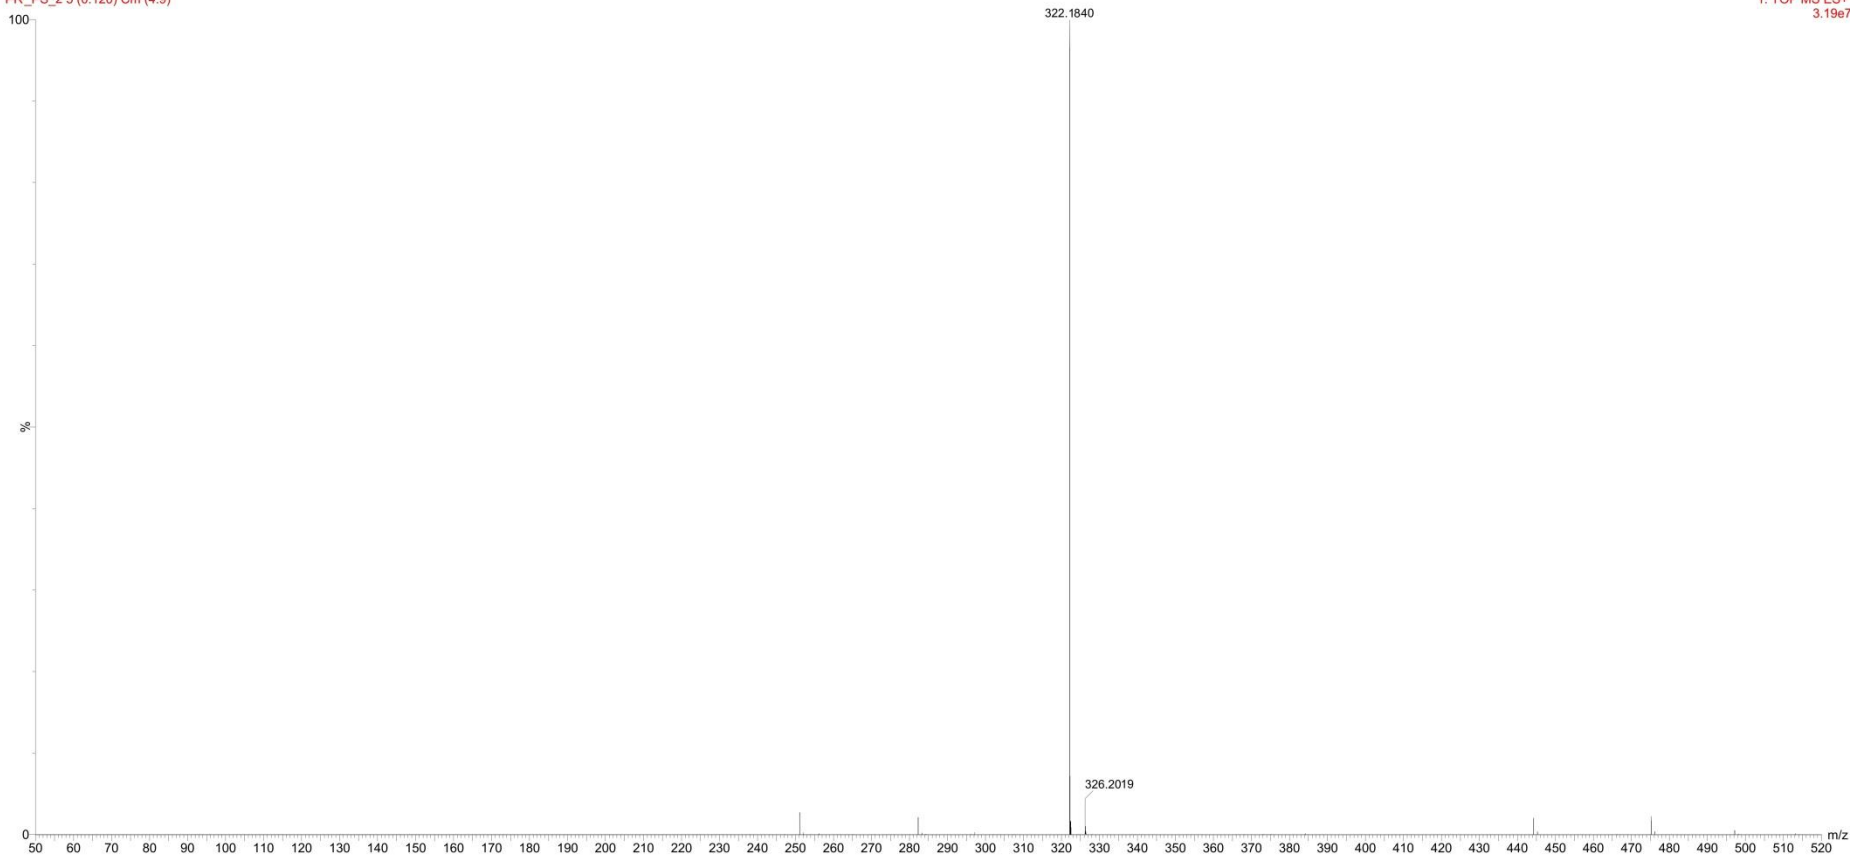

PS9

CH-O-10  
1H\_8scan CDC13 {D:\Spectra} nmr 28

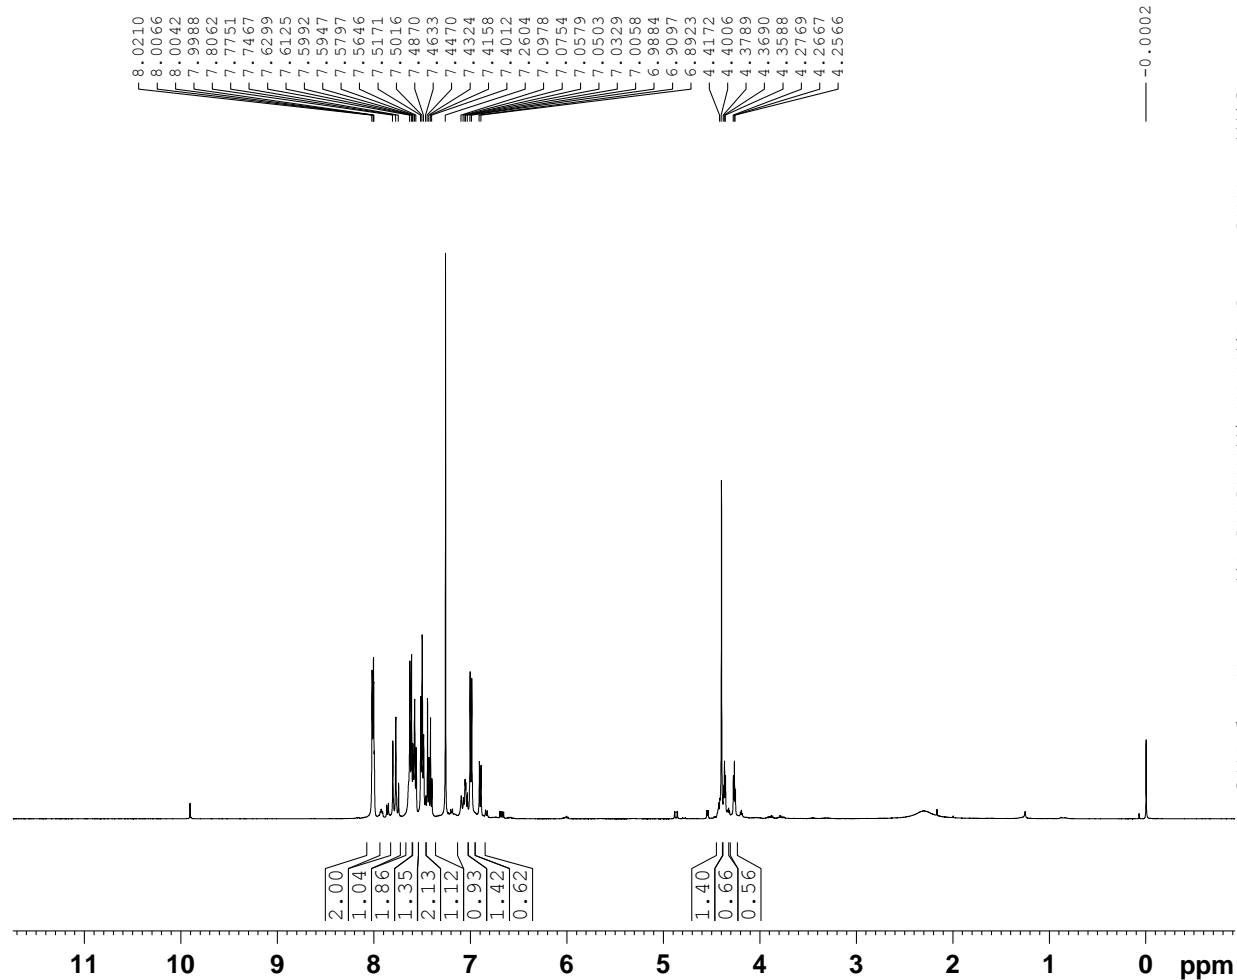

BRUKER  
AVANCE NEO  
500 MHz NMR  
SPECTROMETER  
SAIF, P.U.

Current Data Parameters  
NAME Mar31-2022  
EXPNO 280  
PROCNO 1

F2 - Acquisition Parameters  
Date\_ 20220331  
Time 19.25 h  
INSTRUM Avance Neo 500  
PROBHD Z119470\_0333 (  
PULPROG zg30  
TD 65536  
SOLVENT CDC13  
NS 16  
DS 0  
SWH 14705.883 Hz  
FIDRES 0.448788 Hz  
AQ 2.2282240 sec  
RG 101  
DW 34.000 usec  
DE 6.79 usec  
TE 300.2 K  
D1 1.00000000 sec  
TD0 1  
SFO1 500.1730885 MHz  
NUC1 1H  
P0 3.33 usec  
P1 10.00 usec  
PLW1 20.93000031 W

F2 - Processing parameters  
SI 65536  
SF 500.1700119 MHz  
WDW EM  
SSB 0  
LB 0.30 Hz  
GB 0  
PC 1.00



CH-O-10  
C13CPD CDC13 {D:\Spectra} nmr 28

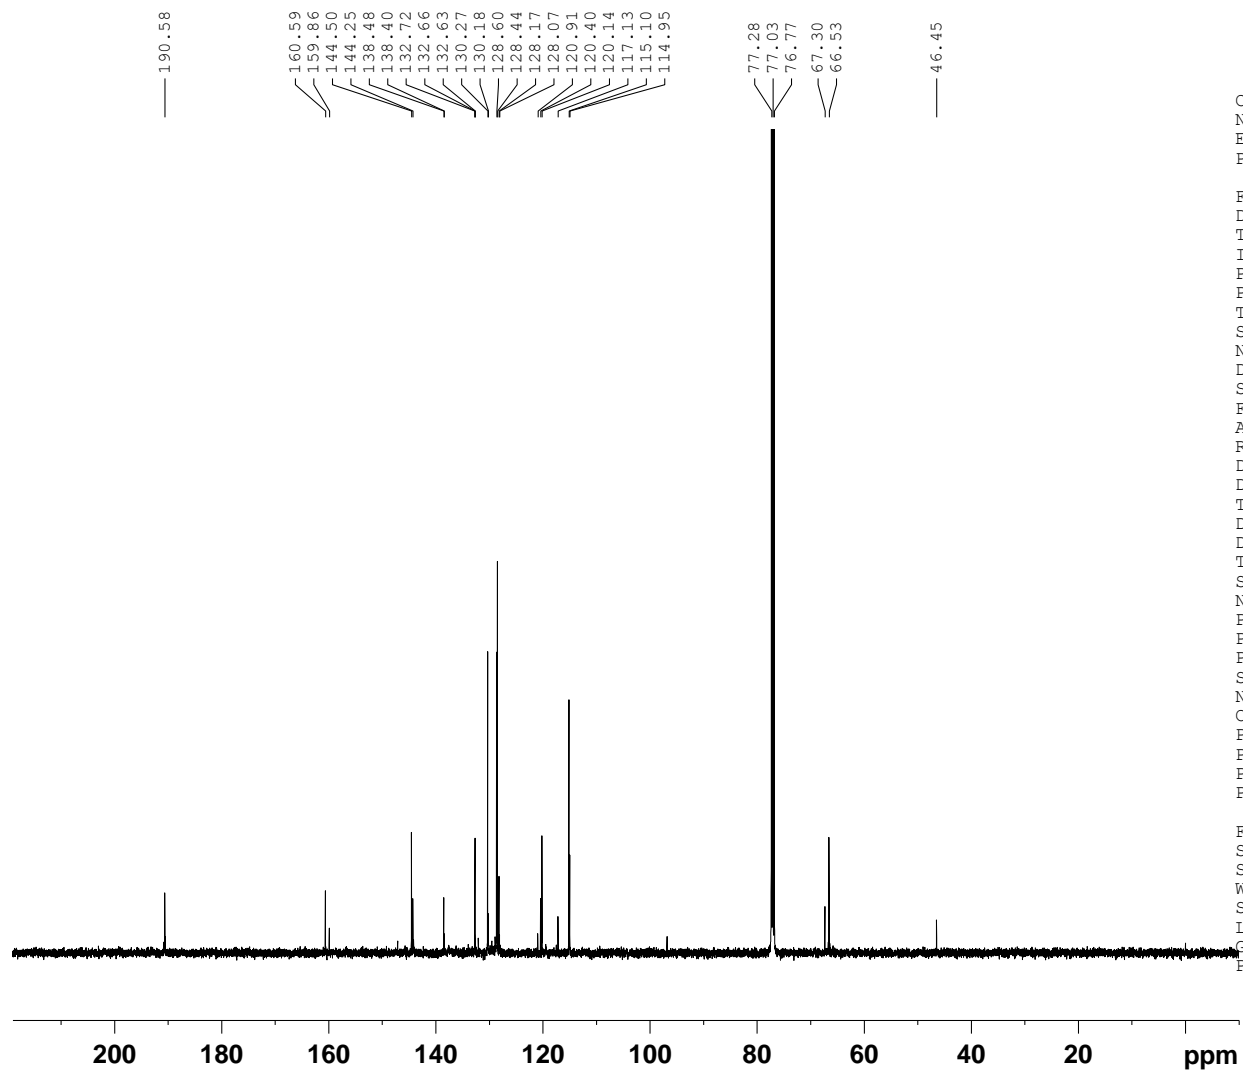

BRUKER  
AVANCE NEO  
500 MHz NMR SPECTROMETER  
SAIF, PANJAB UNIVERSITY,  
CHANDIGARH

Current Data Parameters  
NAME Mar31-2022  
EXPNO 281  
PROCNO 1

F2 - Acquisition Parameters  
Date\_ 20220331  
Time\_ 20.15 h  
INSTRUM Avance Neo 500  
PROBHD Z119470\_0333 (  
PULPROG zgpg30  
TD 65536  
SOLVENT CDCl3  
NS 1024  
DS 4  
SWH 37037.035 Hz  
FIDRES 1.130281 Hz  
AQ 0.8847360 sec  
RG 101  
DW 13.500 usec  
DE 6.50 usec  
TE 300.2 K  
D1 2.00000000 sec  
D11 0.03000000 sec  
TD0 1  
SFO1 125.7804233 MHz  
NUC1 13C  
P0 3.33 usec  
P1 10.00 usec  
PLW1 83.14099884 W  
SFO2 500.1720007 MHz  
NUC2 1H  
CPDPRG[2] waltz65  
PCPD2 80.00 usec  
PLW2 20.93000031 W  
PLW12 0.32703000 W  
PLW13 0.16449000 W

F2 - Processing parameters  
SI 32768  
SF 125.7678465 MHz  
WDW EM  
SSB 0  
LB 1.00 Hz  
GB 0  
PC 1.40

CH-O-10  
C13CPD CDC13 {D:\Spectra} nmr 28

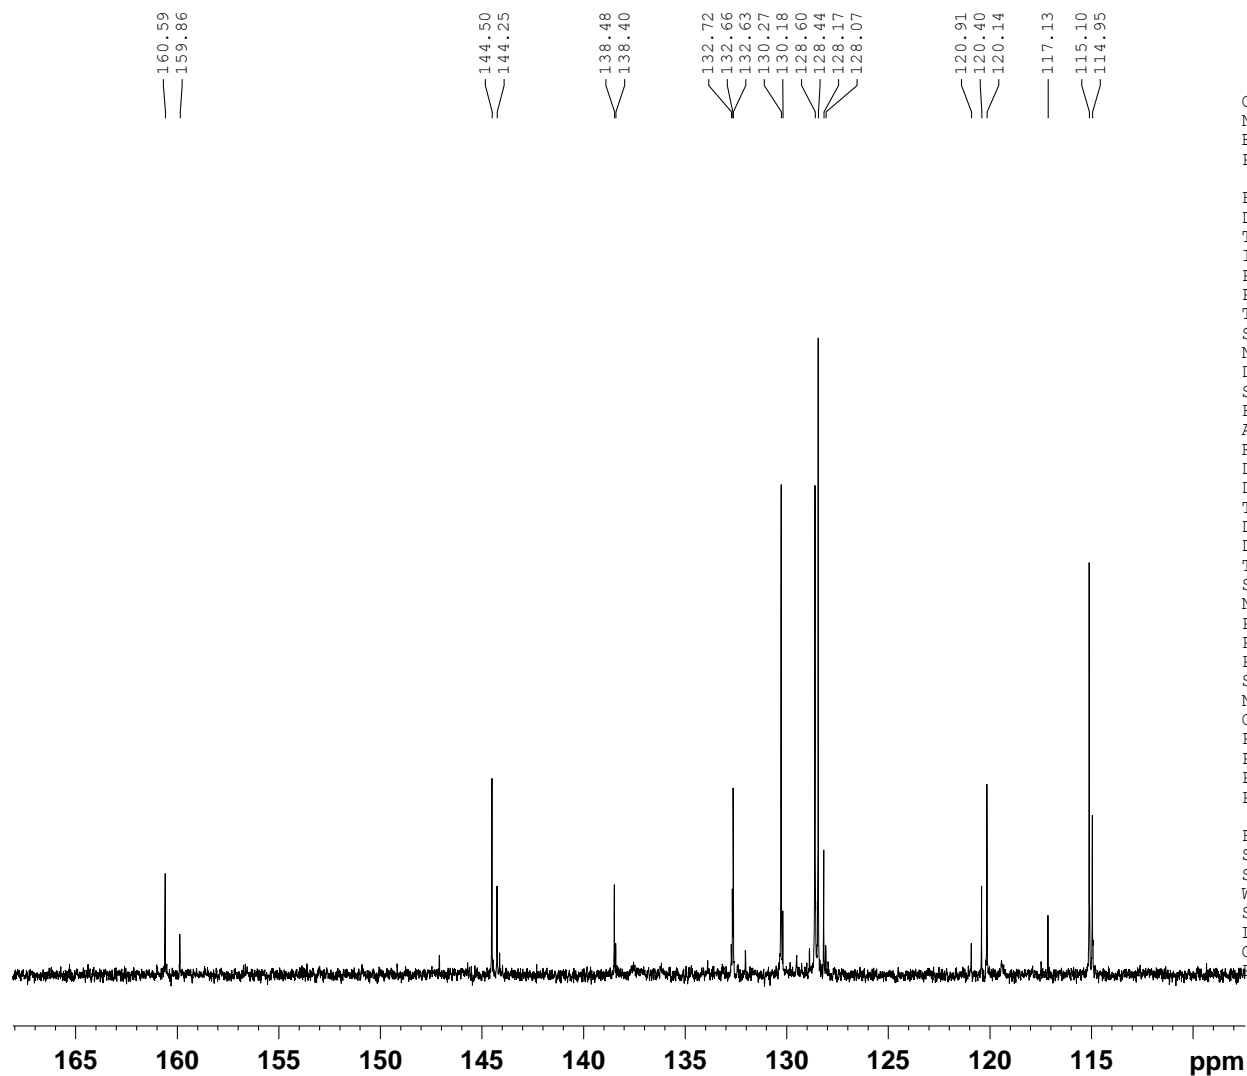

BRUKER  
AVANCE NEO  
500 MHz NMR SPECTROMETER  
SAIF, PANJAB UNIVERSITY,  
CHANDIGARH

Current Data Parameters  
NAME Mar31-2022  
EXPNO 281  
PROCNO 1

F2 - Acquisition Parameters  
Date\_ 20220331  
Time\_ 20.15 h  
INSTRUM Avance Neo 500  
PROBHD Z119470\_0333 (   
PULPROG zgpg30  
TD 65536  
SOLVENT CDC13  
NS 1024  
DS 4  
SWH 37037.035 Hz  
FIDRES 1.130281 Hz  
AQ 0.8847360 sec  
RG 101  
DW 13.500 usec  
DE 6.50 usec  
TE 300.2 K  
D1 2.00000000 sec  
D11 0.03000000 sec  
TD0 1  
SFO1 125.7804233 MHz  
NUC1 13C  
P0 3.33 usec  
P1 10.00 usec  
PLW1 83.14099884 W  
SFO2 500.1720007 MHz  
NUC2 1H  
CPDPRG[2] waltz65  
PCPD2 80.00 usec  
PLW2 20.93000031 W  
PLW12 0.32703000 W  
PLW13 0.16449000 W

F2 - Processing parameters  
SI 32768  
SF 125.7678465 MHz  
WDW EM  
SSB 0  
LB 1.00 Hz  
GB 0  
PC 1.40

PS10

CH-O7MP

1H\_8scan CDC13 {D:\Spectra} nmr 2

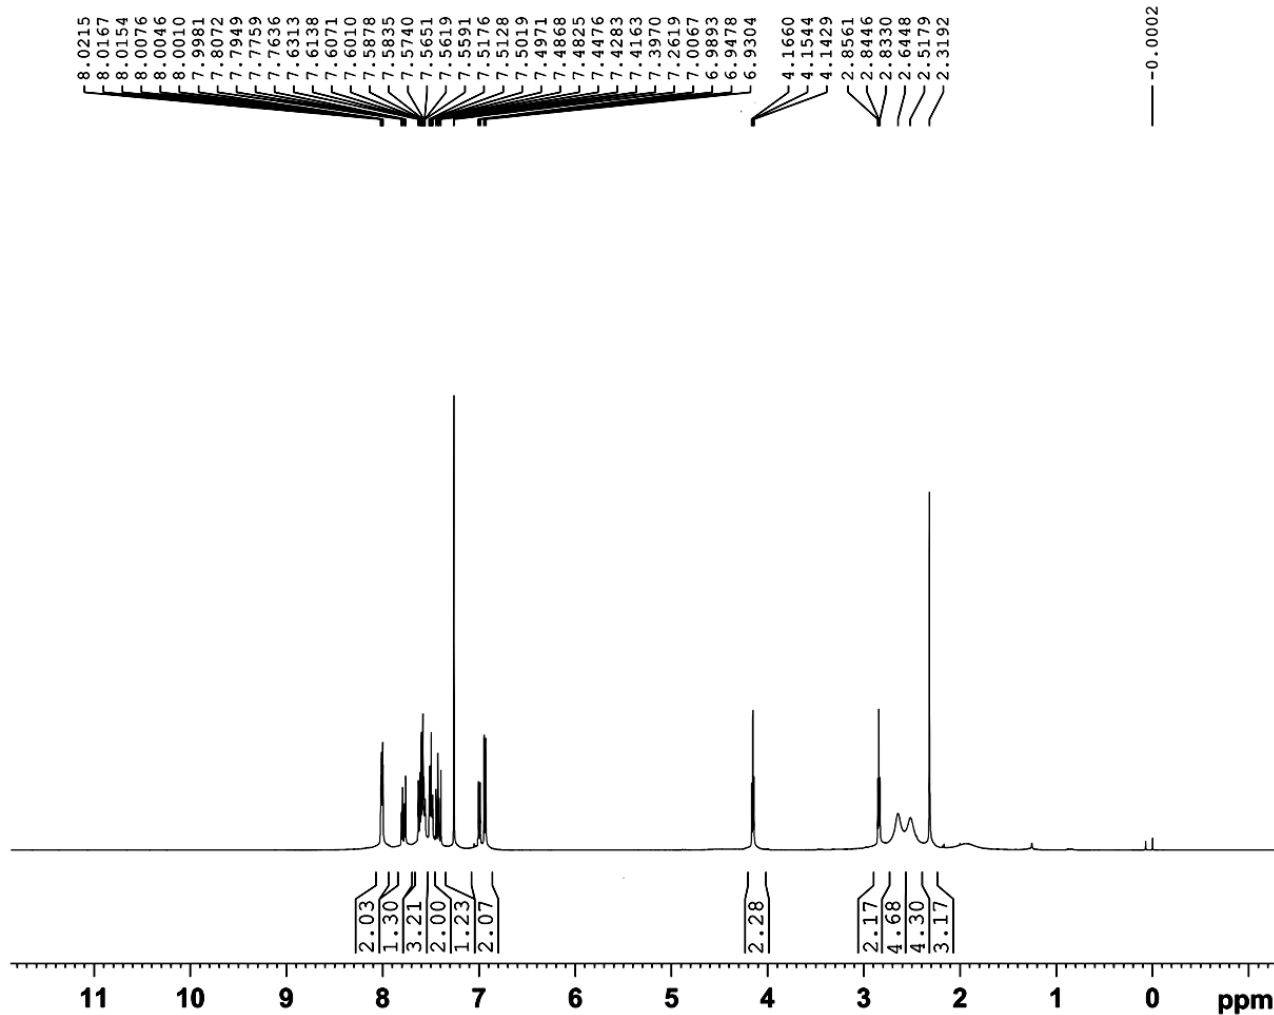

BRUKER  
AVANCE NEO  
500 MHz NMR  
SPECTROMETER  
SAIF, P.U.

Current Data Parameters  
NAME Jan25-2022-nmr  
EXPNO 21  
PROCNO 1

F2 - Acquisition Parameters  
Date\_ 20220127  
Time 7.32 h  
INSTRUM Avance Neo 500  
PROBHD Z119470\_0333 (  
PULPROG zg30  
TD 65536  
SOLVENT CDCl3  
NS 16  
DS 0  
SWH 14705.883 Hz  
FIDRES 0.448788 Hz  
AQ 2.2282240 sec  
RG 101  
DW 34.000 usec  
DE 6.79 usec  
TE 300.2 K  
D1 1.00000000 sec  
TD0 1  
SFO1 500.1730885 MHz  
NUC1 1H  
P0 3.33 usec  
P1 10.00 usec  
PLW1 20.93000031 W

F2 - Processing parameters  
SI 65536  
SF 500.1700113 MHz  
WDW EM  
SSB 0  
LB 0.30 Hz  
GB 0  
PC 1.00

CH-O7MP  
C13CPD CDC13 {D:\Spectra} nmr 2

BRUKER  
AVANCE NEO  
500 MHz NMR SPECTROMETER  
SAIF, PANJAB UNIVERSITY,  
CHANDIGARH

Current Data Parameters  
NAME Jan25-2022-nmr  
EXPNO 22  
PROCNO 1

F2 - Acquisition Parameters  
Date\_ 20220127  
Time\_ 7.58 h  
INSTRUM Avance Neo 500  
PROBHD Z119470\_0333 (  
PULPROG zgpg30  
TD 65536  
SOLVENT CDC13  
NS 512  
DS 4  
SWH 37037.035 Hz  
FIDRES 1.130281 Hz  
AQ 0.8847360 sec  
RG 101  
DW 13.500 usec  
DE 6.50 usec  
TE 300.2 K  
D1 2.00000000 sec  
D11 0.03000000 sec  
TD0 1  
SFO1 125.7804233 MHz  
NUC1 13C  
P0 3.33 usec  
P1 10.00 usec  
PLW1 83.14099884 W  
SFO2 500.1720007 MHz  
NUC2 1H  
CPDPRG[2] waltz65  
PCPD2 80.00 usec  
PLW2 20.93000031 W  
PLW12 0.32703000 W  
PLW13 0.16449000 W

F2 - Processing parameters  
SI 32768  
SF 125.7678465 MHz  
WDW EM  
SSB 0  
LB 1.00 Hz  
GB 0  
PC 1.40

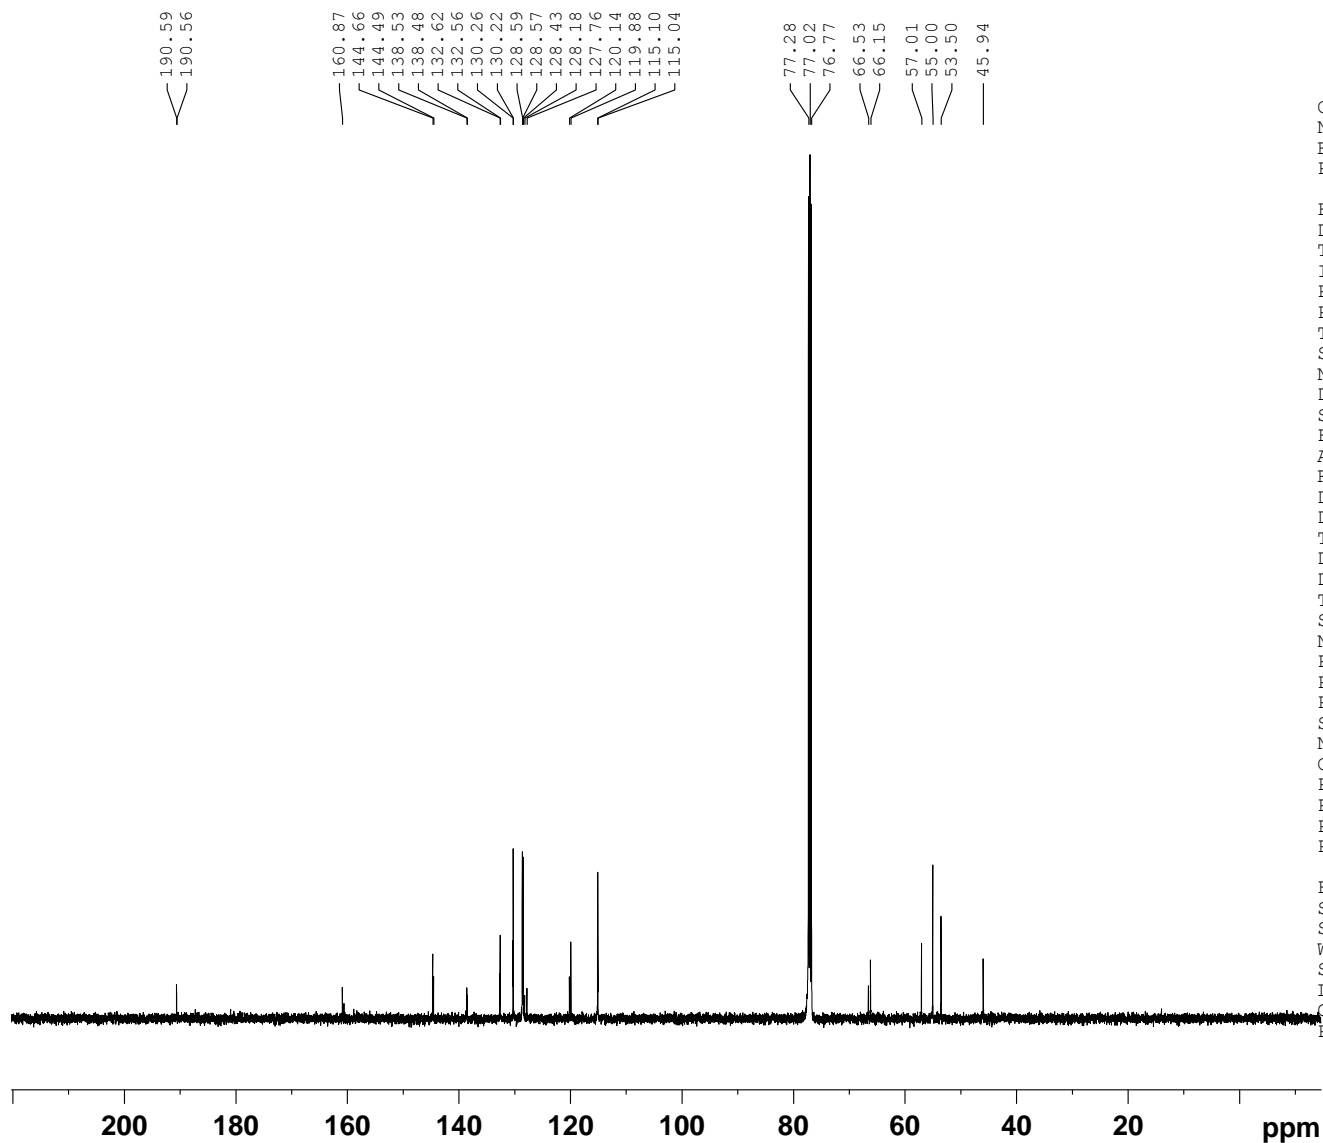

CH-O7MP  
C13CPD CDC13 {D:\Spectra} nmr 2

BRUKER  
AVANCE NEO  
500 MHz NMR SPECTROMETER  
SAIF, PANJAB UNIVERSITY,  
CHANDIGARH

Current Data Parameters  
NAME Jan25-2022-nmr  
EXPNO 22  
PROCNO 1

F2 - Acquisition Parameters  
Date\_ 20220127  
Time 7.58 h  
INSTRUM Avance Neo 500  
PROBHD Z119470\_0333 (  
PULPROG zgpg30  
TD 65536  
SOLVENT CDC13  
NS 512  
DS 4  
SWH 37037.035 Hz  
FIDRES 1.130281 Hz  
AQ 0.8847360 sec  
RG 101  
DW 13.500 usec  
DE 6.50 usec  
TE 300.2 K  
D1 2.00000000 sec  
D11 0.03000000 sec  
TD0 1  
SFO1 125.7804233 MHz  
NUC1 13C  
P0 3.33 usec  
P1 10.00 usec  
PLW1 83.14099884 W  
SFO2 500.1720007 MHz  
NUC2 1H  
CPDPRG[2] waltz65  
PCPD2 80.00 usec  
PLW2 20.93000031 W  
PLW12 0.32703000 W  
PLW13 0.16449000 W

F2 - Processing parameters  
SI 32768  
SF 125.7678465 MHz  
WDW EM  
SSB 0  
LB 1.00 Hz  
GB 0  
PC 1.40

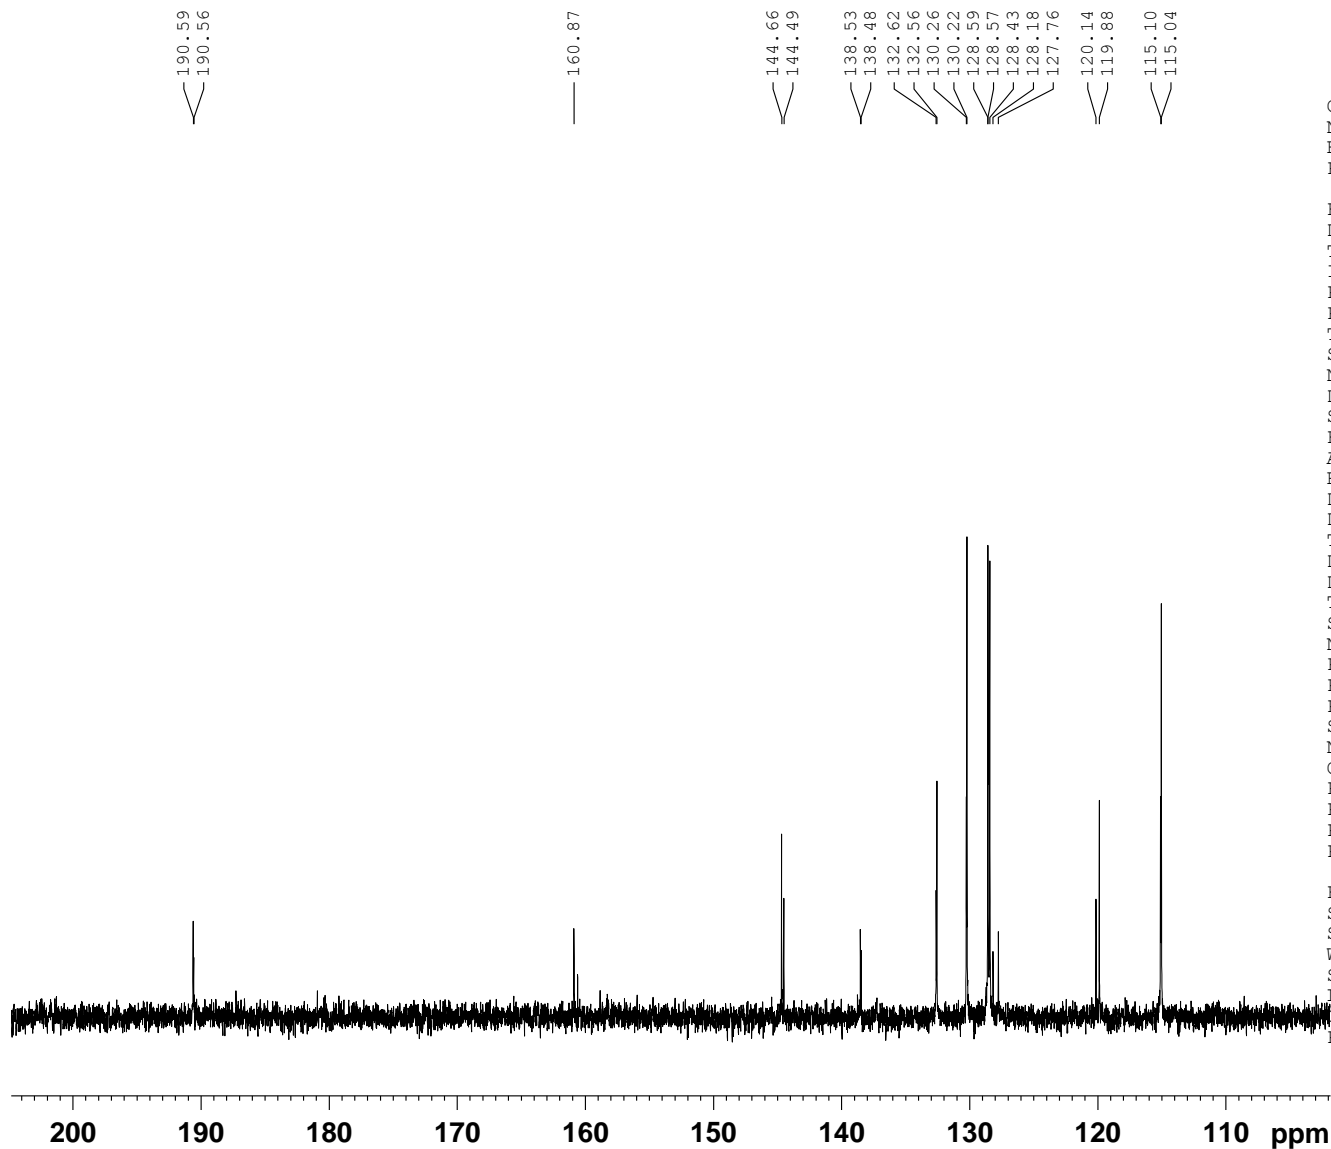

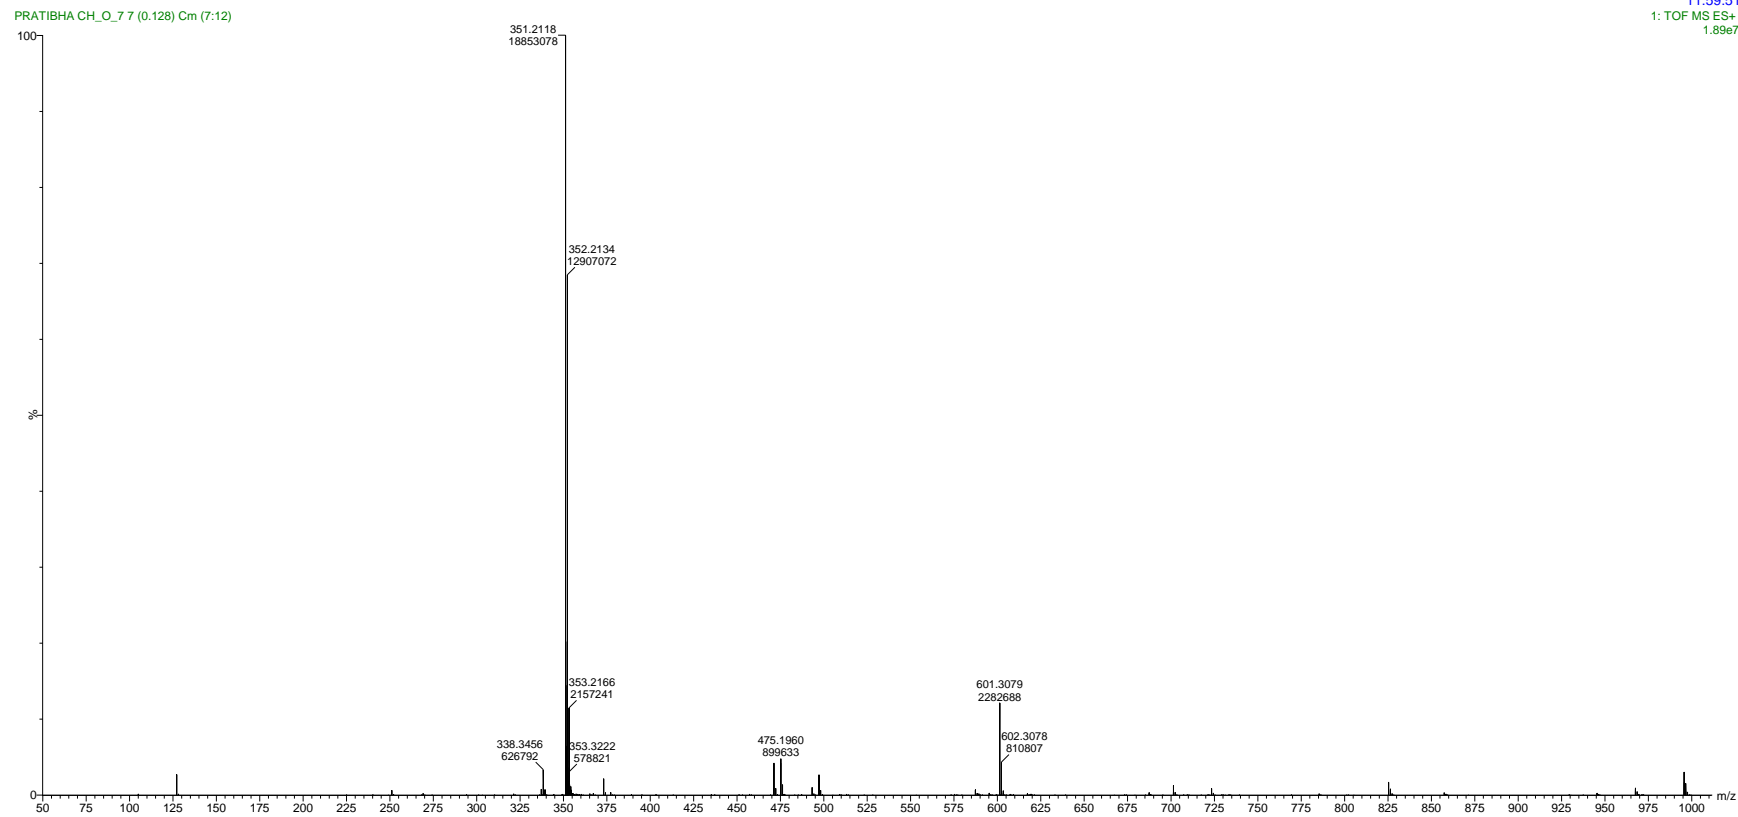

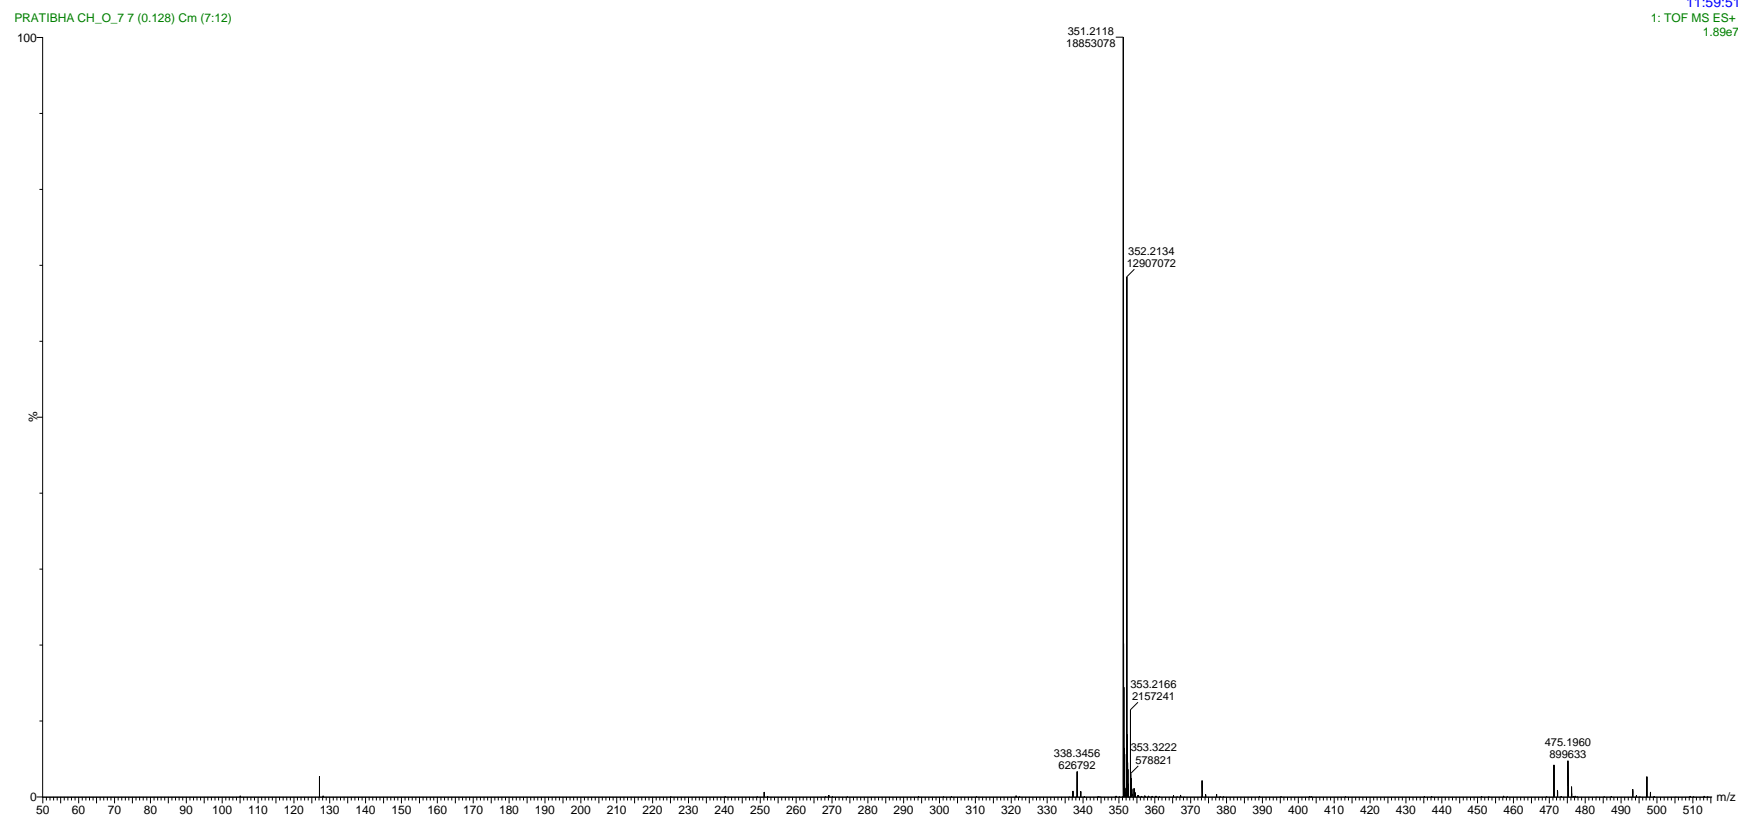

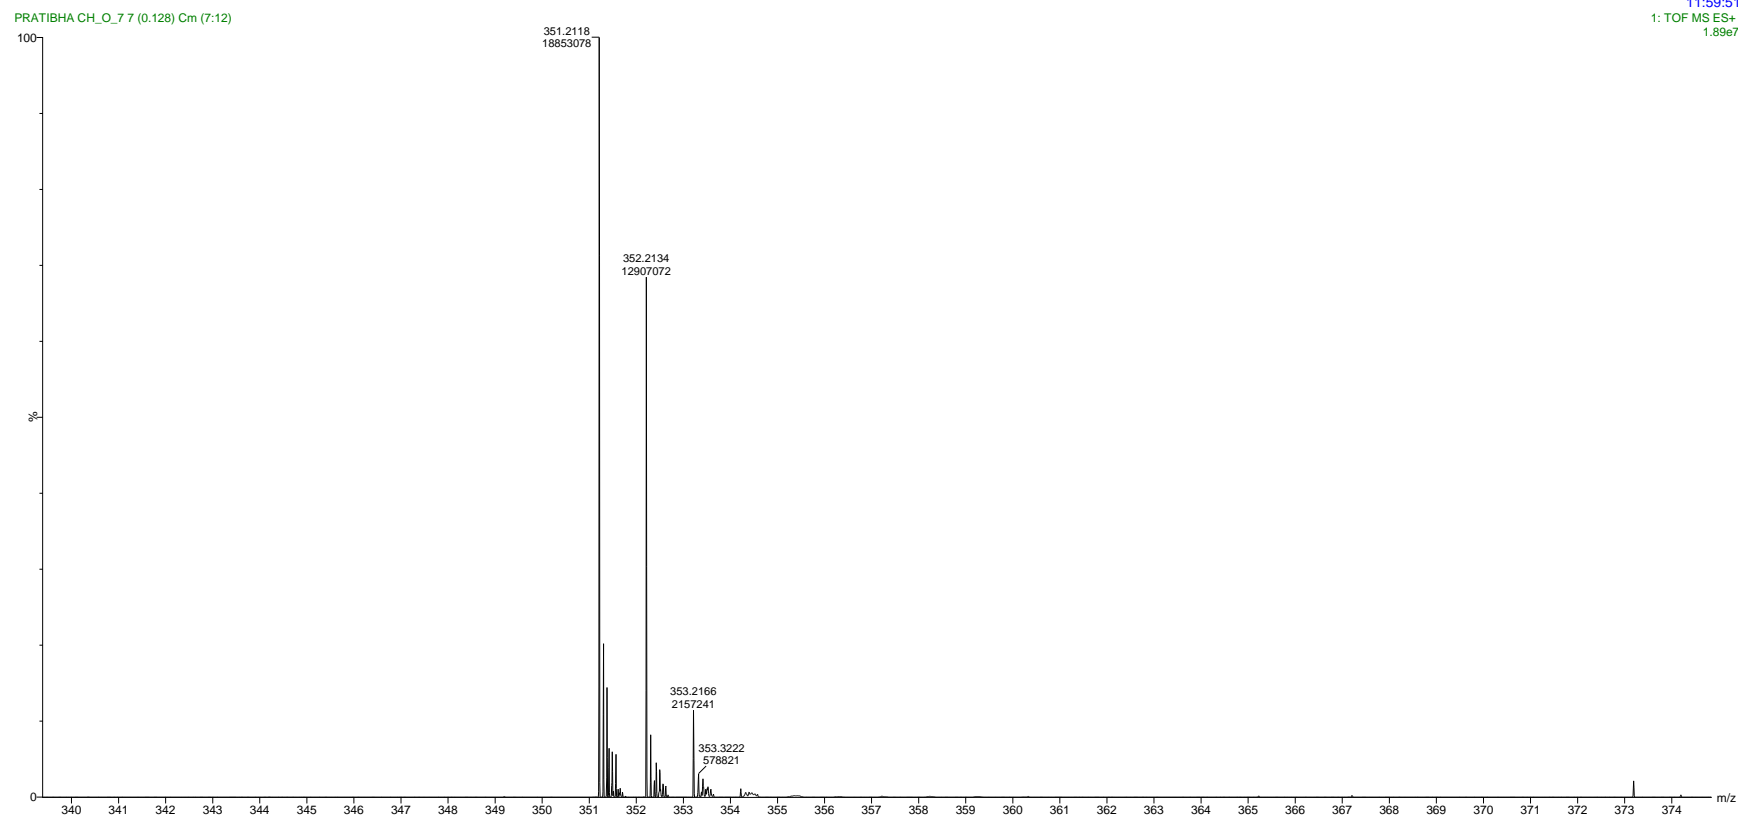



| S.No. | SMILES                                                           |
|-------|------------------------------------------------------------------|
| 1     | <chem>CN(C)CCOC1CCC(C=CC(=O)C2CCCCC2)CC1</chem>                  |
| 2     | <chem>CCN(CC)CCOC1=CC=C(C=CC(C2=CC=CC=C2)=O)C=C1</chem>          |
| 3     | <chem>CN(CCOC1=CC=C(C=CC(C2=CC=CC=C2)=O)C=C1)CC3=CC=CC=C3</chem> |
| 4     | <chem>O=C(C=CC1=CC=C(OCCN2CCCCC2)C=C1)C3=CC=CC=C3</chem>         |
| 5     | <chem>O=C(C=CC1=CC=C(OCCN2CCNCC2)C=C1)C3=CC=CC=C3</chem>         |
| 6     | <chem>O=C(C=CC1=CC=C(OCCN2CCOCC2)C=C1)C3=CC=CC=C3</chem>         |
| 7     | <chem>O=C(C=CC1=CC=C(OCCN2CCCC2)C=C1)C3=CC=CC=C3</chem>          |
| 8     | <chem>O=C(C=CC1=CC=C(OCCN2C=NC=C2)C=C1)C3=CC=CC=C3</chem>        |
| 9     | <chem>CN1CCN(CCOC2CCC(C=CC(=O)C3CCCCC3)CC2)CC1</chem>            |
| 10    | <chem>O=C(C1=CC=CC=C1)C=CC2=CC=C(OCCCN3CCN(C)CC3)C=C2</chem>     |
| 11    | <chem>O=C(C1=CC=CC=C1)C=CC2=CC=C(OCCCN3CCCCC3)C=C2</chem>        |
| 12    | <chem>O=C(C=CC1=CC=C(C=C1)OCCCN2CCN(C)CC2)C3=CC=CC=C3</chem>     |
| 13    | <chem>O=C(C=CC1=CC=C(C=C1)OCCCN2CCCCC2)C3=CC=CC=C3</chem>        |
| 14    | <chem>O=C(C=CC1=CC=C(C=C1)OCCCN2CCN(C)CC2)C3=CC=CC=C3</chem>     |
| 15    | <chem>O=C(C=CC1=CC=C(C=C1)OCCCN2CCCCC2)C3=CC=CC=C3</chem>        |

16 O=C(C=CC1=CC=C(C=C1)OCCCCCN2CCN(C)CC2)C3=CC=CC=C3

17 O=C(C=CC1=CC=C(C=C1)OCCCCCN2CCCC2)C3=CC=CC=C3

18 CN1CCN(CCOC2=CC=C(C=CC(C3=CC=C(OC)C=C3)=O)C=C2)CC1

19 CN1CCN(CCOC2=CC=C(C=CC(C3=CC=C(OC)C(OC)=C3)=O)C=C2)CC1

20 CN1CCN(CCOC2=CC=C(C=CC(C3=C(OC)C=C(OC)C=C3OC)=O)C=C2)CC1

21 COC1CCC(CC1)C(=O)C=CC1CCC(CC1)OCCN(C)C

22 CCN(CCOC1CCC(CC1)C=CC(=O)C1CCC(CC1)OC)C

23 COC1CCC(CC1)C(=O)C=CC1CCC(CC1)OCCCN(C)C

24 COC1CCC(CC1)C(=O)C=CC1CCC(CC1)OCN1CCCC1

25 CCCN(CCOC1CCC(CC1)C=CC(=O)C1CCC(CC1)OC)C

26 CCN(CCCOC1CCC(CC1)C=CC(=O)C1CCC(CC1)OC)C

27 CCN(CCOC1CCC(CC1)C=CC(=O)C1CCC(CC1)OC)CC

28 COC1CCC(CC1)C(=O)C=CC1CCC(CC1)OCCCN(C)C

29 COC1CCC(CC1)C(=O)C=CC1CCC(CC1)OCCN1CCCC1

30 CCN(CCCOC1CCC(CC1)C=CC(=O)C1CCC(CC1)OC)CC

31 COC1CCC(CC1)C(=O)C=CC1CCC(CC1)OCCCN1CCCC1

32 COC1CCC(CC1)C(=O)C=CC1CCC(CC1)OCCN1CCNCC1

33 COC1CCC(CC1)C(=O)C=CC1CCC(CC1)OCCN1CCOCC1

34 COC1CCC(CC1)C(=O)C=CC1CCC(CC1)OCCN1CCCCC1

35 COC1CCC(CC1)C(=O)C=CC1CCC(CC1)OCCCCN1CCCC1

36 COC1CCC(CC1)C(=O)C=CC1CCC(CC1)OCCCN1CCCCC1

37 COC1CCC(CC1)C(=O)C=CC1CCC(CC1)OCCCN1CCOCC1

38 COC1CCC(CC1)C(=O)C=CC1CCC(CC1)OCCN1CCC(CC1)C

39 COC1CCC(CC1)C(=O)C=CC1CCC(CC1)OCCN1CCN(CC1)C

40 COC1CCC(C(C=CC2CCC(OCCN(C)C3CCCCC3)CC2)=O)CC1

41 O=C(C=CC1CCC(OCC2CCCCC2)CC1)C1CCCCC1

42 O=C(C=CC1CCC(OC2CCCCC2)CC1)C1CCCCC1

43 O=C(C=CC1CCC(CC2CCCCC2)CC1)C1CCCCC1

44 CCCCOC1CCC(C=CC(=O)C2CCCCC2)CC1

45 CCCCOC1CCC(C=CC(=O)C2CCCCC2)CC1

46 O=C(C=CC1CCC(NCC2CCCCC2)CC1)C1CCCCC1

47 CC1CCC(OC2CCC(C=CC(=O)C3CCCCC3)CC2)CC1

48 CC1CCC(COC2CCC(C=CC(=O)C3CCCCC3)CC2)CC1

49 O=C(C=CC1CCC(OC2CCC(CL)CC2)CC1)C1CCCCC1

50 CCCCCOC1CCC(C=CC(=O)C2CCCCC2)CC1

51 CCCCCOC1CCC(C=CC(=O)C2CCCCC2)CC1

52 CCCCCOC1CCC(C=CC(=O)C2CCCCC2)CC1

53 COC1CCC(OC2CCC(C=CC(=O)C3CCCCC3)CC2)CC1

54 O=C(C=CC1CCC(OCCC2CCCCC2)CC1)C1CCCCC1

55 O=C(C=CC1CCC(OC2CCC(F)CC2)CC1)C1CCCCC1

56 O=C(C=CC1CCC(OCC2CCC(CL)CC2)CC1)C1CCCCC1

57 O=C(C=CC1CCC(OCC2CCC(F)CC2)CC1)C1CCCCC1

58 COC1CCC(COC2CCC(C=CC(=O)C3CCCCC3)CC2)CC1

59 O=C(C=CC1CCC(OC(=O)C2CCCCC2)CC1)C1CCCCC1

60 COCCOC1CCC(C=CC(=O)C2CCCCC2)CC1

61 CC(=O)C1CCC(-C2CCC(C=CC(=O)C3CCCCC3)CC2)CC1

62 CCCCCOC1CCC(C=CC(=O)C2CCCCC2)CC1

63 CCCCCOC1CCC(C=CC(=O)C2CCCCC2)CC1

64 COC1CCCCC1OC1CCC(C=CC(=O)C2CCCCC2)CC1

65 CCCCC(=O)NC1CCC(C=CC(=O)C2CCCCC2)CC1

66 O=C(C=CC1CCC(OCCOC2CCCCC2)CC1)C1CCCCC1

67 CC1CCCC(OC2CCC(C=CC(=O)C3CCCCC3)CC2)C1

68 CC1CCCC(COC2CCC(C=CC(=O)C3CCCCC3)CC2)C1

69 CC(C)C1CCC(-C2CCC(C=CC(=O)C3CCCCC3)CC2)CC1

70 O=C(C=CC1CCC(CN2CCCCC2)CC1)C1CCCCC1

71 O=C(C=CC1CCC(OC2CCC(BR)CC2)CC1)C1CCCCC1

72 NC(=O)C1CCC(-C2CCC(C=CC(=O)C3CCCCC3)CC2)CC1

73 CC1CCCCC1COC1CCC(C=CC(=O)C2CCCCC2)CC1

74 O=C(C=CC1CCC(OC2CCCCC2F)CC1)C1CCCCC1

75 O=C(O)CCCC1CCC(C=CC(=O)C2CCCCC2)CC1

76 O=C(C=CC1CCC(OCC2CCCC(CL)C2)CC1)C1CCCCC1

77 COC1CCCC(OC2CCC(C=CC(=O)C3CCCCC3)CC2)C1

78 CC(C)CNC(=O)C1CCC(C=CC(=O)C2CCCCC2)CC1

79 O=C(C=CC1CCC(OCC(=O)C2CCCCC2)CC1)C1CCCCC1

80 COC1CCCC(COC2CCC(C=CC(=O)C3CCCCC3)CC2)C1

81 O=C(C=CC1CCC(OCC2CCCC(F)C2)CC1)C1CCCCC1

82 COC(=O)COC1CCC(C=CC(=O)C2CCCCC2)CC1

83 O=C(C=CC1CCC(OCC2CCCCC2F)CC1)C1CCCCC1

84 CC1CCC(CCOC2CCC(C=CC(=O)C3CCCCC3)CC2)CC1

85 COCCCCOC1CCC(C=CC(=O)C2CCCCC2)CC1

86 CC(C)CCOC1CCC(C=CC(=O)C2CCCCC2)CC1

87 COC1CCCCC1COC1CCC(C=CC(=O)C2CCCCC2)CC1

88 O=C(C=CC1CCC(SCC2CCCCC2)CC1)C1CCCCC1

89 O=C(O)CCOC1CCC(C=CC(=O)C2CCCCC2)CC1

90 O=C(C=CC1CCC(OCCC2CCC(Cl)CC2)CC1)C1CCCCC1

91 COC1CCC(C(=O)OC2CCC(C=CC(=O)C3CCCCC3)CC2)CC1

92 CCOC(=O)COC1CCC(C=CC(=O)C2CCCCC2)CC1

93 O=C(C=CC1CCC(OCCC2CCC(F)CC2)CC1)C1CCCCC1

94 O=C(C=CC1CCC(OCCCCO)CC1)C1CCCCC1

95 COCCCCOC1CCC(C=CC(=O)C2CCCCC2)CC1

96 NC1CCC(OC2CCC(C=CC(=O)C3CCCCC3)CC2)CC1

97 CCOCCOC1CCC(C=CC(=O)C2CCCCC2)CC1

98 CNC(=O)COC1CCC(C=CC(=O)C2CCCCC2)CC1

99 NCCCCOC1CCC(C=CC(=O)C2CCCCC2)CC1

100 NCCNC(=O)C1CCC(C=CC(=O)C2CCCCC2)CC1

101 O=C(C=CC1CCC(OCCNC2CCCCC2)CC1)C1CCCCC1

102 O=C(O)CCCCOC1CCC(C=CC(=O)C2CCCCC2)CC1

103 NCCC(=O)NC1CCC(C=CC(=O)C2CCCCC2)CC1

104 CC(C)CCCOC1CCC(C=CC(=O)C2CCCCC2)CC1

105 CN(C)CCCC1CCC(C=CC(=O)C2CCCCC2)CC1

106 CN(C)CCCC1CCC(C=CC(=O)C2CCCCC2)CC1

107 NCCCN(C=O)C1CCC(C=CC(=O)C2CCCCC2)CC1

108 CC1CCCC(CCOC2CCC(C=CC(=O)C3CCCCC3)CC2)C1

109 O=C(C=CC1CCC(CN2CCOCC2)CC1)C1CCCCC1

110 O=C(C=CC1CCC(OCC2CCCN2)CC1)C1CCCCC1

111 O=C(C=CC1CCC(OCCCCCO)CC1)C1CCCCC1

112 CNCCCC1CCC(C=CC(=O)C2CCCCC2)CC1

113 COCCNCC1CCC(C=CC(=O)C2CCCCC2)CC1

114 COC(=O)CCOC1CCC(C=CC(=O)C2CCCCC2)CC1

115 O=C(C=CC1CCC(SC2CCCCC2)CC1)C1CCCCC1

116 CC(=O)NCCOC1CCC(C=CC(=O)C2CCCCC2)CC1

117 O=C(C=CC1CCC(OC(=O)C2CCCCC2Cl)CC1)C1CCCCC1

118 CCOC(=O)CCCC1CCC(C=CC(=O)C2CCCCC2)CC1

119 NC(=O)CCOC1CCC(C=CC(=O)C2CCCCC2)CC1

120 CNCCOC1CCC(C=CC(=O)C2CCCCC2)CC1

121 CN(C)CC(=O)NC1CCC(C=CC(=O)C2CCCCC2)CC1

122 CN(C)CC(=O)NC1CCC(C=CC(=O)C2CCCCC2)CC1

123 CC(C)NC(=O)COC1CCC(C=CC(=O)C2CCCCC2)CC1

124 CC(C)CCCCOC1CCC(C=CC(=O)C2CCCCC2)CC1

125 CN(C)CC1CCC(-C2CCC(C=CC(=O)C3CCCCC3)CC2)CC1

126 O=C(C=CC1CCC(OCC2CCCCN2)CC1)C1CCCCC1

127 COC1CCCC(C(=O)OC2CCC(C=CC(=O)C3CCCCC3)CC2)C1



128 CCC(=O)OCC1CCC(C=CC(=O)C2CCCCC2)CC1

129 NCCCCOC1CCC(C=CC(=O)C2CCCCC2)CC1

130 CN1CCN(CC2CCC(C=CC(=O)C3CCCCC3)CC2)CC1

131 O=C(CCC1CCCCC1)OC1CCC(C=CC(=O)C2CCCCC2)CC1

132 COC(=O)CCCOCC1CCC(C=CC(=O)C2CCCCC2)CC1

133 CN(C)CCCOCC1CCC(C=CC(=O)C2CCCCC2)CC1

134 CN(C)CCCOCC1CCC(C=CC(=O)C2CCCCC2)CC1

135 CN(C)CCCOCC1CCC(C=CC(=O)C2CCCCC2)CC1

136 CN(C)CCCOCC1CCC(C=CC(=O)C2CCCCC2)CC1

137 CN1CCN(C2CCC(C=CC(=O)C3CCCCC3)CC2)CC1

138 CC(=O)C1CCCC(OC2CCC(C=CC(=O)C3CCCCC3)CC2)C1

139 NCCCCNC(=O)C1CCC(C=CC(=O)C2CCCCC2)CC1

140 O=C(C=CC1CCC(-C2CCC(C(F)(F)F)CC2)CC1)C1CCCCC1

141 O=C(C=CC1CCC(OC2CCCNC2)CC1)C1CCCCC1

142 CN(C)CCNC(=O)C1CCC(C=CC(=O)C2CCCCC2)CC1

143 CNCCCCOC1CCC(C=CC(=O)C2CCCCC2)CC1

144 CN(C)CCNC(=O)C1CCC(C=CC(=O)C2CCCCC2)CC1

145 CC(=O)OCCOC1CCC(C=CC(=O)C2CCCCC2)CC1

146 CN(C)CCCCC1CCC(C=CC(=O)C2CCCCC2)CC1

147 CN(C)CCCCC1CCC(C=CC(=O)C2CCCCC2)CC1

148 CN(C)CCCCC1CCC(C=CC(=O)C2CCCCC2)CC1

149 CCCC(=O)OC1CCC(C=CC(=O)C2CCCCC2)CC1

150 CCNCCOC1CCC(C=CC(=O)C2CCCCC2)CC1

151 CN(C)C1CCC(C(=O)NC2CCC(C=CC(=O)C3CCCCC3)CC2)CC1

152 CCNCCOC1CCC(C=CC(=O)C2CCCCC2)CC1

153 CCOCCCCOC1CCC(C=CC(=O)C2CCCCC2)CC1

154 CCCCC(=O)OC1CCC(C=CC(=O)C2CCCCC2)CC1

155 CC1CCCC(CCCOC2CCC(C=CC(=O)C3CCCCC3)CC2)C1

156 CCOC(=O)CCOC1CCC(C=CC(=O)C2CCCCC2)CC1

157 CC(=O)CCOC1CCC(C=CC(=O)C2CCCCC2)CC1

158 NC1CCCC(OC2CCC(C=CC(=O)C3CCCCC3)CC2)C1

159 COC(=O)C1CCCC(OC2CCC(C=CC(=O)C3CCCCC3)CC2)C1

160 O=C(C=CC1CCC(NCCCCO)CC1)C1CCCCC1

161 O=C(C=CC1CCC(CNC2CCCC2)CC1)C1CCCCC1

162 O=C(C=CC1CCC(OCCC2CCC(O)CC2)CC1)C1CCCCC1

163 CNCCCCC1CCC(C=CC(=O)C2CCCCC2)CC1

164 CC(=O)CCCOC1CCC(C=CC(=O)C2CCCCC2)CC1

165 CN(C)C(=O)COC1CCC(C=CC(=O)C2CCCCC2)CC1

166 CNCC1CCC(OC2CCC(C=CC(=O)C3CCCCC3)CC2)CC1

167 CCCCC(=O)OC1CCC(C=CC(=O)C2CCCCC2)CC1

168 O=C(C=CC1CCC(OCCN2CCCCC2)CC1)C1CCCCC1

169 CC1CCCCC1CCCOC1CCC(C=CC(=O)C2CCCCC2)CC1

170 O=C(C=CC1CCC(OC2CCC([N+](=O)[O-])CC2)CC1)C1CCCCC1

171 CCCNCCOC1CCC(C=CC(=O)C2CCCCC2)CC1

172 CN(C)C1CCC(OC2CCC(C=CC(=O)C3CCCCC3)CC2)CC1

173 O=C(C=CC1CCC(OCCCN2CCCC2)CC1)C1CCCCC1

174 O=C(C=CC1CCC(NCC2CCCN2)CC1)C1CCCCC1

175 O=C(C=CC1CCC(OC2CCCCN2)CC1)C1CCCCC1

176 N#CC1CCC(OC2CCC(C=CC(=O)C3CCCCC3)CC2)CC1

177 CN(C)CCC(=O)NC1CCC(C=CC(=O)C2CCCCC2)CC1

178 CN(C)CCC(=O)NC1CCC(C=CC(=O)C2CCCCC2)CC1

179 O=C(C=CC1CCC(OCC2CCC([N+](=O)[O-])CC2)CC1)C1CCCCC1

180 CN(C)C1CCCC(-C2CCC(C=CC(=O)C3CCCCC3)CC2)C1

181 CN(C)C1CCC(COC2CCC(C=CC(=O)C3CCCCC3)CC2)CC1

182 O=C(C=CC1CCC(NC2CCCN2)CC1)C1CCCCC1

183 CN(C)CCCCOC1CCC(C=CC(=O)C2CCCCC2)CC1

184 CN(C)CCCCOC1CCC(C=CC(=O)C2CCCCC2)CC1

185 CN(C)CCCCOC1CCC(C=CC(=O)C2CCCCC2)CC1

186 CC(C)(C)C1CCC(OC2CCC(C=CC(=O)C3CCCCC3)CC2)CC1

187 CCNCCCOC1CCC(C=CC(=O)C2CCCCC2)CC1

188 CN(C)CCCNC(=O)C1CCC(C=CC(=O)C2CCCCC2)CC1

189 O=C(C=CC1CCC(CCCCN2CCCC2)CC1)C1CCCCC1

190 NCCCN1CCC(C=CC(=O)C2CCCCC2)CC1

191 CNCCCCOC1CCC(C=CC(=O)C2CCCCC2)CC1

192 O=C(C=CC1CCC(C(=O)NCCN2CCCC2)CC1)C1CCCCC1

193 CN(C)CCCCC1CCC(C=CC(=O)C2CCCCC2)CC1

194 NC(=O)C1CCCC(NC2CCC(C=CC(=O)C3CCCCC3)CC2)C1

195 CN(C)CCCCC1CCC(C=CC(=O)C2CCCCC2)CC1

196 CNC(=O)CCOC1CCC(C=CC(=O)C2CCCCC2)CC1

197 CC(=O)CCCCOC1CCC(C=CC(=O)C2CCCCC2)CC1

198 O=C(C=CC1CCC(NC2CCNCC2)CC1)C1CCCCC1

199 CNC(=O)OCC1CCC(C=CC(=O)C2CCCCC2)CC1

200 CN(C)CC1CCCC(-C2CCC(C=CC(=O)C3CCCCC3)CC2)C1

201 NCCCC(=O)C1CCC(C=CC(=O)C2CCCCC2)CC1

202 CSCCOC1CCC(C=CC(=O)C2CCCCC2)CC1

203 CN(C)CC1CCC(OC2CCC(C=CC(=O)C3CCCCC3)CC2)CC1

204 CN(C)CCNC1CCC(C=CC(=O)C2CCCCC2)CC1

205 CN(C)CCNC1CCC(C=CC(=O)C2CCCCC2)CC1

206 O=C(C=CC1CCC(OCCN2CCCCC2)CC1)C1CCCCC1

207 CNC(=O)CCCOC1CCC(C=CC(=O)C2CCCCC2)CC1

208 O=C(C=CC1CCC(OC(=O)C2CCC2)CC1)C1CCCCC1

209 O=C(C=CC1CCC(OCCCN2CCCCC2)CC1)C1CCCCC1

210 O=C(C=CC1CCC(OCC2CCCS2)CC1)C1CCCCC1

211 CCNC(=O)OC1CCC(C=CC(=O)C2CCCCC2)CC1

212 O=C(C=CC1CCC(OCCC2CCCN2)CC1)C1CCCCC1

213 CC(C)OCCOC1CCC(C=CC(=O)C2CCCCC2)CC1

214 O=C(C=CC1CCC(OCCCN2CCCC2)CC1)C1CCCCC1

215 CN(C)C1CCC(C(=O)C2CCC(C=CC(=O)C3CCCCC3)CC2)CC1

216 O=C(CCN1CCCCC1)NC1CCC(C=CC(=O)C2CCCCC2)CC1

217 O=C(C=CC1CCC(C(=O)NCCN2CCCCC2)CC1)C1CCCCC1

218 O=C(C=CC1CCC(OCC2CCC(C(F)(F)F)CC2)CC1)C1CCCCC1

219 COCC(=O)OC1CCC(C=CC(=O)C2CCCCC2)CC1

220 CN(C)CCNCC1CCC(C=CC(=O)C2CCCCC2)CC1

221 CN(C)C1CCC(CCC2CCC(C=CC(=O)C3CCCCC3)CC2)CC1

222 O=C(C=CC1CCC(NCCN2CCCC2)CC1)C1CCCCC1

223 O=C(C=CC1CCC(OC(=O)C2CCCN2)CC1)C1CCCCC1

224 O=C(C=CC1CCC(OC2CCCCC2)CC1)C1CCCCC1

225 CN1CCN(CC2CCCC(C=CC(=O)C3CCCCC3)C2)CC1

226 CSCCCOC1CCC(C=CC(=O)C2CCCCC2)CC1

227 CCN(CC)CCOC1CCC(C=CC(=O)C2CCCCC2)CC1

228 COC(=O)CCCN1CCC(C=CC(=O)C2CCCCC2)CC1

229 CN(C)CC1CCCCC1-C1CCC(C=CC(=O)C2CCCCC2)CC1

230 CN(C)CCCN1CCC(C=CC(=O)C2CCCCC2)CC1

231 O=C(C=CC1CCC(OCCOCCO)CC1)C1CCCCC1

232 CC(C)(C)CCOC1CCC(C=CC(=O)C2CCCCC2)CC1

233 CN(C)CCC(=O)C1CCC(C=CC(=O)C2CCCCC2)CC1

234 CC(C)(C)OC(=O)COC1CCC(C=CC(=O)C2CCCCC2)CC1

235 CNCC1CCCCC1OC1CCC(C=CC(=O)C2CCCCC2)CC1

236 CN1CCN(C(=O)C2CCCC(C=CC(=O)C3CCCCC3)C2)CC1

237 O=C(C=CC1CCC(OC2CCC(N3CCCCC3)CC2)CC1)C1CCCCC1

238 CN(C)CCCOCC(=O)C1CCC(C=CC(=O)C2CCCCC2)CC1

239 CN(C)C1CCCC(OC2CCC(C=CC(=O)C3CCCCC3)CC2)C1

240 CCN(C)CCOC1CCC(C=CC(=O)C2CCCCC2)CC1

241 N#CCCOC1CCC(C=CC(=O)C2CCCCC2)CC1

242 CN(C)C1CCCC(OC2CCC(C=CC(=O)C3CCCCC3)CC2)C1

243 CCN(C)CCOC1CCC(C=CC(=O)C2CCCCC2)CC1

244 COC(=O)CSC1CCC(C=CC(=O)C2CCCCC2)CC1

245 CN(C)CCCC(=O)C1CCC(C=CC(=O)C2CCCCC2)CC1

246 CN(C)C(=O)CCOC1CCC(C=CC(=O)C2CCCCC2)CC1

247 O=C(C=CC1CCC(NCCCN2CCCC2)CC1)C1CCCCC1

248 CN(C)CCOCC1CCC(C=CC(=O)C2CCCCC2)CC1

249 CN(CCOC1CCC(C=CC(=O)C2CCCCC2)CC1)C1CCCCC1

250 CN(C)CC1CCCC(OC2CCC(C=CC(=O)C3CCCCC3)CC2)C1

251 CNCCCNC1CCC(C=CC(=O)C2CCCCC2)CC1

252 O=C(C=CC1CCC(NCCCC1)CC1)C1CCCCC1

253 CCN(C)CCCC1CCC(C=CC(=O)C2CCCCC2)CC1

254 CN1CCC(C2CCC(C=CC(=O)C3CCCCC3)CC2)CC1

255 O=C(C=CC1CCC(NCCC2CCNCC2)CC1)C1CCCCC1



256 O=C(C=CC1CCC(NC(C2CCCCC2)C2CCCCC2)CC1)C1CCCCC1

257 CC(C)NC(=O)OC1CCC(C=CC(=O)C2CCCCC2)CC1

258 O=C(C=CC1CCC(OCCNCCO)CC1)C1CCCCC1

259 CN1CCN(CCOC2CCC(C=CC(=O)C3CCCCC3)CC2)CC1

260 COC1CCCC(CC(=O)OC2CCC(C=CC(=O)C3CCCCC3)CC2)C1

261 CCN(CC)C(=O)COC1CCC(C=CC(=O)C2CCCCC2)CC1

262 CCN(CC)CCCOC1CCC(C=CC(=O)C2CCCCC2)CC1

263 O=C(C=CC1CCC(NCCC2CCCCN2)CC1)C1CCCCC1

264 CN(C)CCCCNC1CCC(C=CC(=O)C2CCCCC2)CC1

265 CN(C)CCCCNC1CCC(C=CC(=O)C2CCCCC2)CC1

266 CN(C)CCCCNC1CCC(C=CC(=O)C2CCCCC2)CC1

267 CC1CCN(CCOC2CCC(C=CC(=O)C3CCCCC3)CC2)CC1

268 CC1CCC(S(=O)(=O)OC2CCC(C=CC(=O)C3CCCCC3)CC2)CC1

269 CN(C)CC1CCCC(COC2CCC(C=CC(=O)C3CCCCC3)CC2)C1

270 CN(C)CCCCC(=O)C1CCC(C=CC(=O)C2CCCCC2)CC1

271 CN(C)CCCCC(=O)C1CCC(C=CC(=O)C2CCCCC2)CC1

272 O=C(C=CC1CCC(OCCCN2CCOCC2)CC1)C1CCCCC1

273 CC(C)(C)CCOC1CCC(C=CC(=O)C2CCCCC2)CC1

274 O=C(C=CC1CCCCC1)OC1CCC(C=CC(=O)C2CCCCC2)CC1

275 CN(C)CC1CCCCC1OC1CCC(C=CC(=O)C2CCCCC2)CC1

276 CCN(C)CCOC1CCC(C=CC(=O)C2CCCCC2)CC1

277 CCN(C)CCOC1CCC(C=CC(=O)C2CCCCC2)CC1

278 CCN(C)CCOC1CCC(C=CC(=O)C2CCCCC2)CC1

279 O=C(C=CC1CCC(NCCCN2CCCCC2)CC1)C1CCCCC1

280 CS(=O)(=O)CCOC1CCC(C=CC(=O)C2CCCCC2)CC1

281 CCC(=O)CCOC1CCC(C=CC(=O)C2CCCCC2)CC1

282 O=C(C=CC1CCC(OCC(=O)N2CCOCC2)CC1)C1CCCCC1

283 O=C(C=CC1CCC(OCN2CCCC2)CC1)C1CCCCC1

284 O=C(C=CC1CCC(CCCCN2CCOCC2)CC1)C1CCCCC1

285 O=C(C=CC1CCC(OC(=O)C2CCCO2)CC1)C1CCCCC1

286 CCCN(C)CCOC1CCC(C=CC(=O)C2CCCCC2)CC1

287 O=C(C=CC1CCC(C(=O)NCCN2CCOCC2)CC1)C1CCCCC1

288 CN(C)CCCC1CCCC(-C2CCC(C=CC(=O)C3CCCCC3)CC2)C1

289 O=C(C=CC1CCC(OCC2CCC3C(C2)OCO3)CC1)C1CCCCC1

290 CC(C)=CCOC1CCC(C=CC(=O)C2CCCCC2)CC1

291 CN(C)C1CCCCC1OC1CCC(C=CC(=O)C2CCCCC2)CC1

292 CN(C)C1CCCCC1OC1CCC(C=CC(=O)C2CCCCC2)CC1

293 O=C(C=CC1CCC(SC2CCC(O)CC2)CC1)C1CCCCC1

294 CC(C)(C)NCCOC1CCC(C=CC(=O)C2CCCCC2)CC1

295 O=C(C=CC1CCC(-C2CNN(CC3CCCCC3)C2)CC1)C1CCCCC1

296 O=C(C=CC1CCC(OC2CCC(N3CCOCC3)CC2)CC1)C1CCCCC1

297 CC1CCNC(OC2CCC(C=CC(=O)C3CCCCC3)CC2)C1

298 C=C(C)CCCOC1CCC(C=CC(=O)C2CCCCC2)CC1

299 CSCCCNC1CCC(C=CC(=O)C2CCCCC2)CC1

300 CC(C)N(C)CCOC1CCC(C=CC(=O)C2CCCCC2)CC1

301 CC(C)N(C)CCOC1CCC(C=CC(=O)C2CCCCC2)CC1

302 NC1CCN(C2CCC(C=CC(=O)C3CCCCC3)CC2)CC1

303 O=C(C=CC1CCC(OCCS(=O)(=O)O)CC1)C1CCCCC1

304 CN(C)CCOC(=O)NC1CCC(C=CC(=O)C2CCCCC2)CC1

305 CCN(CC)CCNC1CCC(C=CC(=O)C2CCCCC2)CC1

306 CN(C)CCC(=O)OC1CCC(C=CC(=O)C2CCCCC2)CC1

307 CN(C)CCC(=O)OC1CCC(C=CC(=O)C2CCCCC2)CC1

308 CN(C)CCC(=O)OC1CCC(C=CC(=O)C2CCCCC2)CC1

309 CN(C)CCC(=O)OC1CCC(C=CC(=O)C2CCCCC2)CC1

310 O=C(C=CC1CCC(-C2CCC(CO)O2)CC1)C1CCCCC1

311 CN1CCN(CCOC2CCCC(C=CC(=O)C3CCCCC3)C2)CC1

312 CN1CCC(COC2CCC(C=CC(=O)C3CCCCC3)CC2)CC1

313 O=C(C=CC1CCC(NCCN2CCOCC2)CC1)C1CCCCC1

314 CC(C)NCCCNC1CCC(C=CC(=O)C2CCCCC2)CC1

315 CN(C)CCCC(=O)OC1CCC(C=CC(=O)C2CCCCC2)CC1

316 O=C(C=CC1CCC(NCC(C2CCCCC2)C2CCCCC2)CC1)C1CCCCC1

317 CN(C)CCCC1CCCCC1-C1CCC(C=CC(=O)C2CCCCC2)CC1

318 CCN(CC)C(=O)OC1CCC(C=CC(=O)C2CCCCC2)CC1

319 CN1CCC(OC2CCC(C=CC(=O)C3CCCCC3)CC2)CC1

320 O=C(C=CC1CCC(OC(=O)N2CCOCC2)CC1)C1CCCCC1

321 O=C(C=CC1CCC(C(=O)NC2CCC(O)CC2)CC1)C1CCCCC1

322 CN(C)CC(=O)OC1CCC(C=CC(=O)C2CCCCC2)CC1

323 CC(C)(O)CCOC1CCC(C=CC(=O)C2CCCCC2)CC1

324 COC(=O)C1CC(OC2CCC(C=CC(=O)C3CCCCC3)CC2)CCC1O

325 CN(C)CC(=O)OC1CCC(C=CC(=O)C2CCCCC2)CC1

326 CN(C)CC(=O)OC1CCC(C=CC(=O)C2CCCCC2)CC1

327 CN(C)CC(=O)OC1CCC(C=CC(=O)C2CCCCC2)CC1

328 CN(C)CCC1CCCCC1OC1CCC(C=CC(=O)C2CCCCC2)CC1

329 CCN1CCC(OC2CCC(C=CC(=O)C3CCCCC3)CC2)CC1

330 COC(=O)C1CCC(OC2CCC(C=CC(=O)C3CCCCC3)CC2)CC1O

331 CCN1CCC(OC2CCC(C=CC(=O)C3CCCCC3)CC2)CC1

332 O=C(C=CC1CCC(OCCN2CCCC2=O)CC1)C1CCCCC1

333 CN(CCO)CCOC1CCC(C=CC(=O)C2CCCCC2)CC1

334 O=C(C=CC1CCC(NC2CCOCC2)CC1)C1CCCCC1

335 CCSCCCOC1CCC(C=CC(=O)C2CCCCC2)CC1

336 CN1CCN(C(=O)OC2CCC(C=CC(=O)C3CCCCC3)CC2)CC1

337 CN1CCN(C(=O)OC2CCC(C=CC(=O)C3CCCCC3)CC2)CC1

338 CCN(CC)CCCN1CCC(C=CC(=O)C2CCCCC2)CC1

339 CN(C)C1CCCCC1CNC1CCC(C=CC(=O)C2CCCCC2)CC1

340 CC(=O)OC1CCCCC1C(=O)OC1CCC(C=CC(=O)C2CCCCC2)CC1

341 CC(C)N(C)CCCO1CCC(C=CC(=O)C2CCCCC2)CC1

342 CC(C)N(C)CCCO1CCC(C=CC(=O)C2CCCCC2)CC1

343 CN(C)CCN1CCN(C2CCC(C=CC(=O)C3CCCCC3)CC2)CC1

344 CC(=O)N(C)CCCO1CCC(C=CC(=O)C2CCCCC2)CC1

345 CN1CC(COC2CCC(C=CC(=O)C3CCCCC3)CC2)C1

346 CN(CCCOC1CCC(C=CC(=O)C2CCCCC2)CC1)C1CC1

347 CC(=O)N(C)CCCO1CCC(C=CC(=O)C2CCCCC2)CC1

348 O=C(C=CC1CCC(NCCCN2CCOCC2)CC1)C1CCCCC1

349 CN(C)C(=O)NCCOC1CCC(C=CC(=O)C2CCCCC2)CC1

350 CN(C)CC1CCC(-C2CCC(C=CC(=O)C3CCCCC3)CC2)NC1

351 CN1CCN(CCCOC2CCCC(C=CC(=O)C3CCCCC3)C2)CC1

352 CN(C)C1CCCCC1C(=O)OC1CCC(C=CC(=O)C2CCCCC2)CC1

353 O=C(C=CC1CCC(OC2CCOCC2)CC1)C1CCCCC1

354 O=C(C=CC1CCC(OCCC(=O)N2CCOCC2)CC1)C1CCCCC1

355 CN(C)CCSC1CCC(C=CC(=O)C2CCCCC2)CC1

356 CN(C)CCSC1CCC(C=CC(=O)C2CCCCC2)CC1

357 CN(C)CCNC(=O)OC1CCC(C=CC(=O)C2CCCCC2)CC1

358 O=C(C=CC1CCC(OCCN2CCNCC2)CC1)C1CCCCC1

359 CN(C)CCNC(=O)OC1CCC(C=CC(=O)C2CCCCC2)CC1

360 CN1CCN(CCCCC=CC(=O)C2CCCCC2)CC1

361 CN(C)CCN(C)C1CCC(C=CC(=O)C2CCCCC2)CC1

362 CN(C)CCN(C)C1CCC(C=CC(=O)C2CCCCC2)CC1

363 O=C(C=CC1CCC(OCCCN2CCCC2=O)CC1)C1CCCCC1

364 O=C(C=CC1CCC(-C2CN(CC3CCCCC3)NN2)CC1)C1CCCCC1

365 O=C(C=CC1CCC(OC2CNCCN2)CC1)C1CCCCC1

366 CN(C)C1CCN(C(=O)C2CCC(C=CC(=O)C3CCCCC3)CC2)CC1

367 O=C(C=CC1CCC(OS(=O)(=O)CC2CCCCC2)CC1)C1CCCCC1

368 CC=CCCCOC1CCC(C=CC(=O)C2CCCCC2)CC1

369 CN(CCCOC1CCC(C=CC(=O)C2CCCCC2)CC1)C(=O)O

370 CNCCSC1CCC(C=CC(=O)C2CCCCC2)CC1

371 O=C(C=CC1CCC(SCCCN2CCCC2)CC1)C1CCCCC1

372 O=C(C=CC1CCC(OCCCN2CCCN2)CC1)C1CCCCC1

373 CC(=O)N1CCC(COC2CCC(C=CC(=O)C3CCCCC3)CC2)CC1

374 O=C(C=CC1CCC(OCCN2CCNC2)CC1)C1CCCCC1

375 CN1CCC(CCOC2CCC(C=CC(=O)C3CCCCC3)CC2)CC1

376 CN(C)CCCSC1CCC(C=CC(=O)C2CCCCC2)CC1

377 CNCCCSC1CCC(C=CC(=O)C2CCCCC2)CC1

378 CN1CCN(C2CCCC(OC3CCC(C=CC(=O)C4CCCCC4)CC3)C2)CC1

379 CN1CCN(CCCCCC=CC(=O)C2CCCCC2)CC1

380 O=C(CC1CCCS1)OC1CCC(C=CC(=O)C2CCCCC2)CC1

381 O=C(C=CC1CCC(NCCC(C2CCCCC2)C2CCCCC2)CC1)C1CCCCC1

382 O=C(C=CC1CCC(OCN2CCOCC2)CC1)C1CCCCC1

383 CC(=O)N1CCC(OC2CCC(C=CC(=O)C3CCCCC3)CC2)CC1



384 CC1CCC(CCCOC2CCC(C=CC(=O)C3CCCCC3)CC2)O1

385 O=C(C=CC1CCC(OCCCN2CCNCC2)CC1)C1CCCCC1

386 CN(CCCOC1CCC(C=CC(=O)C2CCCCC2)CC1)C1CCC1

387 CN(CCCOC1CCC(C=CC(=O)C2CCCCC2)CC1)C1CCC1

388 CN(C)CNC(=O)C1CCC(C=CC(=O)C2CCCCC2)CC1

389 CN(C)C1CCC(SC2CCC(C=CC(=O)C3CCCCC3)CC2)CC1

390 O=C(C=CC1CCC(OCC2CCNCC2)CC1)C1CCCCC1

391 CN(C)CCCCSC1CCC(C=CC(=O)C2CCCCC2)CC1

392 CN(C)CC1CCNC(-C2CCC(C=CC(=O)C3CCCCC3)CC2)C1

393 CN(C)CCCCSC1CCC(C=CC(=O)C2CCCCC2)CC1

394 CN(C)CCCCSC1CCC(C=CC(=O)C2CCCCC2)CC1

395 CC(C)(N)CCCOCC1CCC(C=CC(=O)C2CCCCC2)CC1

396 CN1CCN(COC2CCC(C=CC(=O)C3CCCCC3)CC2)CC1

397 CN(C)COC1CCC(-C2CCC(C=CC(=O)C3CCCCC3)CC2)CC1

398 CN(C)CCSCC1CCC(C=CC(=O)C2CCCCC2)CC1

399 O=C(C=CC1CCC(CNC2CCC(O)CC2)CC1)C1CCCCC1

400 O=C(C=CC1CCC(OC(=O)C(C2CCCCC2)C2CCCCC2)CC1)C1CCCCC1

401 O=C(C=CC1CCC(OC2CCNCC2)CC1)C1CCCCC1

402 CN(C)CCCN(C)C1CCC(C=CC(=O)C2CCCCC2)CC1

403 CC(C)N1CCC(COC2CCC(C=CC(=O)C3CCCCC3)CC2)CC1

404 CN(C)C1CCC(C2CCC(C=CC(=O)C3CCCCC3)CC2)CC1

405 CN(C)CC1CCC(-C2CCC(C=CC(=O)C3CCCCC3)CC2)O1

406 CC(C)(C)NS(=O)(=O)C1CCC(-C2CCC(C=CC(=O)C3CCCCC3)CC2)CC1

407 CN(CCCOC1CCC(C=CC(=O)C2CCCCC2)CC1)C(=O)C1CC1

408 CN(C)CCCS(=O)(=O)C1CCC(C=CC(=O)C2CCCCC2)CC1

409 CN(CCCOC1CCC(C=CC(=O)C2CCCCC2)CC1)C(=O)C1CC1

410 CN(C)CC1CCN(C2CCC(C=CC(=O)C3CCCCC3)CC2)CC1

411 CN(C)CCOCOC1CCC(C=CC(=O)C2CCCCC2)CC1

412 CC1CC(C)N(CCCOC2CCC(C=CC(=O)C3CCCCC3)CC2)N1

413 CN(CCCOC1CCC(C=CC(=O)C2CCCCC2)CC1)C(N)=O

414 CN(CCCOC1CCC(C=CC(=O)C2CCCCC2)CC1)C(N)=O

415 CC(C)N1CCC(OC2CCC(C=CC(=O)C3CCCCC3)CC2)CC1

416 O=C(C=CC1CCC(SC(C2CCCCC2)C2CCCCC2)CC1)C1CCCCC1

417 O=C(C=CC1CCC(OCCCN2CCNC2)CC1)C1CCCCC1

418 CN(CCCOC1CCC(C=CC(=O)C2CCCCC2)CC1)C1CCCCC1

419 CC(C)(C)NCCNC1CCC(C=CC(=O)C2CCCCC2)CC1

420 CN(CCCOC1CCC(C=CC(=O)C2CCCCC2)CC1)C1CCCCC1

421 O=C(C=CC1CCC(OC2CCC(O)CC2)CC1)C1CCCCC1

422 CN(C)CC=CC1CCC(C=CC(=O)C2CCCCC2)CC1

423 CN(C)CC=CC1CCC(C=CC(=O)C2CCCCC2)CC1

424 CC(C)(C)C(=O)OCOC1CCC(C=CC(=O)C2CCCCC2)CC1

425 C[Si](C)(C)CCCOC1CCC(C=CC(=O)C2CCCCC2)CC1

426 CCC(C)(C)CCCOC1CCC(C=CC(=O)C2CCCCC2)CC1

427 CCC(C)(C)CCCOC1CCC(C=CC(=O)C2CCCCC2)CC1

428 CN(C)CCCN(C)C1CCC(C=CC(=O)C2CCCCC2)CC1

429 O=C(C=CC1CCC(C#CCCO)CC1)C1CCCCC1

430 CC1NCCN1CCCOC1CCC(C=CC(=O)C2CCCCC2)CC1

431 O=C(C=CC1CCC(NCCCN2CCCC2=O)CC1)C1CCCCC1

432 O=C(C=CC1CCC(NCCN2CCNCC2)CC1)C1CCCCC1

433 CN(O)CCCOC1CCC(C=CC(=O)C2CCCCC2)CC1

434 CC(F)(F)CCCOC1CCC(C=CC(=O)C2CCCCC2)CC1

435 CN(O)CCCOC1CCC(C=CC(=O)C2CCCCC2)CC1

436 O=C(C=CC1CCC(OCCC2CCNCC2)CC1)C1CCCCC1

437 CCN(CC)COC1CCC(C=CC(=O)C2CCCCC2)CC1

438 CC(C)N1CC(OC2CCC(C=CC(=O)C3CCCCC3)CC2)C1

439 CCN(CCCN(C)C)C1CCC(C=CC(=O)C2CCCCC2)CC1

440 CN(C)CC(=O)N(C)C1CCC(C=CC(=O)C2CCCCC2)CC1

441 O=C(C=CC1CCC(C(=O)N2CCC(N3CCCCC3)CC2)CC1)C1CCCCC1

442 CN(C)CC(=O)N(C)C1CCC(C=CC(=O)C2CCCCC2)CC1

443 CC(C)CN1CCC(OC2CCC(C=CC(=O)C3CCCCC3)CC2)CC1

444 CC=C(C)CCCOC1CCC(C=CC(=O)C2CCCCC2)CC1

445 C=CCN(C)CCOC1CCC(C=CC(=O)C2CCCCC2)CC1

446 CC1CSC(CCCOC2CCC(C=CC(=O)C3CCCCC3)CC2)N1

447 CN(N)CCCOC1CCC(C=CC(=O)C2CCCCC2)CC1

448 CN(N)CCCOC1CCC(C=CC(=O)C2CCCCC2)CC1

449 CN(C)COCC1CCC(C=CC(=O)C2CCCCC2)CC1

450 CC1CNN(CCCOC2CCC(C=CC(=O)C3CCCCC3)CC2)C1

451 CN(C)COC1CCCC(-C2CCC(C=CC(=O)C3CCCCC3)CC2)C1

452 COC(=O)C=CCOC1CCC(C=CC(=O)C2CCCCC2)CC1

453 O=C(C=CC1CCC(NCCCN2CCNCC2)CC1)C1CCCCC1

454 CC1CCN(CCCOC2CCC(C=CC(=O)C3CCCCC3)CC2)N1

455 CC(C)(CO)CCCOC1CCC(C=CC(=O)C2CCCCC2)CC1

456 CN(C)CC1CCC(OC2CCC(C=CC(=O)C3CCCCC3)CC2)CC1O

457 COC1CCC2[NH]CC(CCOC3CCC(C=CC(=O)C4CCCCC4)CC3)C2C1

458 CN(C)CCCC=CC1CCC(C=CC(=O)C2CCCCC2)CC1

459 COC(C)(C)CCCOC1CCC(C=CC(=O)C2CCCCC2)CC1

460 COC(C)(C)CCCOC1CCC(C=CC(=O)C2CCCCC2)CC1

461 O=C(C=CC1CCC(SCCCN2CCOCC2)CC1)C1CCCCC1

462 CN(C)S(=O)(=O)CCOC1CCC(C=CC(=O)C2CCCCC2)CC1

463 CC1NOC(C)C1CCCOC1CCC(C=CC(=O)C2CCCCC2)CC1

464 CN(C)CCC1CCN(C2CCC(C=CC(=O)C3CCCCC3)CC2)CC1

465 CN(C)CCC1CCN(C2CCC(C=CC(=O)C3CCCCC3)CC2)CC1

466 CN(C)CCC=CC1CCC(C=CC(=O)C2CCCCC2)CC1

467 CC1NOC(CCCOC2CCC(C=CC(=O)C3CCCCC3)CC2)N1

468 CN(C)CC1CSC(-C2CCC(C=CC(=O)C3CCCCC3)CC2)N1

469 CC#CCCCOC1CCC(C=CC(=O)C2CCCCC2)CC1

470 CC1(CCCOC2CCC(C=CC(=O)C3CCCCC3)CC2)CC1

471 CN(C)CC1NC(-C2CCC(C=CC(=O)C3CCCCC3)CC2)NO1

472 CN(C)C1CCCC(SC2CCC(C=CC(=O)C3CCCCC3)CC2)C1

473 CC(C)(CN)CCCOC1CCC(C=CC(=O)C2CCCCC2)CC1

474 CC(CCCOC1CCC(C=CC(=O)C2CCCCC2)CC1)=NO

475 CC1CC(CCCOC2CCC(C=CC(=O)C3CCCCC3)CC2)ON1

476 CN(C)COC(=O)NC1CCC(C=CC(=O)C2CCCCC2)CC1

477 CN(C)CCCC(=O)N(C)C1CCC(C=CC(=O)C2CCCCC2)CC1

478 CC1CC(OC2CCC(C=CC(=O)C3CCCCC3)CC2)NO1

479 CN(C)CCCC1CCCC(-C2CCC(C=CC(=O)C3CCCCC3)CC2)N1

480 CNOCCCCOC1CCC(C=CC(=O)C2CCCCC2)CC1

481 O=C(C=CC1CCC(OCCCN2CCSCC2)CC1)C1CCCCC1

482 CN(C)CCC(=O)N(C)C1CCC(C=CC(=O)C2CCCCC2)CC1

483 CN(C)CCCC(C)(C)C1CCC(C=CC(=O)C2CCCCC2)CC1

484 O=C(C=CC1CCC(OCCN(CCO)CCO)CC1)C1CCCCC1

485 CC(=O)N(CCCOC1CCC(C=CC(=O)C2CCCCC2)CC1)C1CC1

486 C[N+](C)(C)CCCOC1CCC(C=CC(=O)C2CCCCC2)CC1

487 CN(C)C1CCC(OC2CCC(C=CC(=O)C3CCCCC3)CC2)CC1

488 C[N+](C)(C)CCCCOC1CCC(C=CC(=O)C2CCCCC2)CC1

489 CC(=O)N(O)CCCOC1CCC(C=CC(=O)C2CCCCC2)CC1

490 O=CNCCCNC1CCC(C=CC(=O)C2CCCCC2)CC1

491 CCC1NCCN1CCCOC1CCC(C=CC(=O)C2CCCCC2)CC1

492 CC1(CCCOC2CCC(C=CC(=O)C3CCCCC3)CC2)CCC1

493 CC(C)(C#N)CCCOC1CCC(C=CC(=O)C2CCCCC2)CC1

494 CN(CCCOC1CCC(C=CC(=O)C2CCCCC2)CC1)C(C)(C)C

495 CN(C)NC(=O)OC1CCC(C=CC(=O)C2CCCCC2)CC1

496 CN(C)CC1CC(-C2CCC(C=CC(=O)C3CCCCC3)CC2)NO1

497 O=C(C=CC1CCC(C#CCCCO)CC1)C1CCCCC1

498 CN(C)CCCC(C)(C)C1CCC(C=CC(=O)C2CCCCC2)CC1

499 CN(C)CCCC1CCC(-C2CCC(C=CC(=O)C3CCCCC3)CC2)O1

500 CN(C)CCNOC1CCC(C=CC(=O)C2CCCCC2)CC1

501 CC(=O)N(CCCN(C)C)C1CCC(C=CC(=O)C2CCCCC2)CC1

502 CCN1CCNC1CCCOC1CCC(C=CC(=O)C2CCCCC2)CC1

503 CN(C)C1CC(OC2CCC(C=CC(=O)C3CCCCC3)CC2)C1

504 CNC(C)(C)CCCOC1CCC(C=CC(=O)C2CCCCC2)CC1

505 CCN(C(=O)CCN(C)C)C1CCC(C=CC(=O)C2CCCCC2)CC1

506 CN(C)CCN(CCO)C1CCC(C=CC(=O)C2CCCCC2)CC1

507 CC1CN(CCCOC2CCC(C=CC(=O)C3CCCCC3)CC2)CN1

508 COC(=N)CCCOC1CCC(C=CC(=O)C2CCCCC2)CC1

509 CN1CCN(NC2CCC(C=CC(=O)C3CCCCC3)CC2)CC1

510 CN(C)CC1CC(-C2CCC(C=CC(=O)C3CCCCC3)CC2)ON1

511 CSC(=O)CCCOC1CCC(C=CC(=O)C2CCCCC2)CC1



512 CN(C)CCC(C)(C)C1CCC(C=CC(=O)C2CCCCC2)CC1

513 CN(CL)CCCOC1CCC(C=CC(=O)C2CCCCC2)CC1

514 CN(C)CC(=O)NCOC1CCC(C=CC(=O)C2CCCCC2)CC1

515 CN(C)CC(C)(C)COC1CCC(C=CC(=O)C2CCCCC2)CC1

516 CN(C)CC(C)(C)COC1CCC(C=CC(=O)C2CCCCC2)CC1

517 C=C(CCCN(C)C)C1CCC(C=CC(=O)C2CCCCC2)CC1

518 CC(C)=NOCCOC1CCC(C=CC(=O)C2CCCCC2)CC1

519 CN(C)NCCCC1CCC(C=CC(=O)C2CCCCC2)CC1

520 CN(CCCOC1CCC(C=CC(=O)C2CCCCC2)CC1)C(=N)N

521 CN(CCCOC1CCC(C=CC(=O)C2CCCCC2)CC1)C(=N)N

522 CN(C)CC#CC1CCC(C=CC(=O)C2CCCCC2)CC1

523 CN(C)OCCCC1CCC(C=CC(=O)C2CCCCC2)CC1

524 CN(C)OC1CCC(OC2CCC(C=CC(=O)C3CCCCC3)CC2)CC1

525 CC(=S)N(C)CCCOC1CCC(C=CC(=O)C2CCCCC2)CC1

526 CN(C)CCCC1CSC(-C2CCC(C=CC(=O)C3CCCCC3)CC2)N1

527 CN(C)CC(C)(C)OC1CCC(C=CC(=O)C2CCCCC2)CC1

528 CC1CNCN1CCCOC1CCC(C=CC(=O)C2CCCCC2)CC1

529 CN(C)CC(C)(C)OC1CCC(C=CC(=O)C2CCCCC2)CC1

530 CC(C)C1NCCN1CCCOC1CCC(C=CC(=O)C2CCCCC2)CC1

531 CC1NNNN1CCCOC1CCC(C=CC(=O)C2CCCCC2)CC1

532 CN=C(N)CCCOC1CCC(C=CC(=O)C2CCCCC2)CC1

533 CN(C)C(C)(C)COC1CCC(C=CC(=O)C2CCCCC2)CC1

534 CCN(O)CCCOC1CCC(C=CC(=O)C2CCCCC2)CC1

535 CON(C)CCCOC1CCC(C=CC(=O)C2CCCCC2)CC1

536 CC1CNC(C)N1CCCOC1CCC(C=CC(=O)C2CCCCC2)CC1

537 CSSCCOC1CCC(C=CC(=O)C2CCCCC2)CC1

538 O=C(C=CC1CCC(ON2CCCCC2)CC1)C1CCCCC1

539 CC(C)(C)N1CC(OC2CCC(C=CC(=O)C3CCCCC3)CC2)C1

540 CON(C)CCCOC1CCC(C=CC(=O)C2CCCCC2)CC1

541 C=C(C)N(C)CCCOC1CCC(C=CC(=O)C2CCCCC2)CC1

542 CN1CNC(CCOC2CCC(C=CC(=O)C3CCCCC3)CC2)C1

543 CN(C=O)CCCOC1CCC(C=CC(=O)C2CCCCC2)CC1

544 CN(C=O)CCCOCC1CCC(C=CC(=O)C2CCCCC2)CC1

545 CN(CCCOC1CCC(C=CC(=O)C2CCCCC2)CC1)C1CNC1

546 CN(C)CCCC1CNN(-C2CCC(C=CC(=O)C3CCCCC3)CC2)C1

547 CN1CNCC1CCOC1CCC(C=CC(=O)C2CCCCC2)CC1

548 CN(C)CCCC#CC1CCC(C=CC(=O)C2CCCCC2)CC1

549 CN(C)CC=CCOC1CCC(C=CC(=O)C2CCCCC2)CC1

550 CN(C)CC=CCOC1CCC(C=CC(=O)C2CCCCC2)CC1

551 CC(C)=NCCOC1CCC(C=CC(=O)C2CCCCC2)CC1

552 CN(C)C(C)(C)CCCOCC1CCC(C=CC(=O)C2CCCCC2)CC1

553 CN(C)C(C)(C)CCCOCC1CCC(C=CC(=O)C2CCCCC2)CC1

554 CN(C)CC1COC(-C2CCC(C=CC(=O)C3CCCCC3)CC2)N1

555 CN(C)C=CC(=O)OC1CCC(C=CC(=O)C2CCCCC2)CC1

556 CN(C)C=CC(=O)OC1CCC(C=CC(=O)C2CCCCC2)CC1

557 O=C(C=CC1CCC(NCCCC2NCC[NH]2)CC1)C1CCCCC1

558 CC(=N)N(C)CCCOCC1CCC(C=CC(=O)C2CCCCC2)CC1

559 CN=C(C)CCCOCC1CCC(C=CC(=O)C2CCCCC2)CC1

560 CN(C)CCCN(C1CCC(C=CC(=O)C2CCCCC2)CC1)S(C)(=O)=O

561 CN(C)CC1CNC(-C2CCC(C=CC(=O)C3CCCCC3)CC2)CN1

562 CC(C)N(CCCN(C)C)C1CCC(C=CC(=O)C2CCCCC2)CC1

563 CN(C)CCCC1NOC(-C2CCC(C=CC(=O)C3CCCCC3)CC2)N1

564 CN(F)CCCOCC1CCC(C=CC(=O)C2CCCCC2)CC1

565 CN(C)CCC#CC1CCC(C=CC(=O)C2CCCCC2)CC1

566 CN(C)CCCN(C1CCC(C=CC(=O)C2CCCCC2)CC1)C1CC1

567 CN(C)CNC(=O)OC1CCC(C=CC(=O)C2CCCCC2)CC1

568 CN(C)COCOC1CCC(C=CC(=O)C2CCCCC2)CC1

569 CN(CCCOC1CCC(C=CC(=O)C2CCCCC2)CC1)N=O

570 CC(=CCCCN(C)C)C1CCC(C=CC(=O)C2CCCCC2)CC1

571 CN(C)CCCSC(=O)C1CCC(C=CC(=O)C2CCCCC2)CC1

572 CC(C)=COCCOC1CCC(C=CC(=O)C2CCCCC2)CC1

573 CN(C)CC=CCC1CCC(C=CC(=O)C2CCCCC2)CC1

574 CN(C)CCCC(=NO)C1CCC(C=CC(=O)C2CCCCC2)CC1

575 CN(C)CCC(C)(C)OC1CCC(C=CC(=O)C2CCCCC2)CC1

576 CO[Si](C)(C)CCCOCC1CCC(C=CC(=O)C2CCCCC2)CC1

577 CN(C)CCCNC(C)(C)C1CCC(C=CC(=O)C2CCCCC2)CC1

578 CN(C)CCCC1CC(-C2CCC(C=CC(=O)C3CCCCC3)CC2)ON1

579 CN(BR)CCCOCC1CCC(C=CC(=O)C2CCCCC2)CC1

580 CN(C)CCCOOC1CCC(C=CC(=O)C2CCCCC2)CC1

581 CN(C)OC1CCCC(OC2CCC(C=CC(=O)C3CCCCC3)CC2)C1

582 CN(C)CCCOOC1CCC(C=CC(=O)C2CCCCC2)CC1

583 CN(C)CCOOC1CCC(C=CC(=O)C2CCCCC2)CC1

584 CN(C)CCOOC1CCC(C=CC(=O)C2CCCCC2)CC1

585 CC=NCCCOCC1CCC(C=CC(=O)C2CCCCC2)CC1

586 CN(C)OCCNC1CCC(C=CC(=O)C2CCCCC2)CC1

587 O=C(C=CC1CCC(OCCCN2CC=CCC2)CC1)C1CCCCC1

588 CN(C)CCCC1CCN(-C2CCC(C=CC(=O)C3CCCCC3)CC2)N1

589 CC(C)CCNOC1CCC(C=CC(=O)C2CCCCC2)CC1

590 CN(S)CCCOCC1CCC(C=CC(=O)C2CCCCC2)CC1

591 CC1(CCCOCC2CCC(C=CC(=O)C3CCCCC3)CC2)COC1

592 CN(C)CCCC(F)(F)C1CCC(C=CC(=O)C2CCCCC2)CC1

593 CN(C)CCCC1NCCN1-C1CCC(C=CC(=O)C2CCCCC2)CC1

594 CN(C)CCCC1(C2CCC(C=CC(=O)C3CCCCC3)CC2)CC1

595 CNN(C)CCCOC1CCC(C=CC(=O)C2CCCCC2)CC1

596 CNN(C)CCCOC1CCC(C=CC(=O)C2CCCCC2)CC1

597 CN(C)CCCOC(=N)C1CCC(C=CC(=O)C2CCCCC2)CC1

598 CC1NOC(-C2CCC(C=CC(=O)C3CCCCC3)CC2)C1CN(C)C

599 CC[N+](C)(C)CCCOC1CCC(C=CC(=O)C2CCCCC2)CC1

600 CC[N+](C)(C)CCCOC1CCC(C=CC(=O)C2CCCCC2)CC1

601 CN(C)CCCC1COC(-C2CCC(C=CC(=O)C3CCCCC3)CC2)N1

602 CNCCCCOOC1CCC(C=CC(=O)C2CCCCC2)CC1

603 CN(C)CCC1NCCN1-C1CCC(C=CC(=O)C2CCCCC2)CC1

604 CN(C)CCSCOC1CCC(C=CC(=O)C2CCCCC2)CC1

605 CN(C)CCCC1NNNN1-C1CCC(C=CC(=O)C2CCCCC2)CC1

606 CN(C)C=CCCOC1CCC(C=CC(=O)C2CCCCC2)CC1

607 CN1CCN(OC2CCC(C=CC(=O)C3CCCCC3)CC2)CC1

608 CN(C)OCOC1CCC(C=CC(=O)C2CCCCC2)CC1

609 C=CN(C)CCOC1CCC(C=CC(=O)C2CCCCC2)CC1

610 CN(C)CC#CCOC1CCC(C=CC(=O)C2CCCCC2)CC1

611 CN(C)CC#CCOC1CCC(C=CC(=O)C2CCCCC2)CC1

612 CN(CCCOC1CCC(C=CC(=O)C2CCCCC2)CC1)N1CC1

613 CN(I)CCOC1CCC(C=CC(=O)C2CCCCC2)CC1

614 CN(CCCOC1CCC(C=CC(=O)C2CCCCC2)CC1)C(F)F

615 CC1CCN(OC2CCC(C=CC(=O)C3CCCCC3)CC2)CC1

616 CP(C)(=O)CCOC1CCC(C=CC(=O)C2CCCCC2)CC1

617 CN(C)C1CC(-C2CCC(C=CC(=O)C3CCCCC3)CC2)ON1

618 O=C(C=CC1CCC(OCCC2C[NH]CN2)CC1)C1CCCCC1

619 CN(C)N(C)CCOC1CCC(C=CC(=O)C2CCCCC2)CC1

620 CC(=CN(C)C)COC1CCC(C=CC(=O)C2CCCCC2)CC1

621 O=C(C=CC1CCC(SC2CCNCC2)CC1)C1CCCCC1

622 CN(C)CCCNOC1CCC(C=CC(=O)C2CCCCC2)CC1

623 CN(C)CCCNOC1CCC(C=CC(=O)C2CCCCC2)CC1

624 CN(C)CCCNOC1CCC(C=CC(=O)C2CCCCC2)CC1

625 CC1NNN(CCCOC2CCC(C=CC(=O)C3CCCCC3)CC2)N1

626 CN(C)CCNOC1CCC(C=CC(=O)C2CCCCC2)CC1

627 CN(C)CCNOC1CCC(C=CC(=O)C2CCCCC2)CC1

628 CN(CCCOC1CCC(C=CC(=O)C2CCCCC2)CC1)[N+](=O)[O-]

629 CN(CCCOC1CCC(C=CC(=O)C2CCCCC2)CC1)C1CCCS1

630 CC1CN(C)C(CCCOC2CCC(C=CC(=O)C3CCCCC3)CC2)N1

631 C=C(CCN(C)C)OC1CCC(C=CC(=O)C2CCCCC2)CC1

632 CN(C)CCCC(=O)C(C)(C)C1CCC(C=CC(=O)C2CCCCC2)CC1

633 C=C(CN(C)C)OC1CCC(C=CC(=O)C2CCCCC2)CC1

634 CN(C)CC(=O)NOC1CCC(C=CC(=O)C2CCCCC2)CC1

635 CN(C)CCOC(C)(C)C1CCC(C=CC(=O)C2CCCCC2)CC1

636 CN(C)CC(=O)NOC1CCC(C=CC(=O)C2CCCCC2)CC1

637 CN(C)CCC(=O)NOC1CCC(C=CC(=O)C2CCCCC2)CC1

638 CN(C)N(C)CCOC1CCC(C=CC(=O)C2CCCCC2)CC1

639 CN(C)N(C)CCOC1CCC(C=CC(=O)C2CCCCC2)CC1



640 CN(CCCOC1CCC(C=CC(=O)C2CCCCC2)CC1)C1CCCO1

641 CSC(C)(C)CCCO1CCC(C=CC(=O)C2CCCCC2)CC1

642 CN(C)CCCSC1NNNN1-C1CCC(C=CC(=O)C2CCCCC2)CC1

643 CN(CCCOC1CCC(C=CC(=O)C2CCCCC2)CC1)N1CCC1

644 CN(C)CCCO1C(C)(C)C1CCC(C=CC(=O)C2CCCCC2)CC1

645 C[N+](C)([O-])CCCO1CCC(C=CC(=O)C2CCCCC2)CC1

646 CN(CCCOC1CCC(C=CC(=O)C2CCCCC2)CC1)C(F)(F)F

647 CC1CCC(CCCN(C)C)N1-C1CCC(C=CC(=O)C2CCCCC2)CC1

648 CN(C)C=CC=CC1CCC(C=CC(=O)C2CCCCC2)CC1

649 CN(CCCOC1CCC(C=CC(=O)C2CCCCC2)CC1)C(C)(C)O

650 CN(C#N)CCCO1CCC(C=CC(=O)C2CCCCC2)CC1

651 CN(C#N)CCCO1CCC(C=CC(=O)C2CCCCC2)CC1

652 CN(C)CC1(COC2CCC(C=CC(=O)C3CCCCC3)CC2)CC1

653 O=C(C=CC1CCC(NCCC2C[NH]CN2)CC1)C1CCCCC1

654 CC1NC(CCCN(C)C)SC1-C1CCC(C=CC(=O)C2CCCCC2)CC1

655 CC1=NCCN1CCCO1CCC(C=CC(=O)C2CCCCC2)CC1

656 COCC=COC1CCC(C=CC(=O)C2CCCCC2)CC1

657 CC(C)(CCOC1CCC(C=CC(=O)C2CCCCC2)CC1)[N+](=O)[O-]

658 O=C([O-])CCCN1CCC(C=CC(=O)C2CCCCC2)CC1

659 C[N+](C)(O)CCOC1CCC(C=CC(=O)C2CCCCC2)CC1

660 CC1NC(C)C(CCCOC2CCC(C=CC(=O)C3CCCCC3)CC2)O1

661 C[S+](C)CCOC1CCC(C=CC(=O)C2CCCCC2)CC1

662 CN(C)C(=O)COOC1CCC(C=CC(=O)C2CCCCC2)CC1

663 CN(CCCOC1CCC(C=CC(=O)C2CCCCC2)CC1)NN

664 CN(CCCOC1CCC(C=CC(=O)C2CCCCC2)CC1)NO

665 CC(=CN(C)C)OC1CCC(C=CC(=O)C2CCCCC2)CC1

666 CC[N+](C)(CC)CCOC1CCC(C=CC(=O)C2CCCCC2)CC1

667 CNC(=N)CCOC1CCC(C=CC(=O)C2CCCCC2)CC1

668 CN(CCCOC1CCC(C=CC(=O)C2CCCCC2)CC1)C(Cl)Cl

669 CN(C)CCCC1CN(-C2CCC(C=CC(=O)C3CCCCC3)CC2)CN1

670 CN(CCCOC1CCC(C=CC(=O)C2CCCCC2)CC1)C(=O)[O-]

671 CC(O)CCOC1CCC(C=CC(=O)C2CCCCC2)CC1

672 CNC(=O)C=COC1CCC(C=CC(=O)C2CCCCC2)CC1

673 CCN(C)CCOOC1CCC(C=CC(=O)C2CCCCC2)CC1

674 O=C(C=CC1CCC(OCCC2NNN[NH]2)CC1)C1CCCCC1

675 CN(C)C=NCCOC1CCC(C=CC(=O)C2CCCCC2)CC1

676 CN(C)SCCCC1CCC(C=CC(=O)C2CCCCC2)CC1

677 C#CN(C)CCCOOC1CCC(C=CC(=O)C2CCCCC2)CC1

678 CN(CCCOC1CCC(C=CC(=O)C2CCCCC2)CC1)C(C)(F)F

679 O=C(C=CC1CCC(OCC(O)CO)CC1)C1CCCCC1

680 CN(C)SCCCC1CCC(C=CC(=O)C2CCCCC2)CC1

681 CC[N+](C)(CC)CCCOOC1CCC(C=CC(=O)C2CCCCC2)CC1

682 C[SE]CCCOOC1CCC(C=CC(=O)C2CCCCC2)CC1

683 CN(C)CC(F)(F)COC1CCC(C=CC(=O)C2CCCCC2)CC1

684 CN1CCN=C1COC1CCC(C=CC(=O)C2CCCCC2)CC1

685 CNC1NCCN1CCCOOC1CCC(C=CC(=O)C2CCCCC2)CC1

686 CN(CCCOC1CCC(C=CC(=O)C2CCCCC2)CC1)C(C)(C)N

687 CC1ONC(CCCN(C)C)C1-C1CCC(C=CC(=O)C2CCCCC2)CC1

688 CN(C)CCCNC(=N)C1CCC(C=CC(=O)C2CCCCC2)CC1

689 CN(C)CCC=COCC1CCC(C=CC(=O)C2CCCCC2)CC1

690 CN(C)C=CCNC1CCC(C=CC(=O)C2CCCCC2)CC1

691 CC(O)CCCOC1CCC(C=CC(=O)C2CCCCC2)CC1

692 CN(C)CC=COCC1CCC(C=CC(=O)C2CCCCC2)CC1

693 CN(CCCOC1CCC(C=CC(=O)C2CCCCC2)CC1)N1CCCC1

694 CN(CCCOC1CCC(C=CC(=O)C2CCCCC2)CC1)C(BR)BR

695 CN1CC=C(OC2CCC(C=CC(=O)C3CCCCC3)CC2)CC1

696 CN(C)CCCSSC1CCC(C=CC(=O)C2CCCCC2)CC1

697 O=C(C=CC1CCC(C2CCN(CCN3CCNC3=O)CC2)CC1)C1CCCCC1

698 CN(CCCOC1CCC(C=CC(=O)C2CCCCC2)CC1)[Si](C)(C)C

699 O=C(C=CC1CCC(OCC2CCCO2)CC1)C1CCCCC1

700 CN(C)CCCSOC1CCC(C=CC(=O)C2CCCCC2)CC1

701 CSN(C)CCCOC1CCC(C=CC(=O)C2CCCCC2)CC1

702 CN(C)CCCSOC1CCC(C=CC(=O)C2CCCCC2)CC1

703 CSN(C)CCCOC1CCC(C=CC(=O)C2CCCCC2)CC1

704 CC(N)CCCOC1CCC(C=CC(=O)C2CCCCC2)CC1

705 CN(C)CCCN(C=O)C1CCC(C=CC(=O)C2CCCCC2)CC1

706 CC(=CCN(C)C)OC1CCC(C=CC(=O)C2CCCCC2)CC1

707 CCC(C)CCCOC1CCC(C=CC(=O)C2CCCCC2)CC1

708 CCC(C)CCCOC1CCC(C=CC(=O)C2CCCCC2)CC1

709 CN(CCCOC1CCC(C=CC(=O)C2CCCCC2)CC1)NC1CC1

710 CN(C)CCCC1CNCN1-C1CCC(C=CC(=O)C2CCCCC2)CC1

711 CN(C)CCCC=NC1CCC(C=CC(=O)C2CCCCC2)CC1

712 CNCCCSOC1CCC(C=CC(=O)C2CCCCC2)CC1

713 CN(CCCOC1CCC(C=CC(=O)C2CCCCC2)CC1)C1CCON1

714 CC(C)[N+](C)(C)CCCOC1CCC(C=CC(=O)C2CCCCC2)CC1

715 CN1CCC(OOC2CCC(C=CC(=O)C3CCCCC3)CC2)CC1

716 CN(CCCOC1CCC(C=CC(=O)C2CCCCC2)CC1)C(F)(F)Cl

717 NCC(C1CCCCC1)C1CCC(C=CC(=O)C2CCCCC2)CC1

718 CN(C)C(=O)C=COC1CCC(C=CC(=O)C2CCCCC2)CC1

719 COCC(O)COC1CCC(C=CC(=O)C2CCCCC2)CC1

720 CN(C)CCCC1NCN(-C2CCC(C=CC(=O)C3CCCCC3)CC2)N1

721 CC(C)CC(C)OC1CCC(C=CC(=O)C2CCCCC2)CC1

722 CN(CCCOC1CCC(C=CC(=O)C2CCCCC2)CC1)C1NNCS1

723 CN(C)CCSOC1CCC(C=CC(=O)C2CCCCC2)CC1

724 CN(C)CCSOC1CCC(C=CC(=O)C2CCCCC2)CC1

725 CN(CCCOC1CCC(C=CC(=O)C2CCCCC2)CC1)C1CCC[NH]1

726 CNCC=COC1CCC(C=CC(=O)C2CCCCC2)CC1

727 CN(CCCOC1CCC(C=CC(=O)C2CCCCC2)CC1)C1=CCCC1

728 CC1CN1CCCO1CCC(C=CC(=O)C2CCCCC2)CC1

729 CN(CCCOC1CCC(C=CC(=O)C2CCCCC2)CC1)C1CSCN1

730 NCC(O)COC1CCC(C=CC(=O)C2CCCCC2)CC1

731 CN(CCCOC1CCC(C=CC(=O)C2CCCCC2)CC1)C1CN[NH]C1

732 CN(CCCOC1CCC(C=CC(=O)C2CCCCC2)CC1)C1CC[NH]C1

733 CC1CCSC1N(C)CCCO1CCC(C=CC(=O)C2CCCCC2)CC1

734 CN1CCC=C(OC2CCC(C=CC(=O)C3CCCCC3)CC2)C1

735 NCC(CC1CCCCC1)C1CCC(C=CC(=O)C2CCCCC2)CC1

736 CN(C)CCC[Si](C)(C)C1CCC(C=CC(=O)C2CCCCC2)CC1

737 CN(CCCOC1CCC(C=CC(=O)C2CCCCC2)CC1)C1CCCN1C

738 CNC(C)CCOC1CCC(C=CC(=O)C2CCCCC2)CC1

739 C[N+](C)(C)C1(CCCOC2CCC(C=CC(=O)C3CCCCC3)CC2)CCCCC1

740 CN(C)CCCC1NNN(-C2CCC(C=CC(=O)C3CCCCC3)CC2)N1

741 CN1CCNC1C(C)(C)CCOC1CCC(C=CC(=O)C2CCCCC2)CC1

742 C[N+](C)(C)C1(CCCOC2CCC(C=CC(=O)C3CCCCC3)CC2)CCCCC1

743 CC1CCN(CCCOC2CCC(C=CC(=O)C3CCCCC3)CC2)C1

744 CN(CCCOC1CCC(C=CC(=O)C2CCCCC2)CC1)C1CCNN1C

745 CN(C)CC1(OC2CCC(C=CC(=O)C3CCCCC3)CC2)CC1

746 CC(CCCOC1CCC(C=CC(=O)C2CCCCC2)CC1)C(=O)O

747 CN(C)CNO1CCC(C=CC(=O)C2CCCCC2)CC1

748 CN(CCCOC1CCC(C=CC(=O)C2CCCCC2)CC1)OC1CC1

749 CN(C)C#CCOC1CCC(C=CC(=O)C2CCCCC2)CC1

750 C[P+](C)(C)CCOC1CCC(C=CC(=O)C2CCCCC2)CC1

751 CC1(C)CC(OC2CCC(C=CC(=O)C3CCCCC3)CC2)CC(C)(C)N1

752 CN(C)CCN(C)OC1CCC(C=CC(=O)C2CCCCC2)CC1

753 C[N+](C)(CCCOC2CCC(C=CC(=O)C3CCCCC3)CC2)CCCCC1

754 CN(C)CCN(C)OC1CCC(C=CC(=O)C2CCCCC2)CC1

755 CN(C)CC(=O)N(C)OC1CCC(C=CC(=O)C2CCCCC2)CC1

756 CNC(C)CCCOC1CCC(C=CC(=O)C2CCCCC2)CC1

757 CN(C)C#CCCOC1CCC(C=CC(=O)C2CCCCC2)CC1

758 CN(C)CCCN(C)OC1CCC(C=CC(=O)C2CCCCC2)CC1

759 COC(C)CCOC1CCC(C=CC(=O)C2CCCCC2)CC1

760 CC(O)CNCCOC1CCC(C=CC(=O)C2CCCCC2)CC1

761 CCN(C)CC=COC1CCC(C=CC(=O)C2CCCCC2)CC1

762 O=C(C=CC1CCC(OCC(O)CN2CCCC2)CC1)C1CCCCC1

763 CN(C)CCCN=NC1CCC(C=CC(=O)C2CCCCC2)CC1

764 CNCC(O)COC1CCC(C=CC(=O)C2CCCCC2)CC1

765 CN(CCCOC1CCC(C=CC(=O)C2CCCCC2)CC1)C(Cl)(Cl)Cl

766 CN(C)CSCOC1CCC(C=CC(=O)C2CCCCC2)CC1

767 CN1CCC(COC2CCC(C=CC(=O)C3CCCCC3)CC2)C1



768 CNC1=NCCN1CCCOC1CCC(C=CC(=O)C2CCCCC2)CC1

769 CC(CCC1CCC(C=CC(=O)C2CCCCC2)CC1)N(C)C

770 CC(COC1CCC(C=CC(=O)C2CCCCC2)CC1)N(C)C

771 CC(C)C(C)CCCOC1CCC(C=CC(=O)C2CCCCC2)CC1

772 CC1CCCN(CCCOC2CCC(C=CC(=O)C3CCCCC3)CC2)C1

773 CN(C)CCCSC(C)(C)C1CCC(C=CC(=O)C2CCCCC2)CC1

774 CN(CCCOC1CCC(C=CC(=O)C2CCCCC2)CC1)C1NCCO1

775 CN(CCCOC1CCC(C=CC(=O)C2CCCCC2)CC1)C1NN[NH]N1

776 CN=C(S)CCCOC1CCC(C=CC(=O)C2CCCCC2)CC1

777 COC(C)CCCOC1CCC(C=CC(=O)C2CCCCC2)CC1

778 CN1CCCC(OC2CCC(C=CC(=O)C3CCCCC3)CC2)CC1

779 CC1CCCN1CCCOC1CCC(C=CC(=O)C2CCCCC2)CC1

780 O=C(C=CC1CCC(OCC2CCOC2)CC1)C1CCCCC1

781 CN(C)CCC(O)C1CCC(C=CC(=O)C2CCCCC2)CC1

782 CC(=COC1CCC(C=CC(=O)C2CCCCC2)CC1)CN(C)C

783 CN(C)CC#COC1CCC(C=CC(=O)C2CCCCC2)CC1

784 CN(C)CCC(C1CCCCC1)C1CCC(C=CC(=O)C2CCCCC2)CC1

785 CCC(N)CCCOC1CCC(C=CC(=O)C2CCCCC2)CC1

786 CN1CCCC1COC1CCC(C=CC(=O)C2CCCCC2)CC1

787 CC(NCCCN(C)C)C1CCC(C=CC(=O)C2CCCCC2)CC1

788 CC(CN(C)C)OC1CCC(C=CC(=O)C2CCCCC2)CC1

789 CN1CCCC(COC2CCC(C=CC(=O)C3CCCCC3)CC2)C1

790 CC(CN(C)C)OC1CCC(C=CC(=O)C2CCCCC2)CC1

791 C[N+](C)CCC(OC2CCC(C=CC(=O)C3CCCCC3)CC2)CC1

792 CN1CCC(OC2CCC(C=CC(=O)C3CCCCC3)CC2)C1

793 CC(C)NCC(O)COC1CCC(C=CC(=O)C2CCCCC2)CC1

794 CC1CC(=O)N(C)N1CCCOC1CCC(C=CC(=O)C2CCCCC2)CC1

795 C[N+](C)(C)CCOOC1CCC(C=CC(=O)C2CCCCC2)CC1

796 O=C(C=CC1CCC(OCCCN2CCC(O)C2)CC1)C1CCCCC1

797 CN(CCCOC1CCC(C=CC(=O)C2CCCCC2)CC1)C1CCN[NH]1

798 CN(C)C=CCN(C)C1CCC(C=CC(=O)C2CCCCC2)CC1

799 CC1CCCCN1CCCOC1CCC(C=CC(=O)C2CCCCC2)CC1

800 CC(C)N(C)CC=COC1CCC(C=CC(=O)C2CCCCC2)CC1

801 CC(C)N(C)CC=COC1CCC(C=CC(=O)C2CCCCC2)CC1

802 CN(C)CC=NOC1CCC(C=CC(=O)C2CCCCC2)CC1

803 CN1CCCCC1COC1CCC(C=CC(=O)C2CCCCC2)CC1

804 CN(CCCOC1CCC(C=CC(=O)C2CCCCC2)CC1)C1CCNO1

805 O=C(C=CC1CCC(OCC2CCNC2)CC1)C1CCCCC1

806 CCN1CCCC(OC2CCC(C=CC(=O)C3CCCCC3)CC2)C1

807 CN1CCCC1CCOC1CCC(C=CC(=O)C2CCCCC2)CC1

808 CC(CCCN(C)C)OC1CCC(C=CC(=O)C2CCCCC2)CC1

809 CN1CCCCC1CCOC1CCC(C=CC(=O)C2CCCCC2)CC1

810 CCN(CC)CC(O)COC1CCC(C=CC(=O)C2CCCCC2)CC1

811 CN(C)CCC(O)COC1CCC(C=CC(=O)C2CCCCC2)CC1

812 CN1CC[N+](CCCOC2CCC(C=CC(=O)C3CCCCC3)CC2)C1

813 CC1CN(CCCOC2CCC(C=CC(=O)C3CCCCC3)CC2)CCO1

814 CC(OCCN(C)C)C1CCC(C=CC(=O)C2CCCCC2)CC1

815 CN(CCCOC1CCC(C=CC(=O)C2CCCCC2)CC1)C1CC[NH]N1

816 CC(OCCCN(C)C)C1CCC(C=CC(=O)C2CCCCC2)CC1

817 CC1C[N+](C)CN1CCCOC1CCC(C=CC(=O)C2CCCCC2)CC1

818 O=C(C=CC1CCC(OCCC2CCCCN2)CC1)C1CCCCC1

819 CN(C)CC(OC1CCC(C=CC(=O)C2CCCCC2)CC1)C1CCCCC1

820 O=C(C=CC1CCC(OCCCN2CCC(F)C2)CC1)C1CCCCC1

821 CCC(CN(C)C)OC1CCC(C=CC(=O)C2CCCCC2)CC1

822 CN(C)C=CC=COC1CCC(C=CC(=O)C2CCCCC2)CC1

823 CC1COCCN1CCCOC1CCC(C=CC(=O)C2CCCCC2)CC1

824 CN(CCCOC1CCC(C=CC(=O)C2CCCCC2)CC1)C1CC2CCC1C2

825 O=C(C=CC1CCC(OC2CC3CCC(C2)N3)CC1)C1CCCCC1

826 CCN(CCCOC1CCC(C=CC(C2CCCCC2)=O)CC1)C

### ***In vitro* inhibition of AChE**

The inhibitory potency of target compounds on AChE was determined using spectroscopic method of Ellman *et al.*, (1961) [43] with slight modification and was expressed as IC<sub>50</sub>, rat cortex homogenate was used as the resource of AChE. For assay of AChE activity, a reaction mixture containing 100µl acetylthiocholine iodide 0.075M/L, 100µl sodium phosphate buffer (0.1M/L, pH 7.4), 20µl homogenate or serum and different concentrations of test compounds 20µl was incubated at 37° C for 15 min. The reaction was terminated by adding 50µl 3% sodium lauryl sulfate, then, 50µl, 0.2% of 5,5'-dithio-bis-(2-nitrobenzoic acid) (DTNB, 10 mg DTNB in 100 mL of Sorenson phosphate buffer, pH 8.0) was added to produce the yellow anion of 5-thio-2-nitro-benzoic acid. Assays were carried out with a blank containing all components except AChE in order to account for non-enzymatic reaction. The values of IC<sub>50</sub> were calculated by UV spectroscopy from the absorbance changes at 450 nm. A positive control of donepezil was used in the same range of concentrations. Each concentration was analyzed in triplicate. Data from concentration-inhibition experiments of the inhibitors were calculated by nonlinear regression analysis, using the GraphPad Prism 5 program.

### ***In vitro* advanced glycation end-product (AGEs) formation inhibitory activity**

The assay for the ability of the synthesized compounds to inhibit the glucose-mediated protein glycation and the development of fluorescent AGEs was performed. Different concentrations of various compounds were prepared by dissolving in DMSO. Anti-glycation assay was performed according to the methods reported by Matsuura and colleagues with slight modification. In all experiments, about 500 µl of Bovine serum albumin (1mg/ml final concentration) was incubated with 400 µl of glucose (500 mM) in the presence of 100 µl of test compounds, aminoguanidine or PBS as control buffer at different concentrations, The reaction was allowed to proceed at 60°C for 24hrs and thereafter reaction was stopped by adding 10 µl of 100% (w/v) trichloroacetic acid (TCA). Then the mixture was kept at 4°C for 10 min before subjected to centrifugation at 15,000 rpm. The precipitate was redissolved in 1ml alkaline PBS (pH10) and immediately quantified for relative amount of glycated BSA based on fluorescence intensity by spectrofluorometer LS-55 (Perkin Elmer) at 370 nm (excitation) and 440 nm (emission). Aminoguanidine was used as a positive control. Percentage inhibition was calculated. All experiments were performed in triplicate.

### **Radical scavenging activity (DPPH Method)**

The stable 1, 1-diphenyl-2-picryl hydrazyl radical (DPPH) was used for determination of free radical-scavenging activity of the test compounds. The 0.1 mM solution of DPPH in methanol (39.4 mg in 1000 ml) was freshly prepared. Different concentrations of test compounds were added with an equal volume to methanol solution of DPPH. After 30 min at room temperature, the absorbance was recorded at 517 nm. Ascorbic acid was used as standard.  $IC_{50}$  values denote the concentration of sample, which is required to scavenge 50% of DPPH free radicals.  $IC_{50}$  value was determined from the plotted graph of scavenging activity against the different concentrations of test compounds. Ascorbic acid was applied as positive drug (Blois, 1958) [75].
